# Supplementary material
Source: MDPI journal article supplement (https://www.mdpi.com/2073-4352/13/8/1208)
Supplement: s1 [file s1]

# *Electronic Supporting Information*

## *Effects of Tetrafluorocyclohexa-1,3-diene Ring Position on Photoluminescence and Liquid-Crystalline Properties of Tricyclic $\pi$ -Conjugated Molecules*

Haruka Ohsato, Shigeyuki Yamada,\*  
Motohiro Yasui, and Tsutomu Konno\*

Faculty of Molecular Chemistry and Engineering, Kyoto Institute of Technology,  
Matsugasaki, Sakyo-ku, Kyoto 606-8585, Japan

\*Correspondence: [syamada@kit.ac.jp](mailto:syamada@kit.ac.jp) (S.Y.) and [konno@kit.ac.jp](mailto:konno@kit.ac.jp) (T.K.)

### Table of Contents:

|                                    |           |      |
|------------------------------------|-----------|------|
| 1. Experimental                    | • • • • • | S-2  |
| 2. NMR Spectra                     | • • • • • | S-12 |
| 3. X-ray crystallographic analysis | • • • • • | S-33 |
| 4. DFT Calculation                 | • • • • • | S-34 |
| Cartesian coordinate               | • • • • • | S-38 |
| 5. Photophysical properties        | • • • • • | S-42 |
| 6. Phase transition properties     | • • • • • | S-47 |

## 1. Synthesis of 2a and 2d

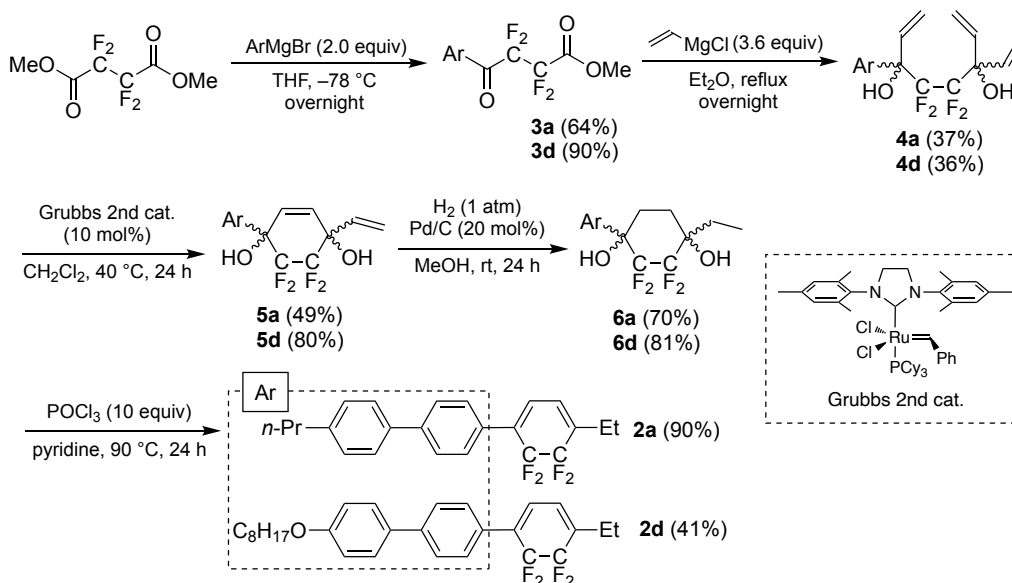

**Scheme S1.** Synthetic procedure of **2a** and **2d** starting from commercially available dimethyl 2,2,3,3-tetrafluorosuccinate.

### 1-1. Typical procedure for the preparation of methyl 2,2,3,3-tetrafluoro-4-oxo-4-[4-(4-n-propylphenyl)phenyl]butanoate (**3a**)

To a solution of dimethyl 2,2,3,3-tetrafluorosuccinate (3.27 g, 15 mmol) in THF (30 mL) was added a THF solution of 4-(4-propylphenyl)phenylmagnesium bromide, prepared from 4-(4-propylphenyl)phenyl bromide (30 mmol) and magnesium turnings (33 mmol) at  $-78\text{ }^{\circ}\text{C}$ . Then, the mixture was stirred at that temperature overnight. The reaction mixture was poured into aqueous  $\text{NH}_4\text{Cl}$  solution, then the whole was extracted with EtOAc three times. The combined organic layers were dried over anhydrous  $\text{Na}_2\text{SO}_4$ , filtered, and concentrated in vacuo. The residue was purified by silica gel column chromatography to afford the  $\beta$ -keto ester **3a** in 64% yield (3.55 g, 9.60 mmol).

#### Methyl 2,2,3,3-tetrafluoro-4-oxo-4-[4-(4-n-propylphenyl)phenyl]butanoate (**3a**)

Yield: 64% (3.55 g, 9.60 mmol);  $^1\text{H}$  NMR ( $\text{CDCl}_3$ ):  $\delta$  1.96 (t,  $J = 7.4$  Hz, 3H), 1.69 (sext.,  $J = 7.4$  Hz, 2H), 2.65 (t,  $J = 7.4$  Hz, 2H), 3.97 (s, 3H), 7.31 (d,  $J = 8.4$  Hz, 2H), 7.57 (d,  $J = 8.0$  Hz, 2H), 7.75 (d,  $J = 8.0$  Hz, 2H), 7.66 (d,  $J = 8.4$  Hz, 2H);  $^{13}\text{C}$  NMR ( $\text{CDCl}_3$ ):  $\delta$  13.8, 24.4, 37.7, 54.0, 108.2 (tt,  $J = 262.7, 27.8$  Hz), 111.2 (tt,  $J = 270.1, 28.5$  Hz), 127.2, 127.3, 129.2, 130.8 (two carbons were overlapped), 136.4, 143.8, 148.2, 160.4 (t,  $J = 30.0$  Hz), 184.9 (t,  $J = 27.1$  Hz);  $^{19}\text{F}$  NMR ( $\text{CDCl}_3, \text{CFCl}_3$ ):  $\delta$  -120.97 (t,  $J = 4.9$  Hz, 2F), -113.46 (t,  $J = 4.9$  Hz, 2F). The compound characterization data were consistent with those described in previously published reports.<sup>1</sup>

#### Methyl 2,2,3,3-tetrafluoro-4-oxo-4-[4-(4-octyloxyphenyl)phenyl]butanoate (**3d**)

Yield: 90% (5.06 g, 10.8 mmol); White solid; M.p.:  $42.3\text{--}43.8\text{ }^{\circ}\text{C}$ ;  $^1\text{H}$  NMR ( $\text{CDCl}_3$ ):  $\delta$  0.90 (t,  $J = 7.2$  Hz, 3H), 1.25–1.43 (m, 8H), 1.49 (quin,  $J = 6.8$  Hz, 2H), 1.82 (quin,  $J = 6.4$  Hz, 2H), 3.97 (s, 3H), 4.02 (t,  $J = 6.4$  Hz, 2H), 7.01 (d,  $J = 8.8$  Hz, 2H), 7.60 (d,  $J = 8.8$  Hz, 2H), 7.72 (d,  $J = 8.8$  Hz, 2H), 8.15 (d,  $J = 8.8$



Hz, 2H);  $^{13}\text{C}$  NMR ( $\text{CDCl}_3$ ):  $\delta$  14.1, 22.6, 26.0, 29.20, 29.22, 29.3, 31.8, 54.0, 68.2, 108.2 (tt,  $J = 302.3$ , 27.9 Hz), 110.8 (tt,  $J = 231.9$ , 27.9 Hz), 115.1, 126.7, 128.5, 128.8, 130.9, 131.1, 147.8, 160.1, 160.3 (t,  $J = 30.0$  Hz), 184.8 (t,  $J = 27.2$  Hz);  $^{19}\text{F}$  NMR ( $\text{CDCl}_3$ ):  $\delta$  -112.99 (s, 2F), -120.67 (s, 2F); IR (KBr):  $\nu$  2926, 2855, 2532, 2362, 1789, 1685, 1593, 1428, 1408, 1391, 1200, 1175, 1012, 832, 752, 731  $\text{cm}^{-1}$ ; HRMS (FAB) Calcd for  $\text{C}_{25}\text{H}_{28}\text{F}_4\text{O}_4$   $[\text{M}]^+$ : 468.1924, Found: 468.1932.

### 1-2. Typical procedure for the synthesis of 3-ethenyl-4,4,5,5-tetrafluoro-6-[4-(4-propylphenyl)phenyl]-1,7-octadien-3,6-diol (4a)

To a solution of  $\beta$ -keto ester (**3a**, 3.55 g, 9.3 mmol) in  $\text{Et}_2\text{O}$  (90 mL) was added a THF solution of vinylmagnesium chloride (2.1 M, 16 mL, 33.5 mmol) at room temperature and continuously stirred at reflux temperature overnight. The reaction mixture was poured into aqueous  $\text{NH}_4\text{Cl}$  solution and the whole was extracted with  $\text{Et}_2\text{O}$  three times. The combined organic layer was dried over anhydrous  $\text{Na}_2\text{SO}_4$ , filtered, and concentrated in vacuo. The residue was purified by silica gel column chromatography to afford the desired diol **4a** in 37% yield (1.48 g, 3.44 mmol).

### 3-Ethenyl-4,4,5,5-tetrafluoro-6-[4-(4-*n*-propylphenyl)phenyl]-1,7-octadien-3,6-diol (4a)

Yield: 37% (1.48 g, 3.44 mmol);  $^1\text{H}$  NMR ( $\text{CDCl}_3$ ):  $\delta$  1.03 (t,  $J = 7.4$  Hz, 3H), 1.73 (sext.,  $J = 7.4$  Hz, 2H), 2.68 (t,  $J = 7.4$  Hz, 2H), 3.75 (s, 1H), 4.75 (s, 1H), 5.42 (d,  $J = 10.8$  Hz, 1H), 5.43 (d,  $J = 10.8$  Hz, 1H), 5.45 (d,  $J = 10.8$  Hz, 1H), 5.57 (d,  $J = 17.2$  Hz, 2H), 5.58 (d,  $J = 17.2$  Hz, 1H), 6.15 (dd,  $J = 17.2$ , 10.8 Hz, 1H), 6.23 (dd,  $J = 17.2$ , 10.8 Hz, 1H), 6.69 (dd,  $J = 17.2$ , 10.8 Hz, 1H), 7.30 (d,  $J = 8.4$  Hz, 2H), 7.56 (d,  $J = 8.4$  Hz, 2H), 7.62 (d,  $J = 8.4$  Hz, 2H), 7.68 (d,  $J = 8.4$  Hz, 2H);  $^{13}\text{C}$  NMR ( $\text{CDCl}_3$ ):  $\delta$  13.8, 24.5, 37.6, 77.27 (t,  $J = 24.9$  Hz), 77.33 (t,  $J = 24.9$  Hz), 116.0, 117.1, 117.4, 117.6 (tt,  $J = 265.0$ , 28.5 Hz), 117.8 (tt,  $J = 264.3$ , 29.2 Hz), 126.3, 126.9, 127.4, 128.8, 133.7, 134.5, 137.1, 137.3, 137.8, 140.8, 142.0;  $^{19}\text{F}$  NMR ( $\text{CDCl}_3$ ,  $\text{CFCl}_3$ ):  $\delta$  -116.23 to -116.19 (m, 2F), -114.45 (d,  $J = 278.3$  Hz, 1F), -113.36 (d,  $J = 278.3$  Hz, 1F). The compound characterization data were consistent with those described in previously published reports.<sup>1</sup>

### 3-Ethenyl-4,4,5,5-tetrafluoro-6-[4-(4-octyloxyphenyl)phenyl]-1,7-octadien-3,6-diol (4d)

Yield: 36% (2.25 g, 4.32 mmol); Yellow liquid;  $^1\text{H}$  NMR ( $\text{CDCl}_3$ ):  $\delta$  0.91 (t,  $J = 7.6$  Hz, 3H), 1.28–1.43 (m, 8H), 1.49 (quin,  $J = 7.6$  Hz, 2H), 1.82 (quin,  $J = 7.6$  Hz, 2H), 3.48 (s, 1H), 3.96–4.08 (m, 2H), 4.53 (s, 1H), 5.36–5.48 (m, 3H), 5.50–5.60 (m, 3H), 6.06–6.24 (m, 2H), 6.60–6.73 (m, 1H), 6.92–7.03 (m, 3H), 7.49–7.68 (m, 10H);  $^{13}\text{C}$  NMR ( $\text{CDCl}_3$ ):  $\delta$  14.1, 22.6, 26.0, 29.2, 29.3, 29.4, 31.8, 68.1, 114.8, 115.9, 116.2, 117.1, 117.4, 126.1, 127.1, 127.4, 128.1, 132.7, 133.7, 134.5, 136.3, 136.9, 137.1, 140.6, 158.8, several carbons coupled with F atoms were not detected due to the presence of diastereomer mixture;  $^{19}\text{F}$  NMR ( $\text{CDCl}_3$ ):  $\delta$  -111.28 (d,  $J = 279.3$  Hz, 0.5F), -112.58 (d,  $J = 279.3$  Hz, 0.5F), -112.39 (d,  $J = 278.9$  Hz, 1F), -113.66 (d,  $J = 278.9$  Hz, 1F), -115.33 (m, 2F); IR (neat):  $\nu$  3362, 3036, 2927, 2856, 1709, 1608, 1581, 1525, 1401, 1376, 1177, 1119, 859, 836  $\text{cm}^{-1}$ ; HRMS (FAB) Calcd for  $\text{C}_{30}\text{H}_{36}\text{F}_4\text{O}_3$   $[\text{M}]^+$ : 520.2601, Found: 520.2603.

### 1-3. Typical procedure for the preparation of *cis*-1-ethenyl-5,5,6,6-tetrafluoro-4-[4-(4-*n*-propylphenyl)phenyl]-2-cyclohexen-1,4-diol (5a)

To a solution of 10 mol% of Grubbs 2nd generation catalyst (0.28 g, 0.34 mmol) in  $\text{CH}_2\text{Cl}_2$  (17 mL) was

added 1,7-octadiene-3,6-diol **4a** (1.48 g, 3.4 mmol) at room temperature and stirred at that temperature for 40 h. The reaction mixture was passed through a short plug of silica gel using EtOAc as an eluent and concentrated in vacuo to give the crude mixture. Purification by silica gel column chromatography using a mixed solvent system (hexane/EtOAc = 3/1) afforded the desired product **5a** in 49% yield (0.68 g, 1.39 mmol).

***cis*-1-Ethenyl-5,5,6,6-tetrafluoro-4-[4-(4-*n*-propylphenyl)phenyl]-2-cyclohexen-1,4-diol (**5a**)**

Yield: 49% (0.68 g, 1.39 mmol); <sup>1</sup>H NMR (CDCl<sub>3</sub>): δ 0.98 (t, *J* = 7.2 Hz, 3H), 1.68 (sext., *J* = 7.2 Hz, 2H), 2.59 (d, *J* = 5.2 Hz, 1H), 2.63 (t, *J* = 7.2 Hz, 2H), 2.74 (d, *J* = 4.0 Hz, 1H), 5.49 (d, *J* = 10.7 Hz, 1H), 5.67 (d, *J* = 16.8 Hz, 1H), 5.92–6.09 (m, 3H), 7.26 (d, *J* = 8.0 Hz, 2H), 7.50–7.53 (m, 4H), 7.61 (d, *J* = 8.8 Hz, 2H); <sup>13</sup>C NMR (CDCl<sub>3</sub>): δ 13.8, 24.5, 37.7, 74.4–75.0 (m, 2C), 111.0–119.1 (m, 2C), 126.6, 127.0, 127.8, 128.9, 130.7, 131.65, 131.69, 133.4 (t, *J* = 5.0 Hz), 134.6, 137.6, 141.9, 142.3; <sup>19</sup>F NMR (CDCl<sub>3</sub>, CFCl<sub>3</sub>): δ –132.24 to –131.45 (m, 1F), –130.93 to –130.17 (m, 1F), –122.33 (ddd, *J* = 263.6, 19.6, 4.9 Hz, 1F), –116.18 (ddd, *J* = 268.5, 17.3, 6.1 Hz, 1F). The compound characterization data were consistent with those described in previously published reports.<sup>1</sup>

***cis*-1-Ethenyl-5,5,6,6-tetrafluoro-4-[4-(4-octyloxyphenyl)phenyl]-2-cyclohexen-1,4-diol (**5d**)**

Yield: 80% (0.79 g, 1.6 mmol); dark liquid; <sup>1</sup>H NMR (CDCl<sub>3</sub>): δ 0.91 (t, *J* = 7.2 Hz, 3H), 1.22–1.41 (m, 8H), 1.48 (quin, *J* = 7.2 Hz, 2H), 1.82 (quin, *J* = 6.8 Hz, 2H), 2.99 (brs, 1H), 3.04 (brs, 1H), 4.00 (t, *J* = 6.4 Hz, 2H), 5.47 (d, *J* = 10.8 Hz, 1H), 5.66 (d, *J* = 17.2 Hz, 1H), 5.90–5.95 (m, 1H), 6.00–6.12 (m, 1H), 6.98 (d, *J* = 8.8 Hz, 2H), 7.44–7.68 (m, 6H); <sup>13</sup>C NMR (CDCl<sub>3</sub>): δ 14.1, 22.6, 26.0, 29.22, 29.25, 29.3, 31.8, 68.1, 74.7 (td, *J* = 20.5, 9.4 Hz), 114.8, 119.0, 126.3, 127.8, 128.1, 132.1 (dt, *J* = 278.0, 4.3 Hz), 132.6, 133.0 (dt, *J* = 262.6, 4.63 Hz), 141.5, 158.9; <sup>19</sup>F NMR (CDCl<sub>3</sub>): δ –115.52 (dd, *J* = 262.8, 13.6 Hz, 1F), –121.40 (dd, *J* = 264.3, 13.6 Hz, 1F), –132.14 (dd, *J* = 262.8, 17.6 Hz, 1F), –131.19 (dd, *J* = 268.4, 17.6 Hz, 1F); IR (neat): ν 3417, 3035, 2927, 2855, 1888, 1708, 1607, 1497, 1470, 1402, 1293, 1140, 879, 783 cm<sup>–1</sup>; HRMS (FAB) Calcd for C<sub>28</sub>H<sub>32</sub>F<sub>4</sub>O<sub>3</sub> [M]<sup>+</sup>: 492.2288, Found: 492.2282.

**1-4. Typical procedure for the synthesis of 1-ethyl-2,2,3,3-tetrafluoro-4-[4-(4-*n*-propylphenyl)phenyl]cyclohexan-1,4-diol (**6a**)**

In a two-necked round-bottomed flask, equipped with a teflon®-coated magnetic stirring bar and three-way stopcock attached to a balloon filled with hydrogen gas, were added 10% Pd/C (0.16 g, 0.15 mmol), tetrafluorinated cyclohexen-1,4- diol **5a** (0.65 g, 1.5 mmol) and MeOH (15 mL). To the suspension was bubbled hydrogen gas (1 atm) using a vacuum aspirator three times, then the whole solution was vigorously stirred at room temperature for 24 h. The crude product was passed through silica gel to remove palladium ash, after which the crude product was purified by column chromatography using hexane/EtOAc = 3/1 as an eluent to obtain the corresponding tetrafluorinated cyclohexan-1,4-diol **6a** in 70% yield (0.43 g, 1.05 mmol).

**1-Ethyl-2,2,3,3-tetrafluoro-4-[4-(4-*n*-propylphenyl)phenyl]cyclohexan-1,4-diol (6a)**

Yield: 70% (0.43 g, 1.05 mmol); White solid; m.p.: 139–140 °C; <sup>1</sup>H NMR (CDCl<sub>3</sub>): δ 0.98 (t, *J* = 7.2 Hz, 3H), 1.06 (t, *J* = 7.6 Hz, 3H), 1.68 (sext, *J* = 7.61 Hz, 2H), 1.74–2.00 (m, 5H), 2.11 (t, *J* = 13.2 Hz), 2.54 (d, *J* = 2.0 Hz, 1H), 2.63 (t, *J* = 7.6 Hz, 2H), 2.78 (t, *J* = 13.2 Hz, 1H), 7.26 (d, *J* = 8.1 Hz, 2H), 7.52 (d, *J* = 8.1 Hz, 2H), 7.61–7.66 (m, 4H); <sup>13</sup>C NMR (CDCl<sub>3</sub>): δ 13.9, 24.5, 26.7 (d, *J* = 4.1 Hz), 27.1, 29.5 (d, *J* = 3.3 Hz), 37.7, 74.4 (ddd, *J* = 24.8, 22.2, 1.7 Hz), 75.4 (ddd, *J* = 24.8, 20.7, 1.7 Hz), 113.6–119.1 (m, 2C), 126.7, 126.9, 127.1 (d, *J* = 2.5 Hz), 128.9, 137.2 (d, *J* = 1.6 Hz), 137.7, 141.4, 142.2; <sup>19</sup>F NMR (CDCl<sub>3</sub>, CFCl<sub>3</sub>): δ –135.63 (ddd, *J* = 268.3, 14.7, 8.6 Hz, 1F), –134.65 (ddd, *J* = 268.3, 12.0, 6.1 Hz, 1F), –116.1 (dt, *J* = 268.5, 9.8 Hz, 1F), –112.33 (ddd, *J* = 268.3, 14.3, 9.8 Hz, 1F); The compound characterization data were consistent with those described in previously published reports.<sup>1</sup>

**1-Ethyl-2,2,3,3-tetrafluoro-4-[4-(4-octyloxyphenyl)phenyl]cyclohexan-1,4-diol (6d)**

Yield: 77% (0.38 g, 0.77 mmol); M.p.: 73.5–74.5 °C; <sup>1</sup>H NMR (CDCl<sub>3</sub>): δ 0.91 (t, *J* = 6.8 Hz, 3H), 1.06 (t, *J* = 7.2 Hz, 3H), 1.22–1.41 (m, 11H), 1.41–1.52 (m, 3H), 1.73–1.92 (m, 5H), 2.86 (brs, 1H), 4.00 (t, *J* = 6.4 Hz, 2H), 6.98 (d, *J* = 8.8 Hz, 2H), 7.53 (d, *J* = 8.8 Hz, 2H), 7.59 (s, 4H); <sup>13</sup>C NMR (CDCl<sub>3</sub>): δ 14.1, 22.6, 26.0, 29.2, 29.3, 29.4, 31.8, 68.1, 74.8 (t, *J* = 20.5 Hz), 75.2 (dd, *J* = 26.4, 21.2 Hz), 114.8, 126.4, 127.1, 128.1, 128.3, 132.4, 136.3, 141.2, 158.9, The two carbons assigned as CF<sub>2</sub>CF<sub>2</sub> unit were not found in the spectrum due to low intensities caused by spin-spin coupling with fluorine atom; <sup>19</sup>F NMR (CDCl<sub>3</sub>): δ –113.09 (d, *J* = 276.3 Hz, 1F), –116.96 (dd, *J* = 274.1 Hz, 1F), –131.82 (d, *J* = 252.2 Hz, 1F), –134.35 (d, *J* = 258.6 Hz, 2F); IR (KBr): ν 3457, 3037, 2934, 2853, 1890, 1711, 1607, 1581, 1560, 1527, 1392, 1255, 1203, 1158, 997, 897, 760 cm<sup>–1</sup>; HRMS (FAB) Calcd for C<sub>28</sub>H<sub>36</sub>F<sub>4</sub>O<sub>3</sub> [M]<sup>+</sup>: 496.2601, Found: 496.2601.

**1-5. Typical procedure for the synthesis of 4-ethyl-5,5,6,6-tetrafluoro-1-[4-(4-*n*-propylphenyl)phenyl]cyclohexa-1,3-diene (2a)**

In a two-necked round-bottomed flask containing a teflon<sup>®</sup>-coated magnetic stirring bar, tetrafluorinated cyclohexan-1,4-diol **6a** (0.30 g, 0.74 mmol) and pyridine (7.4 mL) were placed. To the solution was added freshly distilled POCl<sub>3</sub> (0.70 mL, 7.4 mmol) at room temperature, and the whole solution was heated at 90 °C (bath temp.) for 24 h. After cooling the reaction mixture to room temperature, the resultant solution was poured into saturated aqueous NH<sub>4</sub>Cl solution and acidified by adding 3N HCl solution. The whole solution was extracted with EtOAc three times, and the combined organic layer was dried over anhydrous Na<sub>2</sub>SO<sub>4</sub>, filtered, and concentrated in vacuo. The residue was purified by silica gel column chromatography (eluent: hexane/EtOAc = 10/1) to afford the corresponding tetrafluorinated cyclohexa-1,3-diene **2a** in 90% yield (0.25 g, 0.67 mmol).

**4-Ethyl-5,5,6,6-tetrafluoro-1-[4-(4-*n*-propylphenyl)phenyl]cyclohexa-1,3-diene (2a)**

Yield 90% (0.25 g, 0.67 mmol); M.p.: 92 °C determined by DSC; <sup>1</sup>H NMR (CDCl<sub>3</sub>): δ 0.98 (t, *J* = 7.2 Hz, 3H), 1.20 (t, *J* = 7.6 Hz, 3H), 1.69 (sext, *J* = 7.6 Hz, 2H), 2.40 (q, *J* = 7.2 Hz, 2H), 2.64 (t, *J* = 7.2 Hz, 2H), 6.09 (d, *J* = 6.0 Hz, 1H), 6.39 (d, *J* = 6.0 Hz, 1H), 7.27 (d, *J* = 7.8 Hz, 2H), 7.53 (d, *J* = 8.4 Hz, 4H), 7.62 (d, *J* = 7.6 Hz, 2H); <sup>13</sup>C NMR (CDCl<sub>3</sub>): δ 11.4, 13.8, 21.6, 24.5, 37.7, 114.0 (tt, *J* = 251.87, 26.82 Hz), 114.1 (tt, *J* = 251.9, 26.8 Hz), 123.1 (t, *J* = 9.2 Hz), 125.8 (t, *J* = 8.79 Hz), 126.8, 126.9, 127.4, 129.0, 131.7, 133.6 (t, *J* = 22.0 Hz), 137.6, 137.8 (t, *J* = 21.9 Hz), 141.5, 142.3; <sup>19</sup>F NMR (CDCl<sub>3</sub>, CFCl<sub>3</sub>): δ –126.57 (d,

$J = 4.76$  Hz, 2F),  $-122.23$  (d,  $J = 4.86$  Hz, 2F); The compound characterization data were consistent with those described in previously published reports.<sup>1</sup>

**4-Ethyl-5,5,6,6-tetrafluoro-1-[4-(4-octyloxyphenyl)phenyl]cyclohexa-1,3-diene (2d)**

Yield: 83% (0.32 g, 0.69 mmol); Pale yellow solid; M.p.:  $71^{\circ}\text{C}$  determined by DSC;  $^1\text{H}$  NMR ( $\text{CDCl}_3$ ):  $\delta$  0.90 (t,  $J = 6.8$  Hz, 3H), 1.19 (t,  $J = 7.2$  Hz, 3H), 1.26–1.42 (m, 8H), 1.48 (quin,  $J = 8.0$  Hz, 2H), 1.81 (quin,  $J = 7.2$  Hz, 2H), 2.40 (q,  $J = 7.2$  Hz, 2H), 4.00 (t,  $J = 6.8$  Hz, 2H), 6.09 (d,  $J = 6.0$  Hz, 1H), 6.38 (d,  $J = 6.0$  Hz, 1H), 6.98 (d,  $J = 8.8$  Hz, 2H), 7.48–7.62 (m, 6H);  $^{13}\text{C}$  NMR ( $\text{CDCl}_3$ ):  $\delta$  11.5, 14.1, 21.7, 22.7, 26.1, 29.26, 29.31, 29.4, 31.8, 68.1, 114.9, 126.7, 127.5, 128.0, 124.4 (dt,  $J = 253.8, 8.8$  Hz), 131.3, 132.6, 133.7 (t,  $J = 23.1$  Hz), 137.8 (t,  $J = 21.2$  Hz), 141.3, 159.1;  $^{19}\text{F}$  NMR ( $\text{CDCl}_3$ ):  $\delta$   $-123.55$  (s, 2F),  $-127.90$  (s, 2F); IR (KBr):  $\nu$  3038, 2926, 2852, 1885, 1654, 1606, 1579, 1529, 1500, 1253, 1132, 907, 864  $\text{cm}^{-1}$ ; HRMS (FAB) Calcd for  $\text{C}_{28}\text{H}_{32}\text{F}_4\text{O}$   $[\text{M}]^+$ : 460.2389, Found: 460.2382.

**Reference:**

<sup>1</sup> Kumon, T.; Hashishita, S.; Kida, T.; Yamada, S.; Ishihara, T.; Konno, T. *Beilstein J. Org. Chem.* **2018**, *14*, 148–154.

## 2. Synthesis of 2b and 2c

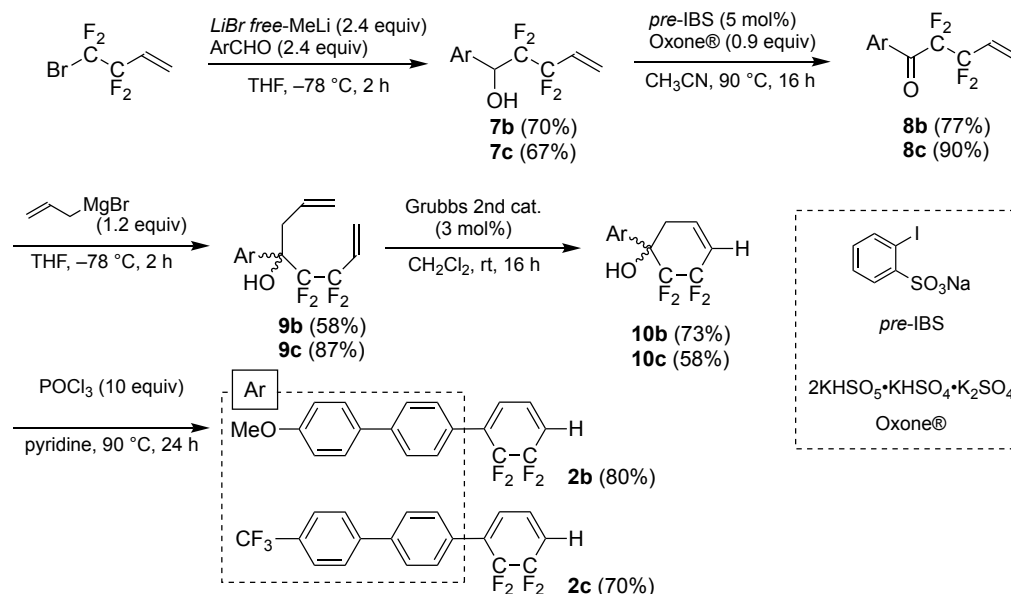

**Scheme S2.** Synthetic procedure of **2b** and **2c** starting from commercially available 4-bromo-3,3,4,4-tetrafluorobut-1-ene.

### 2-1. Typical procedure for the synthesis of 2,2,3,3-Tetrafluoro-1-[4-(4-trifluoromethylphenyl)phenyl]pent-4-en-1-ol (**7c**)

In a two-necked round-bottomed flask, equipped with a magnetic stirrer bar and inlet tube for argon, 4-bromo-3,3,4,4-tetrafluorobut-1-ene (3.15 g, 15 mmol), 4-{4-(trifluoromethyl)phenyl}benzaldehyde (9.01 g, 36 mmol) and THF (30 mL) were placed, and then the reaction flask was immersed in a cooling bath to be cooled to  $-78^\circ\text{C}$ . To the solution was added dropwise MeLi (LiBr-free, 1.06 M in  $\text{Et}_2\text{O}$ , 22 mL) at  $-78^\circ\text{C}$  and the whole solution was stirred at that temperature. After stirring for 2 h, an aqueous saturated solution of  $\text{NH}_4\text{Cl}$  was added to the resultant, after which the resulting solution was allowed to warm to room temperature. The reaction mixture was extracted with EtOAc three times and the combined organic layers were washed with brine, and then dried over anhydrous  $\text{Na}_2\text{SO}_4$ . The crude product was obtained after filtration, followed by removing solvent using a rotary evaporator. The residue was purified by silica gel column chromatography (eluent: hexane/AcOEt = 10/1) to afford the corresponding bishmoallyl alcohol **7c** in 67% yield (3.89 g, 10.0 mmol).

### 2,2,3,3-Tetrafluoro-1-[4-(4-trifluoromethylphenyl)phenyl]pent-4-en-1-ol (**7c**)

Yield: 67% (3.89 g, 10.0 mmol); White solid; M.p.:  $108.0\text{--}109.5^\circ\text{C}$ ;  $^1\text{H}$  NMR ( $\text{CDCl}_3$ ):  $\delta$  2.54 (brs, 1H), 5.24 (dd,  $J = 17.2, 7.2$  Hz, 1H), 5.70 (d,  $J = 10.8$  Hz, 1H), 5.89 (d,  $J = 15.2$  Hz, 1H), 5.97–6.13 (m, 1H), 7.57 (d,  $J = 8.4$  Hz, 2H), 7.63 (d,  $J = 8.4$  Hz, 2H), 7.70 (s, 4H);  $^{13}\text{C}$  NMR ( $\text{CDCl}_3$ ):  $\delta$  71.7 (dd,  $J = 29.3, 23.5$  Hz), 123.8 (t,  $J = 9.6$  Hz), 125.8 (q,  $J = 3.6$  Hz), 126.8 (t,  $J = 24.1$  Hz), 127.2, 127.4, 128.7, 129.6 (d,  $J = 33.0$  Hz), 135.0, 140.6, 143.9;  $^{19}\text{F}$  NMR ( $\text{CDCl}_3$ ):  $\delta$   $-63.31$  (s, 3F),  $-113.22$  (dd,  $J = 264.3, 12.0$  Hz, 1F),  $-114.07$  (dd,  $J = 264.3, 12.0$  Hz, 1F),  $-120.02$  (d,  $J = 275.2$  Hz, 1F),  $-128.00$  (dd,  $J = 275.2, 16.2$  Hz, 1F); IR (KBr):  $\nu$  3419, 2362, 2357, 1923, 1617, 1566, 1503, 1421, 1400, 1006, 861, 835, 733  $\text{cm}^{-1}$ ; HRMS (FAB) Calcd for  $\text{C}_{18}\text{H}_{13}\text{F}_7\text{O}$   $[\text{M}]^+$ : 378.0855, Found: 378.0849.

### 2,2,3,3-Tetrafluoro-1-[4-(4-methoxyphenyl)phenyl]pent-4-en-1-ol (7b)

Yield: 70% (4.76 g, 14.0 mmol); M.p.: 172.3–173.5 °C; <sup>1</sup>H NMR (CDCl<sub>3</sub>): δ 3.73 (brs, 1H), 3.83 (s, 3H), 5.16 (dd, *J* = 17.56, 7.00 Hz, 1H), 5.63 (d, *J* = 11.08 Hz, 1H), 5.85 (dt, *J* = 8.68, 1.98 Hz, 1H), 5.98–6.11 (m, 1H), 6.76 (s, 2H), 6.95 (t, *J* = 8.56 Hz, 2H), 7.45–7.56 (m, 4H); <sup>13</sup>C NMR (CDCl<sub>3</sub>): δ 55.5, 72.0 (dd, *J* = 29.1, 22.8 Hz), 114.4, 115.6 (tm, *J* = 255.76 Hz), 115.9 (tm, *J* = 257.0 Hz), 123.7 (t, *J* = 9.6 Hz), 126.8, 127.1 (t, *J* = 24.0 Hz), 128.3, 128.6, 133.1, 133.6, 141.8, 159.5; <sup>19</sup>F NMR (CDCl<sub>3</sub>, C<sub>6</sub>F<sub>6</sub>): δ –128.66 (dd, *J* = 274.1, 18.1 Hz, 1F), –120.25 (dt, *J* = 135.9, 5.8 Hz, 1F), –115.08 (ddd, *J* = 262.4, 12.5, 4.2 Hz, 1F), –113.70 (dd, *J* = 262.5, 11.4 Hz, 1F); IR (KBr): ν 3421, 3036, 2956, 2839, 1919, 1718, 1649, 1609, 1583, 1565, 1442, 1339, 1270, 1013, 991, 827 cm<sup>–1</sup>; HRMS (FAB) Calcd for C<sub>18</sub>H<sub>16</sub>F<sub>4</sub>O<sub>2</sub> [M]<sup>+</sup>: 340.1086, Found: 340.1096.

### 2-2. Typical procedure for the synthesis of 2,2,3,3-tetrafluoro-1-[4-(4-trifluoromethylphenyl)phenyl]pent-4-en-1-one (8c)

A solution of tetrafluorinated alcohol (7c) (2.09 g, 5.5 mmol) and Oxone<sup>®</sup> (3.04 g, 4.95 mmol) in CH<sub>3</sub>CN (27.5 mL) was heated at 90 °C in the presence of *pre*-IBS (0.095 g, 0.27 mmol). After stirring for 16 h, the resulting mixture was cooled to room temperature and filtered by silica gel, which was successively washed with EtOAc, then concentrated in *vacuo*. The residue was purified by silica gel column chromatography (eluent: hexane/EtOAc = 10/1) to afford the corresponding ketone 8c in 90% yield (1.86 g, 4.95 mmol).

### 2,2,3,3-tetrafluoro-1-[4-(4-trifluoromethylphenyl)phenyl]pent-4-en-1-one (8c)

Yield: 90% (1.86 g, 4.95 mmol); Pale yellow liquid; <sup>1</sup>H NMR (CDCl<sub>3</sub>): δ 5.78 (d, *J* = 11.2 Hz, 1H), 5.96 (d, *J* = 17.6 Hz, 1H), 6.08–6.24 (m, 1H), 7.73 (d, *J* = 8.0 Hz, 2H), 7.74 (s, 4H), 8.21 (d, *J* = 8.0 Hz, 2H); <sup>13</sup>C NMR (CDCl<sub>3</sub>): δ 112.0 (tt, *J* = 265.6, 36.7 Hz), 114.7 (tt, *J* = 250.8, 29.4 Hz), 124.1 (q, *J* = 271.4 Hz), 124.8 (t, *J* = 9.6 Hz), 125.95, 125.98, 127.5, 127.6, 130.6 (q, *J* = 32.3 Hz), 131.0, 131.7, 142.8, 145.8, 185.4 (t, *J* = 26.4 Hz); <sup>19</sup>F NMR (CDCl<sub>3</sub>): δ –62.70 (s, 3F), –113.34 (d, *J* = 10.9 Hz, 2F), –114.34 (s, 2F); IR (neat): ν 3396, 3055, 2946, 1932, 1701, 1606, 1558, 1112, 1017, 964, 828, 737 cm<sup>–1</sup>; HRMS (FAB) Calcd for C<sub>18</sub>H<sub>12</sub>F<sub>7</sub>O [M+H]<sup>+</sup>: 377.0771, Found: 377.0781.

### 2,2,3,3-tetrafluoro-1-[4-(4-methoxyphenyl)phenyl]pent-4-en-1-one (8b)

Yield: 77% (0.78 g, 2.31 mmol); White solid; M.p.: 53.2–54.7 °C; <sup>1</sup>H NMR (CDCl<sub>3</sub>): δ 3.87 (s, 3H), 5.77 (d, *J* = 11.2 Hz, 1H), 5.95 (dt, *J* = 17.2, 2.0 Hz, 1H), 6.06–6.23 (m, 1H), 7.02 (d, *J* = 9.2 Hz, 2H), 7.60 (d, *J* = 9.2 Hz, 2H), 7.69 (d, *J* = 8.8 Hz, 2H), 8.15 (d, *J* = 8.8 Hz, 2H); <sup>13</sup>C NMR (CDCl<sub>3</sub>): δ 55.4, 112.1 (tt, *J* = 265.6, 35.9 Hz), 114.5, 114.6 (tt, *J* = 250.8, 30.8 Hz), 124.7 (t, *J* = 9.6 Hz), 126.3 (t, *J* = 23.4 Hz), 126.6, 128.5, 130.3, 131.0, 131.6, 146.9, 160.3, 185.4 (t, *J* = 26.5 Hz); <sup>19</sup>F NMR (CDCl<sub>3</sub>): δ –113.38 (d, *J* = 9.4 Hz, 2F), –114.19 (s, 2F); IR (KBr): ν 2971, 2843, 1697, 1601, 1577, 1555, 1528, 1459, 1444, 1278, 1253, 1183, 1012, 825 cm<sup>–1</sup>; HRMS (FAB) Calcd for C<sub>18</sub>H<sub>14</sub>F<sub>4</sub>O<sub>2</sub> [M]<sup>+</sup>: 338.0930, Found: 338.0924.

### 2-3. Typical procedure for the synthesis of 5,5,6,6-tetrafluoro-4-(4-trifluoromethylphenyl)phenylocta-1,7-dien-4-ol (**9c**)

To a solution of tetrafluorinated ketone **8c** (1.88 g, 5.0 mmol) in Et<sub>2</sub>O (20 mL) was added dropwise allyl magnesium bromide (0.60 M in diethyl ether, 10 mL, 6.0 mmol) at -78 °C and the whole was stirred at the same temperature for 2 h. The reaction mixture was quenched with saturated NH<sub>4</sub>Cl aqueous and then the whole was extracted with EtOAc three times. The combined organic layers were dried over anhydrous Na<sub>2</sub>SO<sub>4</sub>, then filtered, and concentrated in *vacuo*. The residue was purified by silica gel column chromatography (hexane : EtOAc = 10 : 1, R<sub>f</sub> = 0.12) to give the corresponding 1,7-octadiene **9c** in 87% yield (1.82 g, 4.35 mmol).

#### 5,5,6,6-tetrafluoro-4-(4-trifluoromethylphenyl)phenylocta-1,7-dien-4-ol (**9c**)

Yield: 87% (1.82 g, 4.35 mmol); Pale yellow liquid; <sup>1</sup>H NMR (CDCl<sub>3</sub>): δ 2.67 (brs, 1H), 2.98 (dd, *J* = 14.0, 8.0 Hz, 1H), 3.11 (dd, *J* = 14.0, 6.0 Hz, 1H), 5.21 (d, *J* = 10.4 Hz, 1H), 5.26 (d, *J* = 17.2 Hz, 1H), 5.44–5.59 (m, 2H), 5.70 (dt, *J* = 17.2, 2.4 Hz, 1H), 5.88–6.04 (m, 1H), 7.63 (d, *J* = 8.4 Hz, 2H), 7.68 (d, *J* = 8.4 Hz, 2H), 7.72 (s, 4H); <sup>13</sup>C NMR (CDCl<sub>3</sub>): δ 40.9, 76.6 (t, *J* = 24.9 Hz), 115.8 (tt, *J* = 251.5, 33.8 Hz), 116.6 (tt, *J* = 261.9, 30.8 Hz), 121.6, 122.0 (t, *J* = 10.3 Hz), 124.3 (q, *J* = 272.1 Hz), 125.7 (q, *J* = 3.6 Hz), 126.8, 127.3, 127.4, 127.9 (t, *J* = 23.4 Hz), 129.5 (q, *J* = 32.2 Hz), 130.8, 138.0, 139.3, 143.9; <sup>19</sup>F NMR (CDCl<sub>3</sub>, C<sub>6</sub>F<sub>6</sub>): δ -63.32 (s, 3F), -109.24 (d, *J* = 261.6 Hz, 1F), -111.96 (d, *J* = 261.6 Hz, 1F), -120.63 (s, 1F), -120.69 (s, 1F); IR (neat): ν 3548, 3090, 2985, 1924, 1617, 1398, 1235, 1168, 1071, 978, 733 cm<sup>-1</sup>; HRMS (FAB) Calcd for C<sub>21</sub>H<sub>17</sub>F<sub>7</sub>O [M]<sup>+</sup>: 418.1168, Found: 418.1166.

#### 5,5,6,6-tetrafluoro-4-(4-methoxyphenyl)phenylocta-1,7-dien-4-ol (**9b**)

Yield: 58% (0.51 g, 1.33 mmol); colorless liquid; <sup>1</sup>H NMR (CDCl<sub>3</sub>): δ 2.70 (brs, 1H), 2.97 (dd, *J* = 14.4, 8.4 Hz, 1H), 3.13 (dd, *J* = 14.4, 6.0 Hz, 1H), 3.87 (s, 3H), 5.21 (d, *J* = 10.0 Hz, 1H), 5.26 (d, *J* = 17.2 Hz, 1H), 5.48–5.61 (m, 2H), 5.71 (d, *J* = 15.6 Hz, 1H), 5.87–6.03 (m, 1H), 7.02 (d, *J* = 8.8 Hz, 2H), 7.60 (d, *J* = 8.8 Hz, 2H), 7.61 (s, 4H); <sup>13</sup>C NMR (CDCl<sub>3</sub>): δ 40.8, 55.2, 76.6 (t, *J* = 24.2 Hz), 114.2, 115.7 (tt, *J* = 251.5, 33.0 Hz), 116.7 (tt, *J* = 261.9, 31.6 Hz), 121.3, 121.8 (t, *J* = 10.3 Hz), 126.1, 127.1, 127.9 (t, *J* = 22.4 Hz), 128.0, 131.0, 132.8, 136.1, 140.3, 159.2; <sup>19</sup>F NMR (CDCl<sub>3</sub>): δ -108.41 (dd, *J* = 261.6, 10.9 Hz, 1F), -110.94 (dd, *J* = 261.6, 12.0 Hz, 1F), -119.68 (s, 2F); IR (neat): ν 3558, 3082, 3059, 2962, 2909, 2838, 1925, 1887, 1712, 1639, 1561, 1399, 1211, 1000, 859, 740 cm<sup>-1</sup>; HRMS (FAB) Calcd for C<sub>21</sub>H<sub>20</sub>F<sub>4</sub>O<sub>2</sub> [M]<sup>+</sup>: 380.1399, Found: 380.1407.

### 2-4. Typical procedure for the synthesis of 5,5,6,6-tetrafluoro-1-(4-trifluoromethylphenyl)phenylcyclohex-3-en-1-ol (**10c**)

A solution of 1,7-octadiene **9c** (1.67 g, 4.0 mmol) in CH<sub>2</sub>Cl<sub>2</sub> (20 mL) in the presence of Grubbs 2nd Generation cat. (0.10 g, 0.12 mmol) was stirred at room temperature for 16 h. The reaction mixture was passed through silica gel, eluting with EtOAc, and the filtrate was concentrated in *vacuo*. The residue was purified by silica gel column chromatography (hexane : EtOAc = 3 : 1, R<sub>f</sub> = 0.32) to give the corresponding alcohol **10c** in 58% yield (0.90 g, 2.32 mmol).

### **5,5,6,6-tetrafluoro-1-(4-trifluoromethylphenyl)phenylcyclohex-3-en-1-ol (10c)**

Yield: 58% (0.90 g, 2.32 mmol); White solid; M.p.: 140.5–141.7 °C; <sup>1</sup>H NMR (CDCl<sub>3</sub>): δ 2.65–2.77 (m, 2H), 3.08–3.20 (m, 1H), 5.93–6.03 (m, 1H), 6.28–6.36 (m, 1H), 7.66 (d, *J* = 8.8 Hz, 2H), 7.71 (s, 4H), 7.73 (d, *J* = 8.8 Hz, 2H); <sup>13</sup>C NMR (CDCl<sub>3</sub>): δ 38.6, 75.1 (t, *J* = 24.1 Hz), 109.5–118.0 (m, 2C for CF<sub>2</sub>CF<sub>2</sub>), 121.3 (t, *J* = 27.1 Hz), 124.2 (q, *J* = 272.2 Hz), 125.8 (q, *J* = 3.7 Hz), 127.2, 127.3, 127.4, 129.7 (q, *J* = 32.2 Hz), 134.2 (t, *J* = 10.3 Hz), 137.2, 140.2, 143.7; <sup>19</sup>F NMR (CDCl<sub>3</sub>): δ –62.42 (s, 3F), –99.74 (d, *J* = 287.6 Hz, 1F), –116.47 (d, *J* = 287.6 Hz, 1F), –120.74 (dd, *J* = 261.6, 10.9 Hz, 1F), –137.46 (d, *J* = 261.6 Hz, 1F); IR (KBr): ν 3664, 3474, 3047, 2935, 1929, 1663, 1586, 1503, 1272, 1016, 957, 942, 789, 738 cm<sup>–1</sup>; HRMS (FAB) Calcd for C<sub>19</sub>H<sub>13</sub>F<sub>7</sub>O [M]<sup>+</sup>: 390.0855, Found: 390.0862.

### **5,5,6,6-tetrafluoro-1-(4-methoxyphenyl)phenylcyclohex-3-en-1-ol (10b)**

Yield: 73% (0.31 g, 0.88 mmol); White solid; M.p.: 147.7–148.9 °C; <sup>1</sup>H NMR (CDCl<sub>3</sub>): δ 2.71 (s, 2H), 3.13 (m, 1H), 3.87 (s, 3H), 5.92–6.02 (m, 1H), 6.27–6.35 (m, 1H), 7.00 (d, *J* = 8.8 Hz, 2H), 7.56 (d, *J* = 8.8 Hz, 2H), 7.62 (d, *J* = 8.8 Hz, 2H), 7.67 (d, *J* = 8.8 Hz, 2H); <sup>13</sup>C NMR (CDCl<sub>3</sub>): δ 38.5, 55.3, 75.1 (t, *J* = 24.9 Hz), 112–118 (m, 2C for CF<sub>2</sub>CF<sub>2</sub>), 114.3, 121.2 (t, *J* = 26.3 Hz), 126.6, 126.9 (d, *J* = 2.9 Hz), 128.1, 132.7, 134.3 (t, *J* = 10.9 Hz), 135.5, 141.3, 159.4; <sup>19</sup>F NMR (CDCl<sub>3</sub>): δ –99.81 (d, *J* = 286.1 Hz, 1F), –116.38 (d, *J* = 286.1 Hz, 1F), –120.67 (dd, *J* = 261.6, 19.6 Hz, 1F), –137.5 (d, *J* = 261.6 Hz, 1F); IR (KBr): ν 3601, 3039, 2961, 2936, 2912, 2842, 1926, 1868, 1710, 1667, 1501, 1460, 1359, 1117, 1013, 901, 873 cm<sup>–1</sup>; HRMS (FAB) Calcd for C<sub>19</sub>H<sub>16</sub>F<sub>4</sub>O<sub>2</sub> [M]<sup>+</sup>: 352.1086, Found: 352.1084.

### **2-5. Typical procedure for the synthesis of 5,5,6,6-Tetrafluoro-1-(4-trifluoromethylphenyl)phenylcyclohexa-1,3-diene (2c)**

In a two-necked round-bottomed flask containing a teflon®-coated magnetic stirring bar, tetrafluorinated cyclohexan-1,4-diol **10c** (0.78 g, 2.0 mmol) and pyridine (10 mL) were placed. To the solution was added freshly distilled POCl<sub>3</sub> (0.54 mL, 6.0 mmol) at room temperature, the whole solution was heated at 90 °C for 24 h. After cooling the reaction mixture to room temperature, the resultant solution was poured into saturated aqueous NH<sub>4</sub>Cl solution and acidified by adding 3M HCl solution. The whole solution was extracted with AcOEt three times, and the combined organic layer was dried over anhydrous Na<sub>2</sub>SO<sub>4</sub>, filtered, and concentrated in vacuo. The residue was purified by silica column chromatography (Hexane : CH<sub>2</sub>Cl<sub>2</sub> = 10 : 1) to afford the corresponding tetrafluorinated cyclohexa-1,3-diene **2c** in 70% (0.15 g, 1.4 mmol) as a white solid.

### **5,5,6,6-Tetrafluoro-1-(4-trifluoromethylphenyl)phenylcyclohexa-1,3-diene (2c)**

Yield: 70% (0.15 g, 1.4 mmol); White solid; M.p.: 138 °C determined by DSC; <sup>1</sup>H NMR (CDCl<sub>3</sub>): δ 6.06–6.18 (m, 1H), 6.40–6.54 (m, 2H), 7.60 (d, *J* = 8.8 Hz, 2H), 7.64 (d, *J* = 8.8 Hz, 2H), 7.72 (s, 4H); <sup>13</sup>C NMR (CDCl<sub>3</sub>): δ 112.7 (tt, *J* = 249.4, 27.2 Hz), 113.4 (tt, *J* = 253.0, 26.5 Hz), 124.2 (q, *J* = 272.1 Hz), 123.4 (t, *J* = 25.6 Hz), 125.5 (t, *J* = 8.0 Hz), 125.8 (q, *J* = 3.6 Hz), 127.3, 127.4, 127.9, 129.7 (q, *J* = 32.3 Hz), 129.8 (t, *J* = 11.8 Hz), 132.6, 136.1 (t, *J* = 22.7 Hz), 140.4, 143.6; <sup>19</sup>F NMR (CDCl<sub>3</sub>): δ –62.43 (s, 3F), –121.31



(s, 2F),  $-121.72$  (s, 2F); IR (KBr):  $\nu$  3088, 2362, 1919, 1690, 1616, 1502, 1425, 1274, 1210, 968, 875, 794, 739, 729  $\text{cm}^{-1}$ ; HRMS (FAB) Calcd for  $\text{C}_{19}\text{H}_{11}\text{F}_7$   $[\text{M}]^+$ : 372.0749, Found: 372.0759.

**5,5,6,6-Tetrafluoro-1-(4-methoxyphenyl)phenylcyclohexa-1,3-diene (2b)**

Yield: 80% (0.53 g, 1.6 mmol); White solid; M.p.:  $130^\circ\text{C}$  determined by DSC;  $^1\text{H}$  NMR ( $\text{CDCl}_3$ ):  $\delta$  3.86 (s, 3H), 6.03–6.12 (m, 1H), 6.37–6.46 (m, 2H), 7.00 (d,  $J = 8.8$  Hz, 2H), 7.51–7.63 (m, 6H);  $^{13}\text{C}$  NMR ( $\text{CDCl}_3$ ):  $\delta$  55.3, 110.0–116.0 (m, 2C for  $\text{CF}_2\text{CF}_2$ ), 114.3, 122.9 (t,  $J = 25.8$  Hz), 124.7 (t,  $J = 8.0$  Hz), 126.7, 127.7, 128.1, 129.9 (t,  $J = 11.8$  Hz), 130.9, 132.6, 136.4 (t,  $J = 22.0$  Hz), 141.6, 159.5;  $^{19}\text{F}$  NMR ( $\text{CDCl}_3$ ):  $\delta$   $-121.29$  (s, 2F),  $-121.67$  (s, 2F); IR (KBr):  $\nu$  3026, 2968, 2844, 1649, 1604, 1576, 1530, 1445, 1399, 1312, 1289, 1202, 1183, 1021, 1011, 879, 787  $\text{cm}^{-1}$ ; HRMS (FAB) Calcd for  $\text{C}_{19}\text{H}_{14}\text{F}_4\text{O}$   $[\text{M}]^+$ : 334.0980, Found: 334.0980.

### 3. NMR spectrum

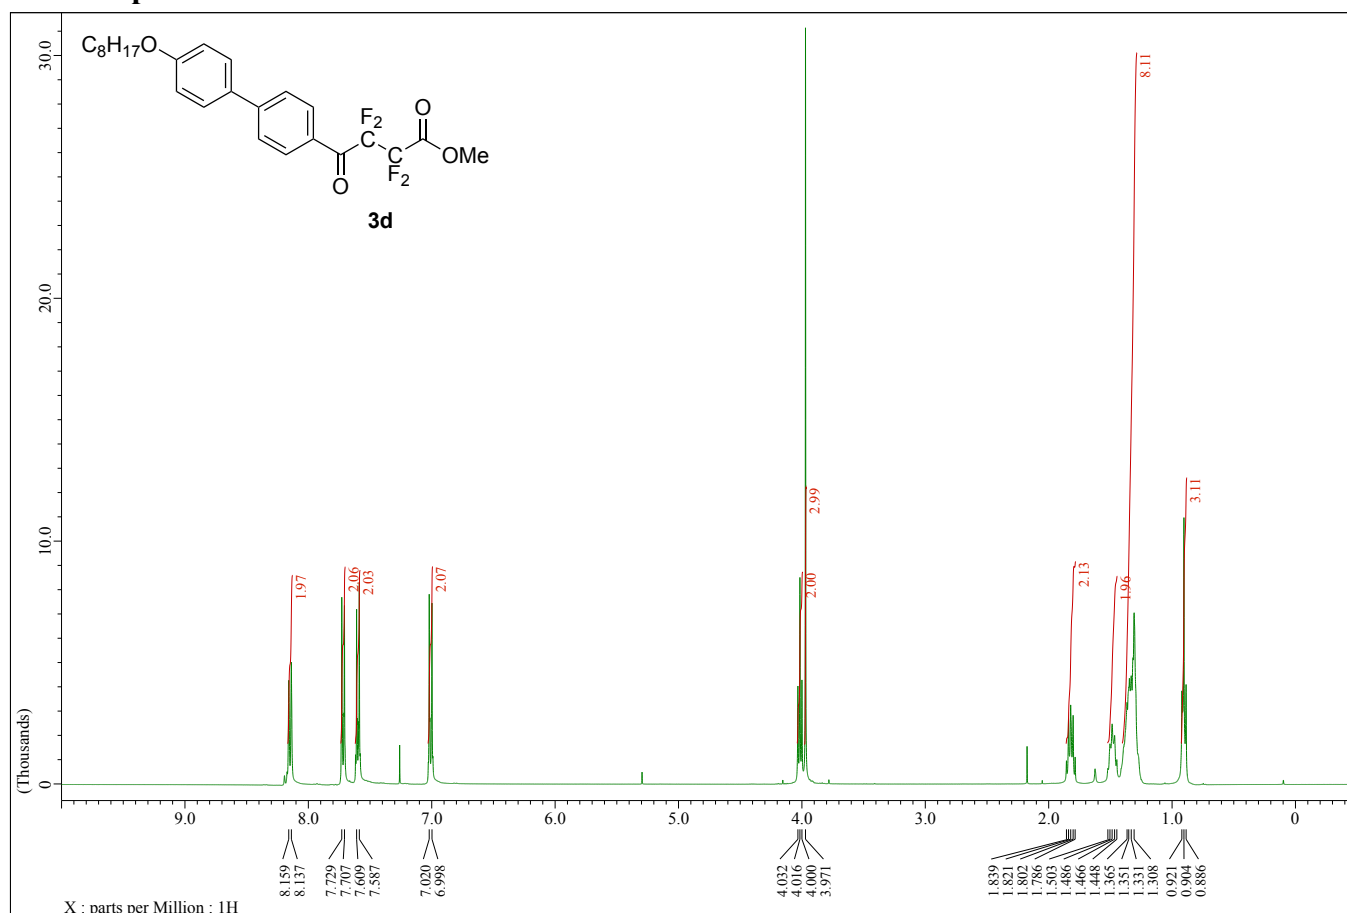

**Figure S1.** <sup>1</sup>H NMR spectrum of **3d** (CDCl<sub>3</sub>, 400 MHz).

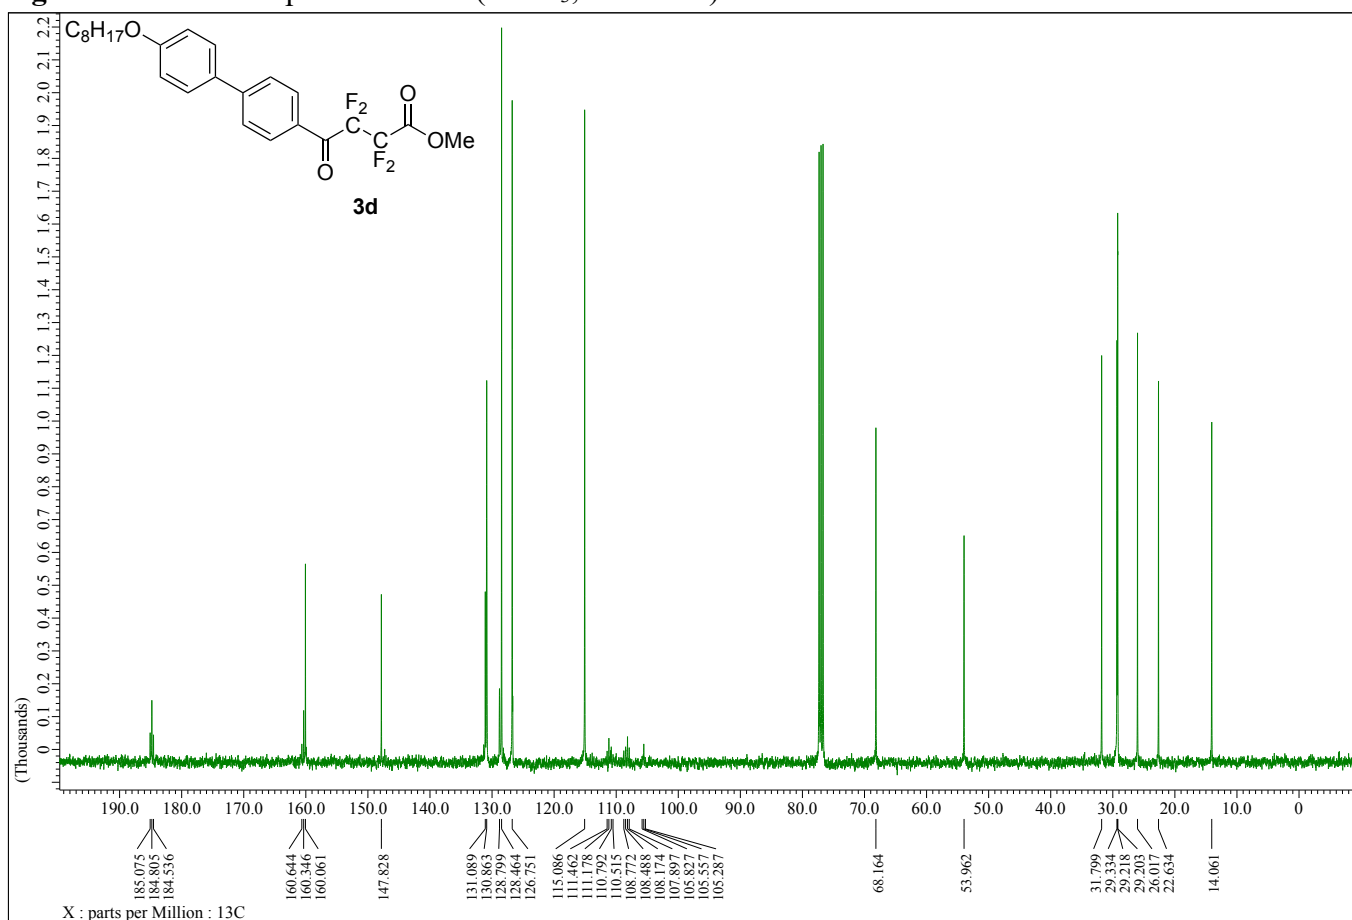

**Figure S2.** <sup>13</sup>C NMR spectrum of **3d** (CDCl<sub>3</sub>, 100 MHz).



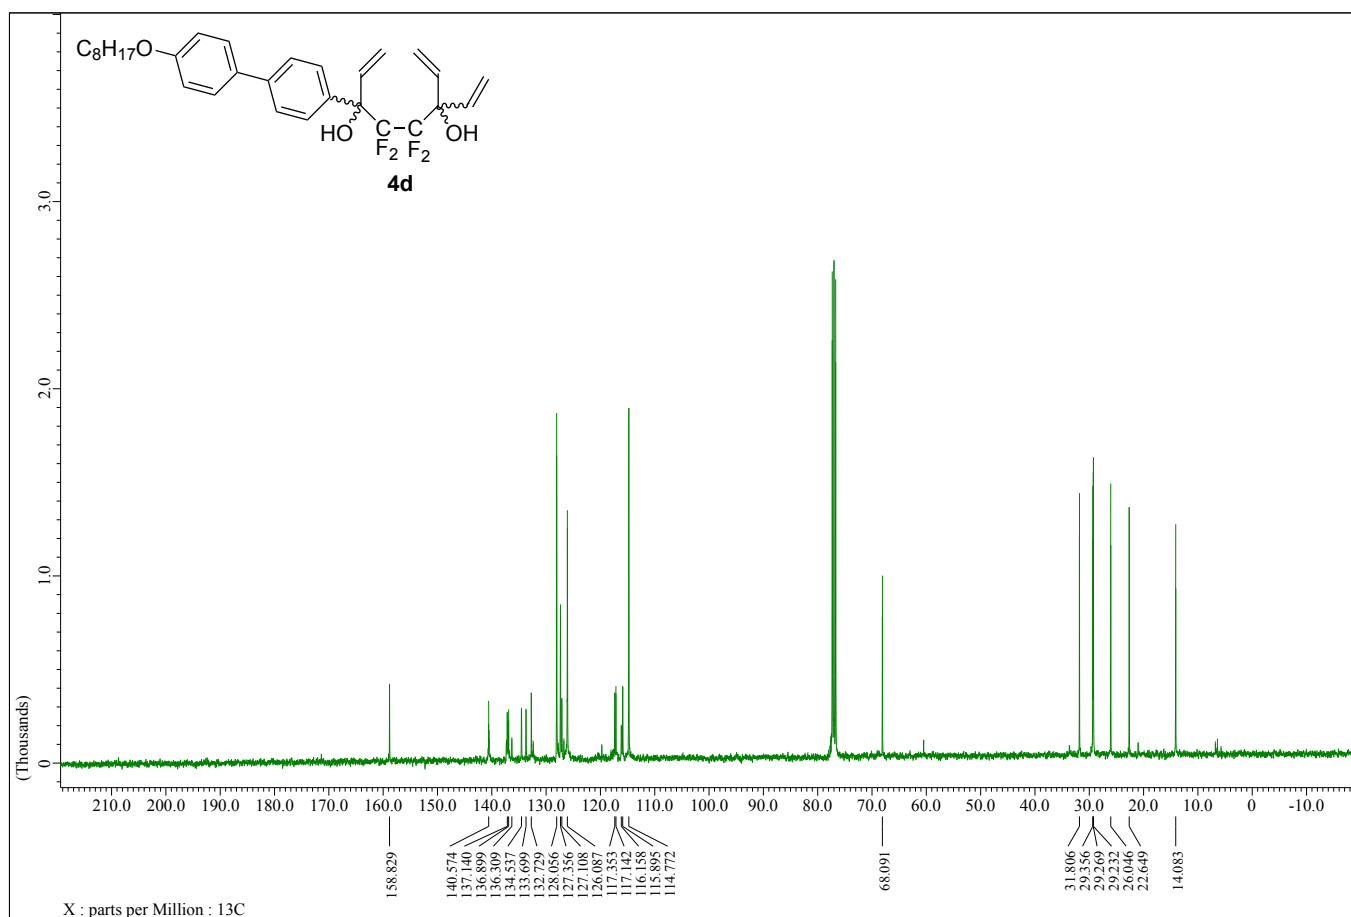

**Figure S5.**  $^{13}\text{C}$  NMR spectrum of **4d** ( $\text{CDCl}_3$ , 100 MHz).

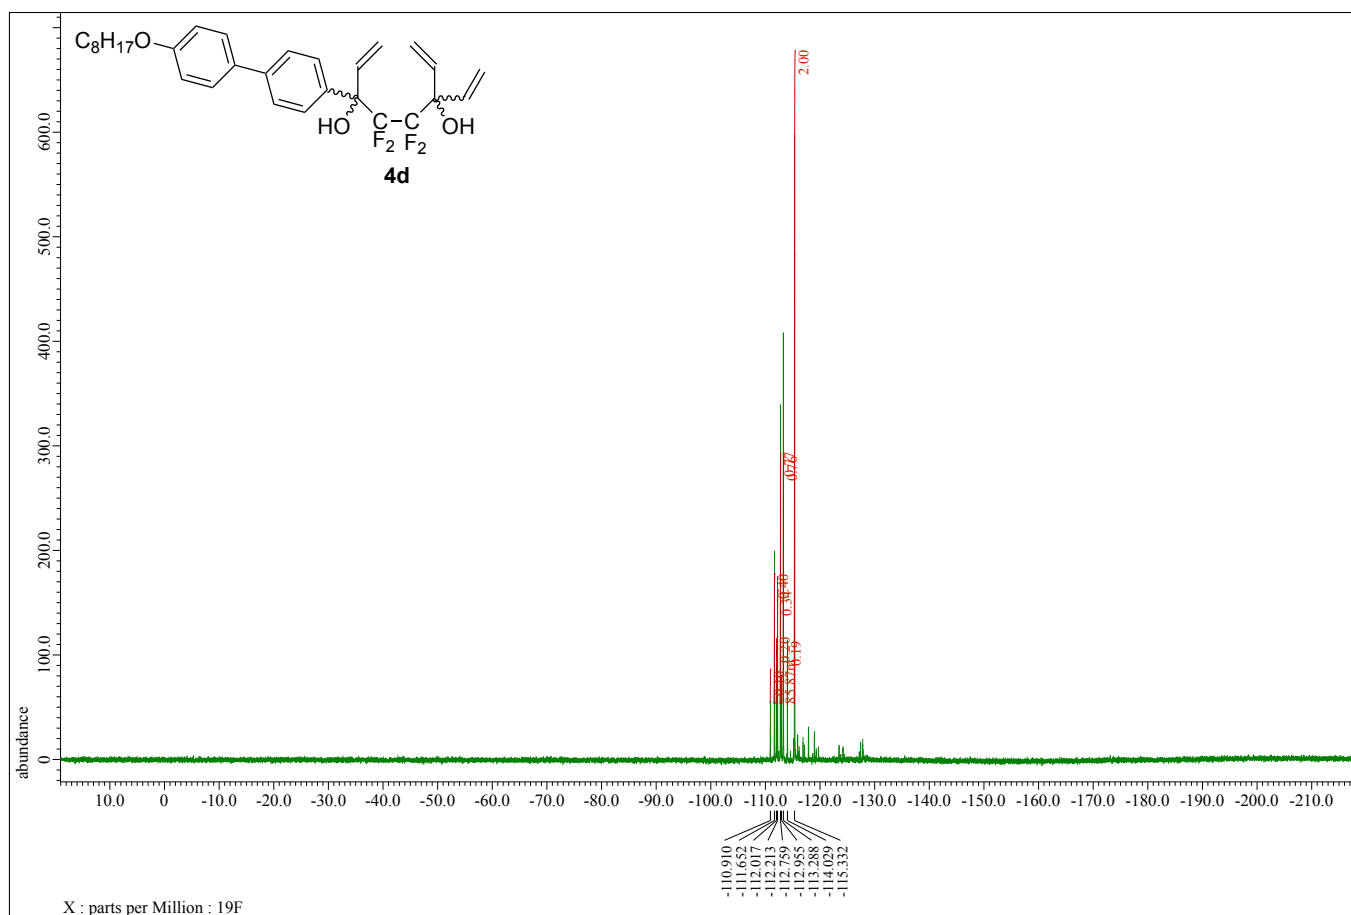

**Figure S6.**  $^{19}\text{F}$  NMR spectrum of **4d** ( $\text{CDCl}_3$ , 376 MHz).

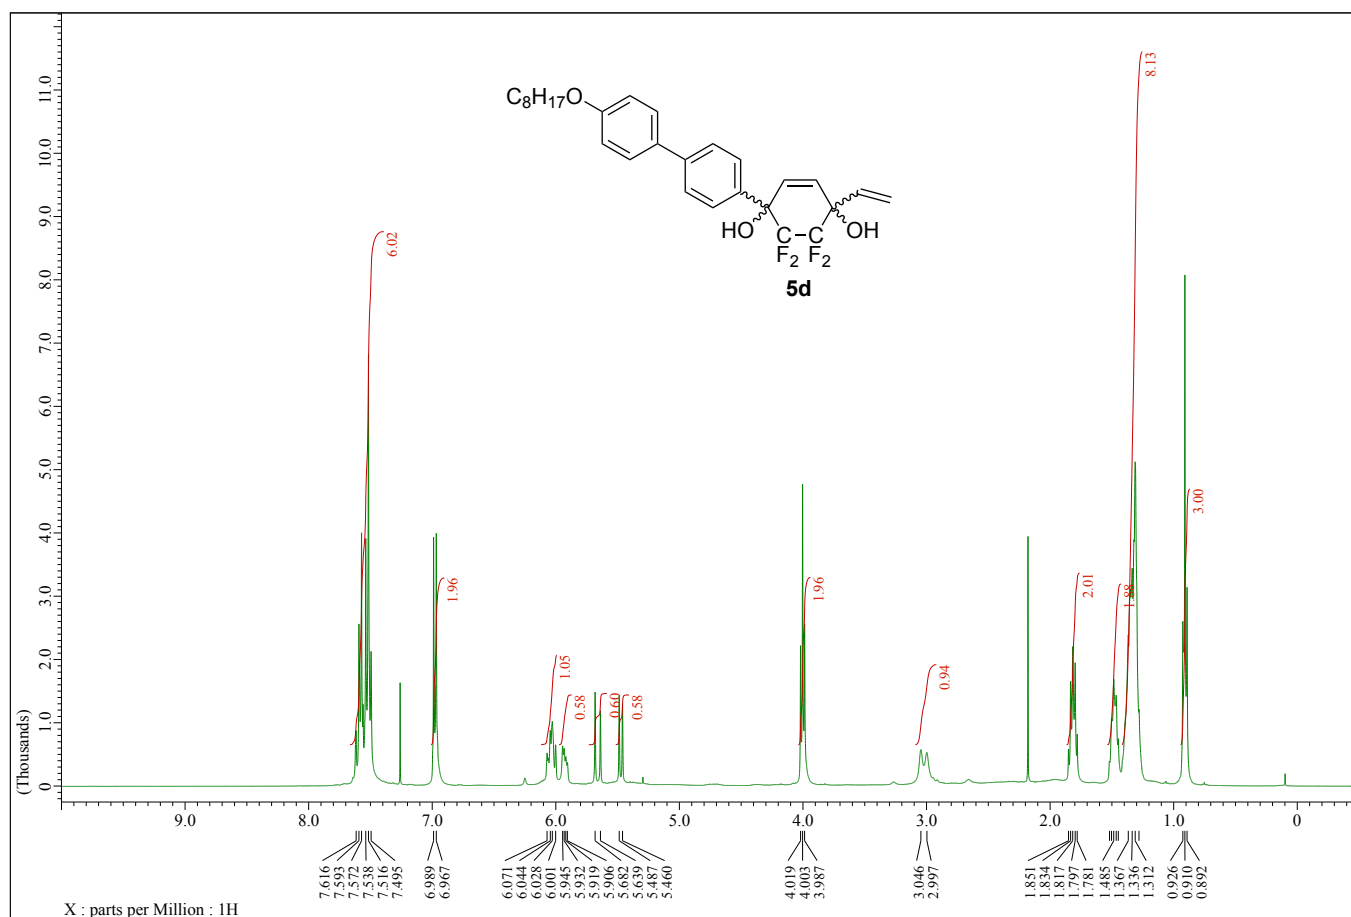

**Figure S7.** <sup>1</sup>H NMR spectrum of **5d** (CDCl<sub>3</sub>, 400 MHz).

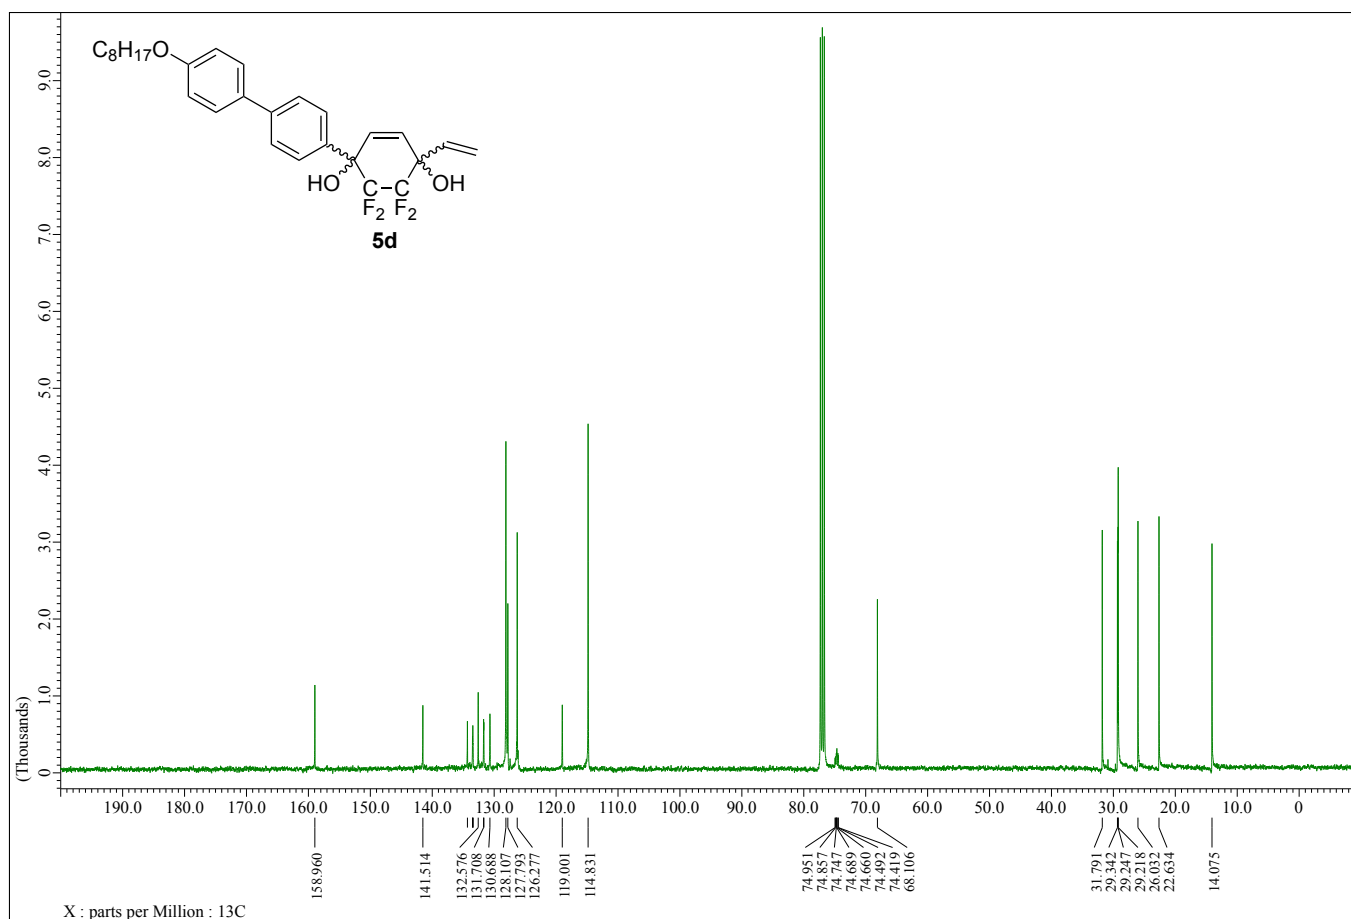

**Figure S8.** <sup>13</sup>C NMR spectrum of **5d** (CDCl<sub>3</sub>, 100 MHz).

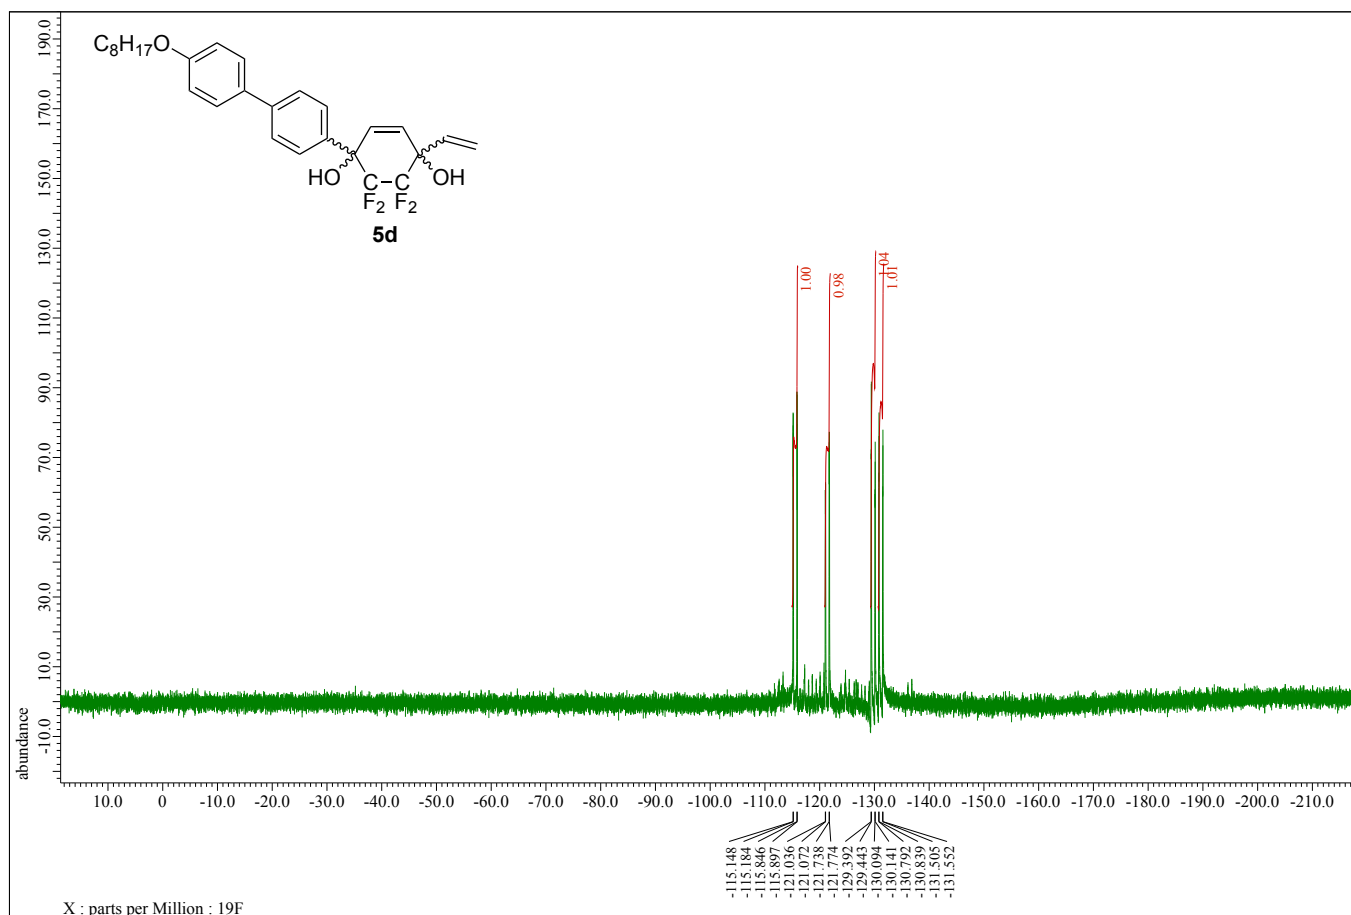

**Figure S9.** <sup>19</sup>F NMR spectrum of **5d** (CDCl<sub>3</sub>, 376 MHz).

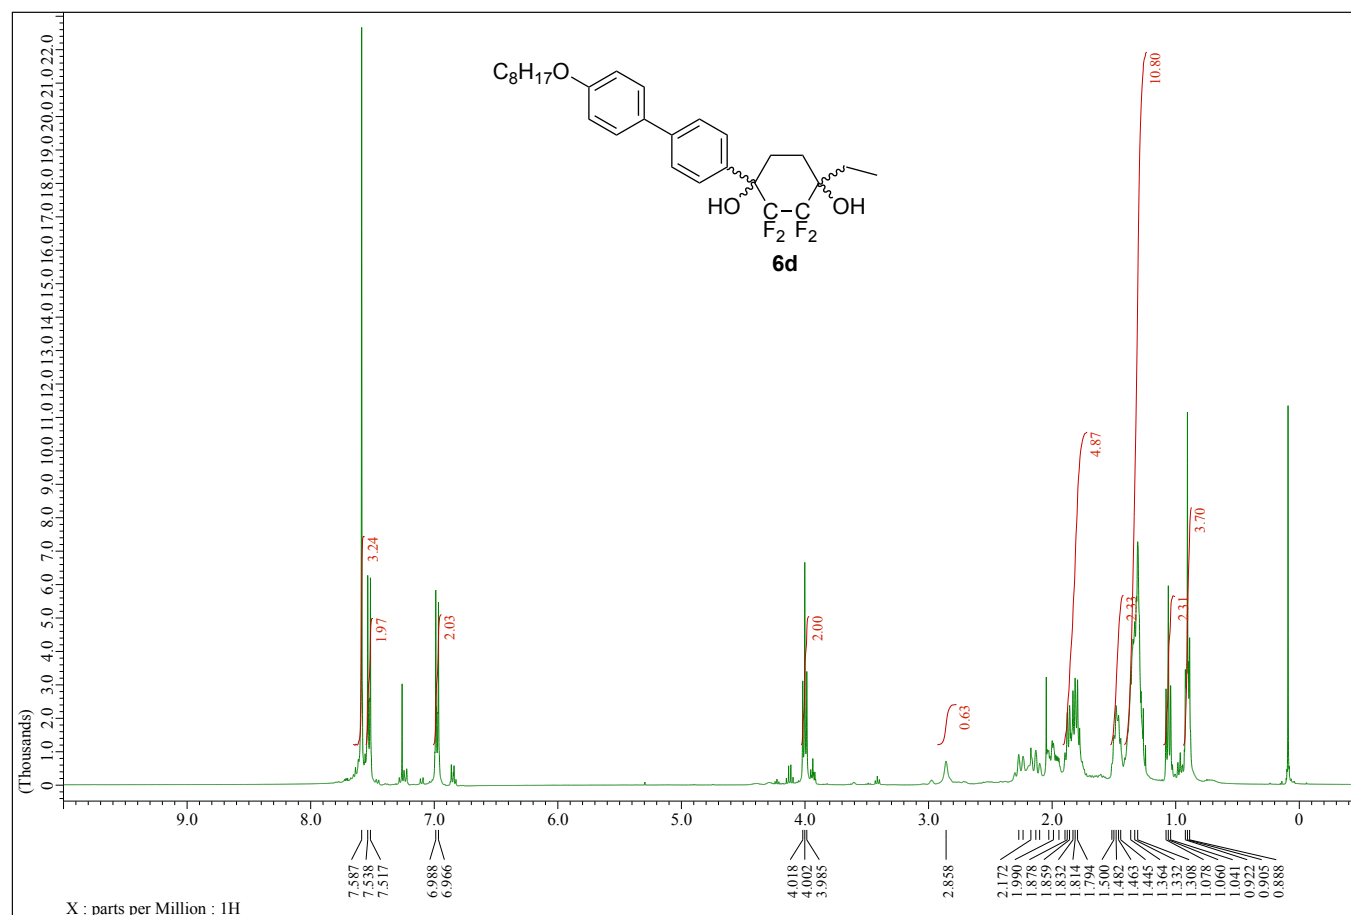

**Figure S10.** <sup>1</sup>H NMR spectrum of **6d** (CDCl<sub>3</sub>, 400 MHz).

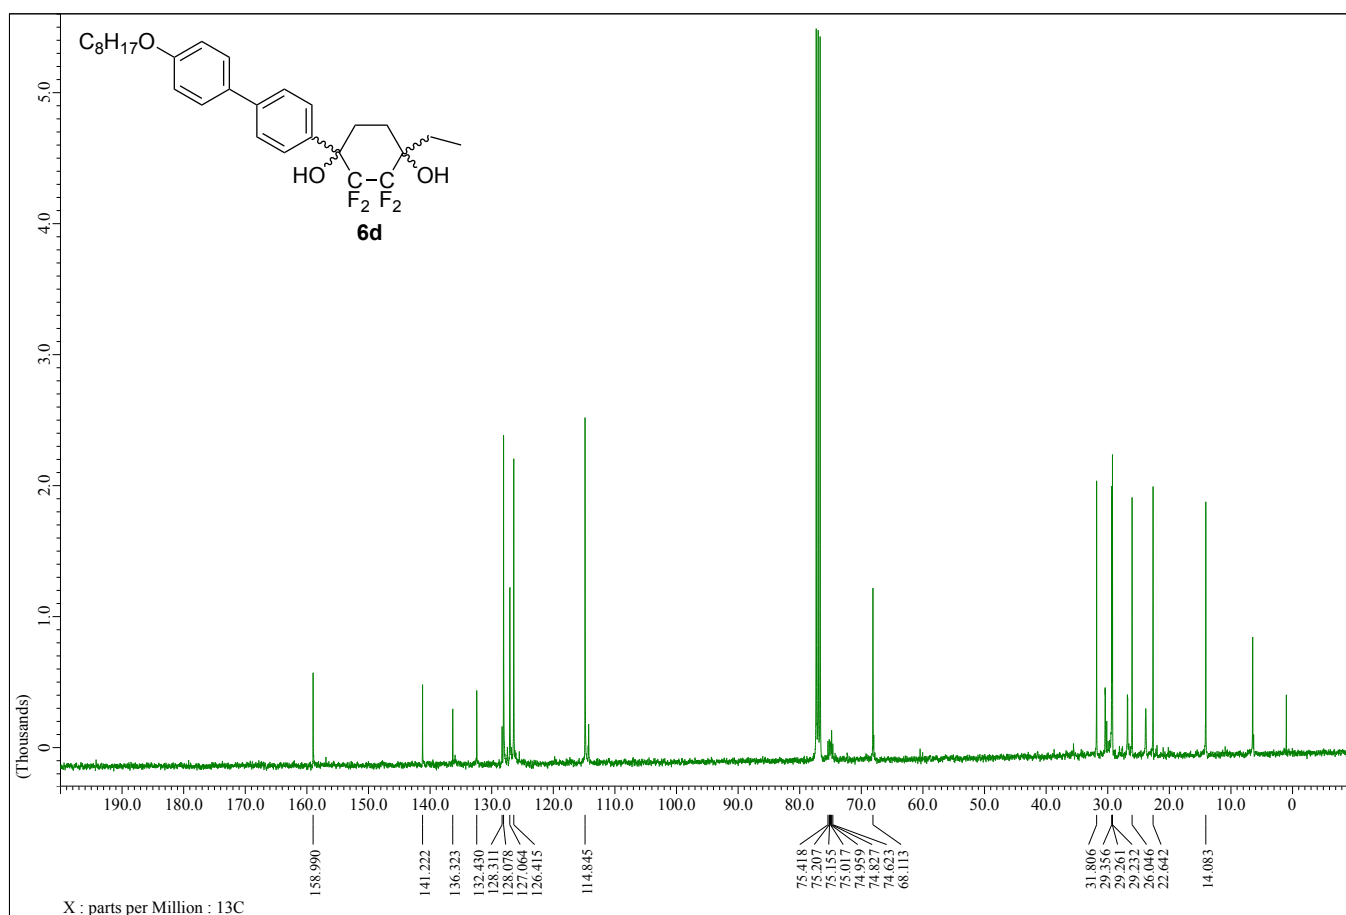

**Figure S11.** <sup>13</sup>C NMR spectrum of **6d** (CDCl<sub>3</sub>, 100 MHz).

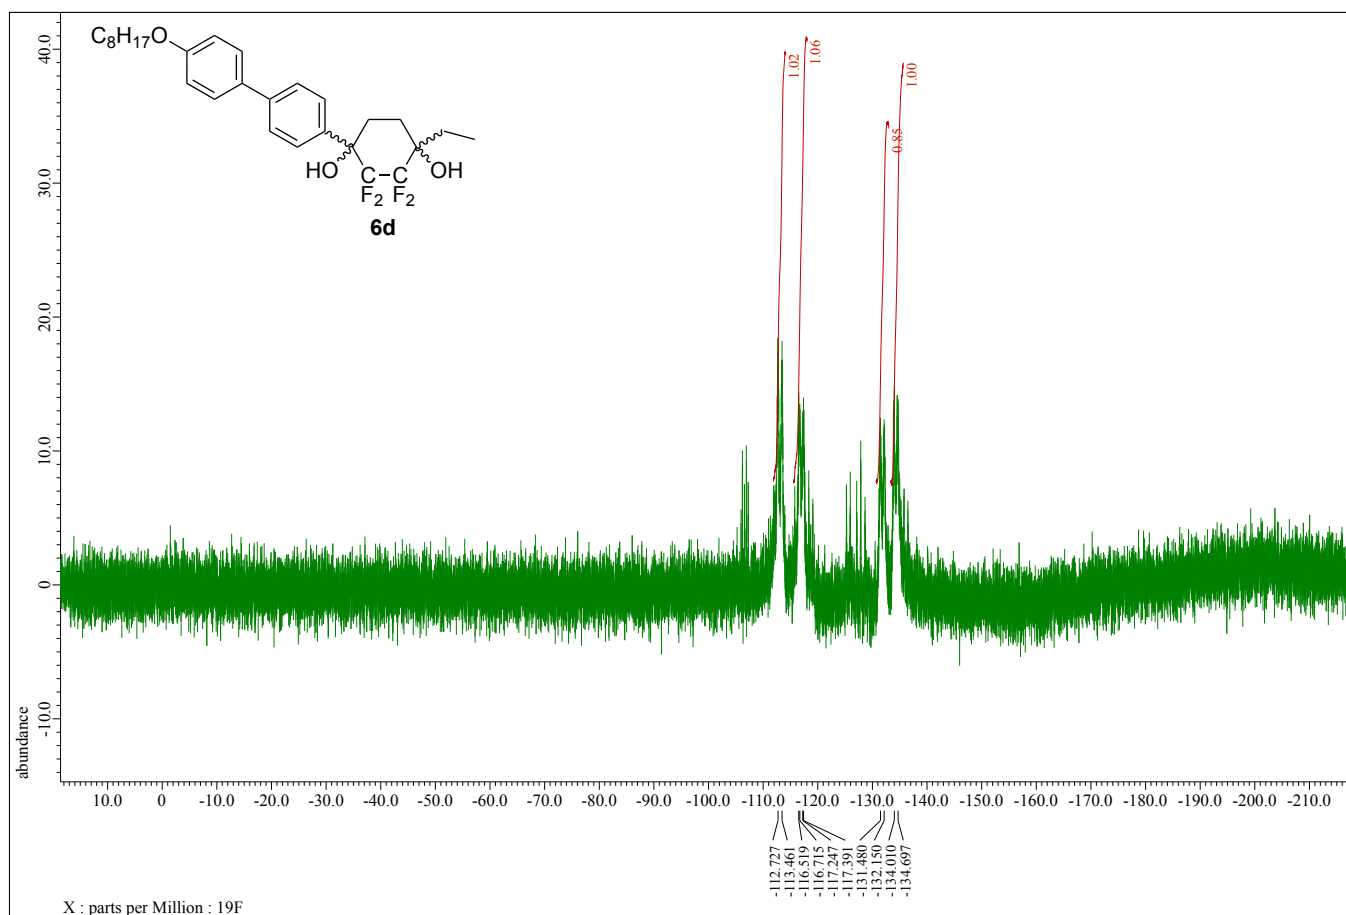

**Figure S12.** <sup>19</sup>F NMR spectrum of **6d** (CDCl<sub>3</sub>, 376 MHz).

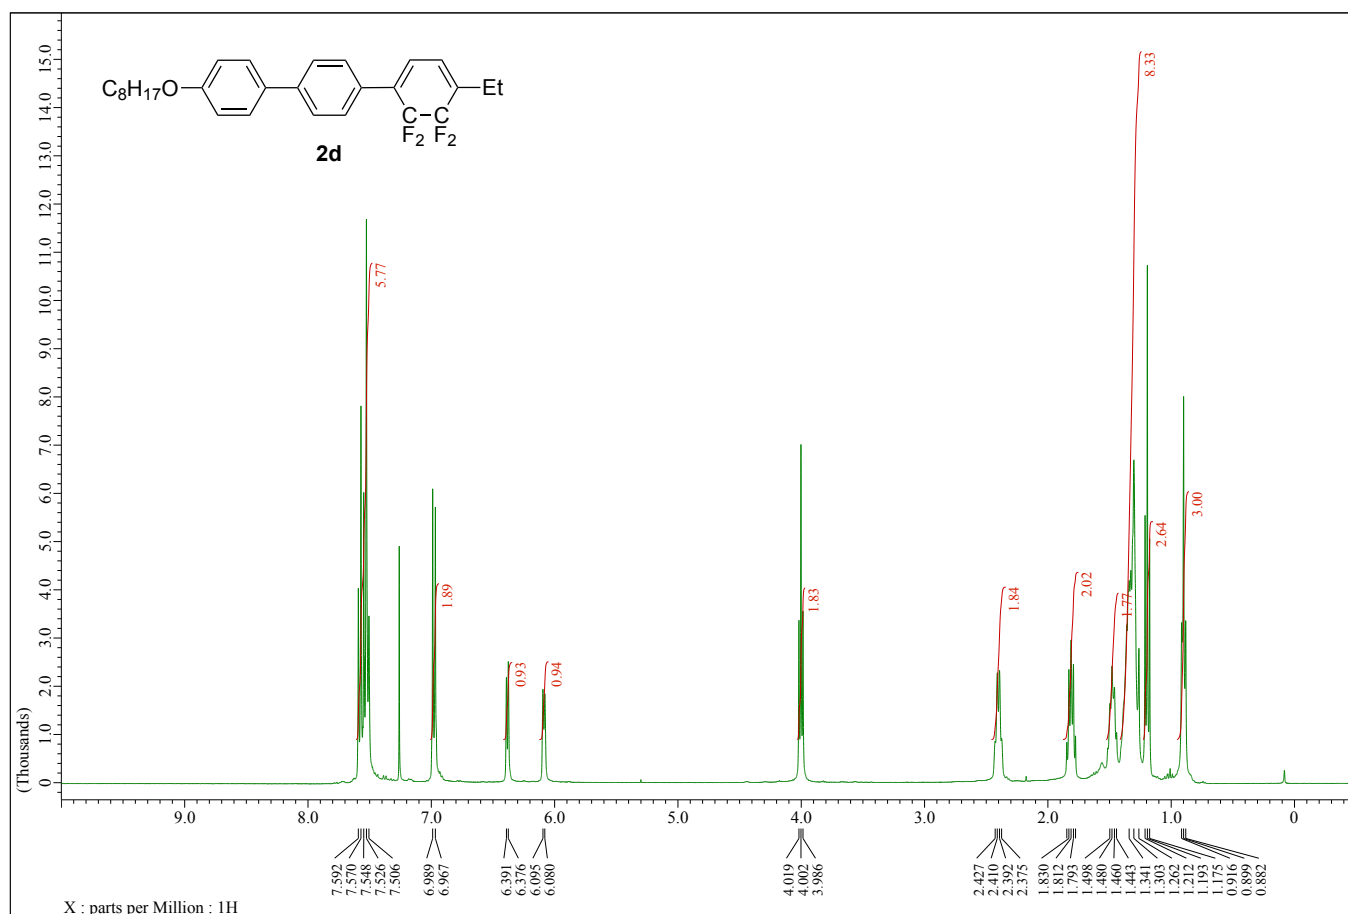

**Figure S13.** <sup>1</sup>H NMR spectrum of **2d** (CDCl<sub>3</sub>, 400 MHz).

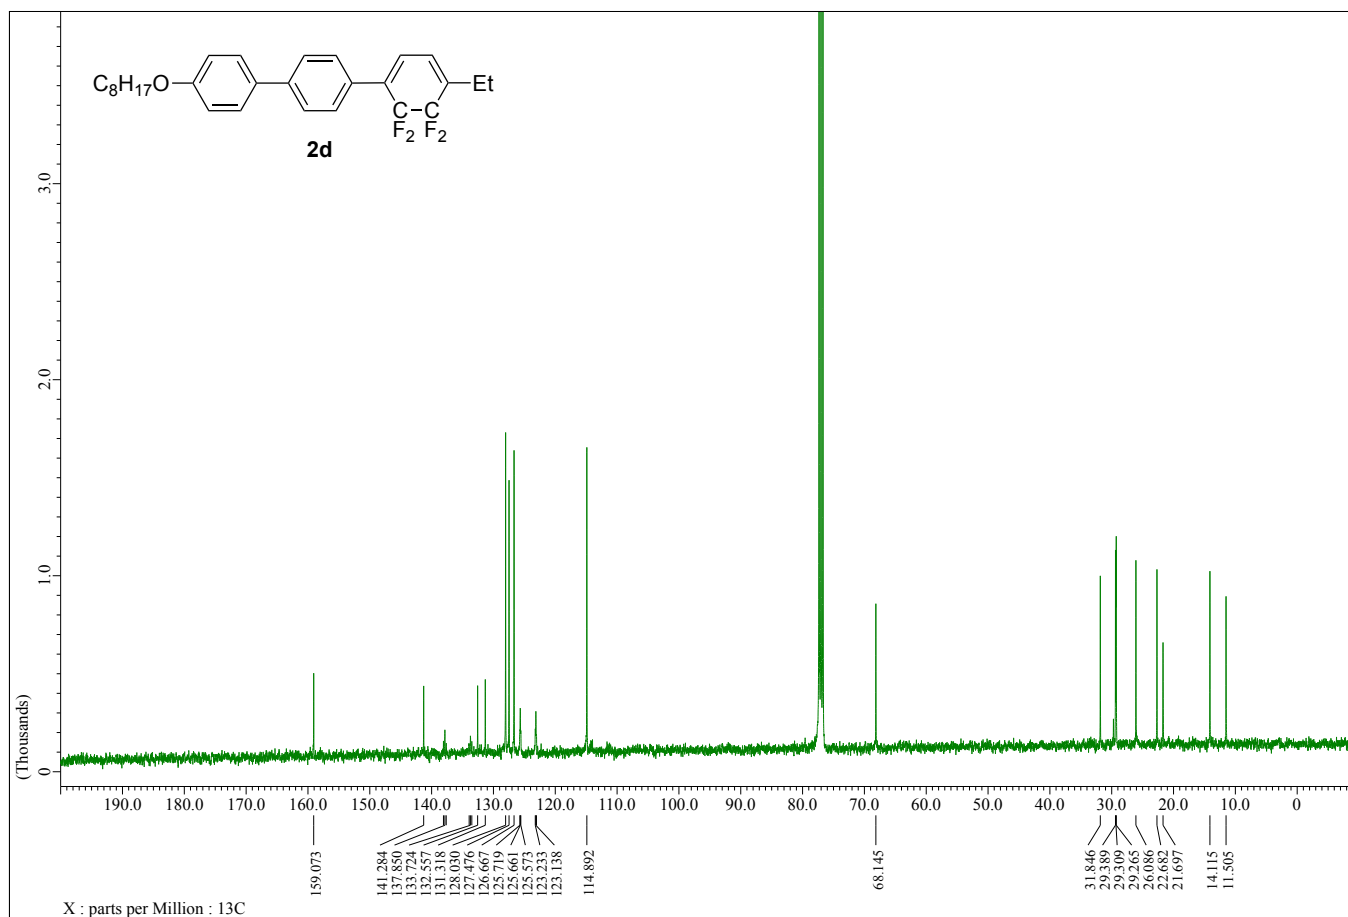

**Figure S14.** <sup>13</sup>C NMR spectrum of **2d** (CDCl<sub>3</sub>, 100 MHz).



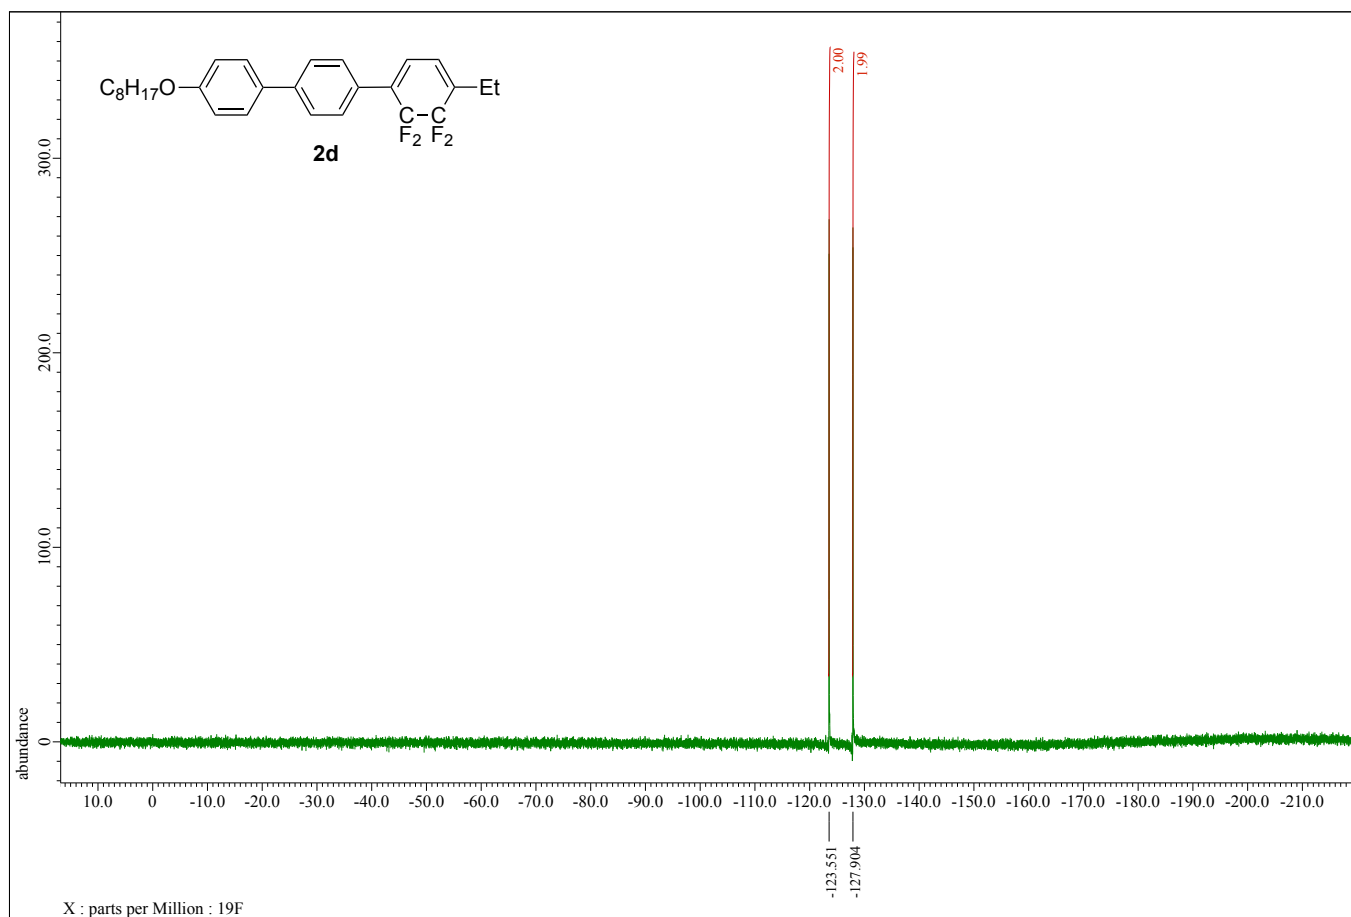

**Figure S15.** <sup>19</sup>F NMR spectrum of **2d** (CDCl<sub>3</sub>, 376 MHz).

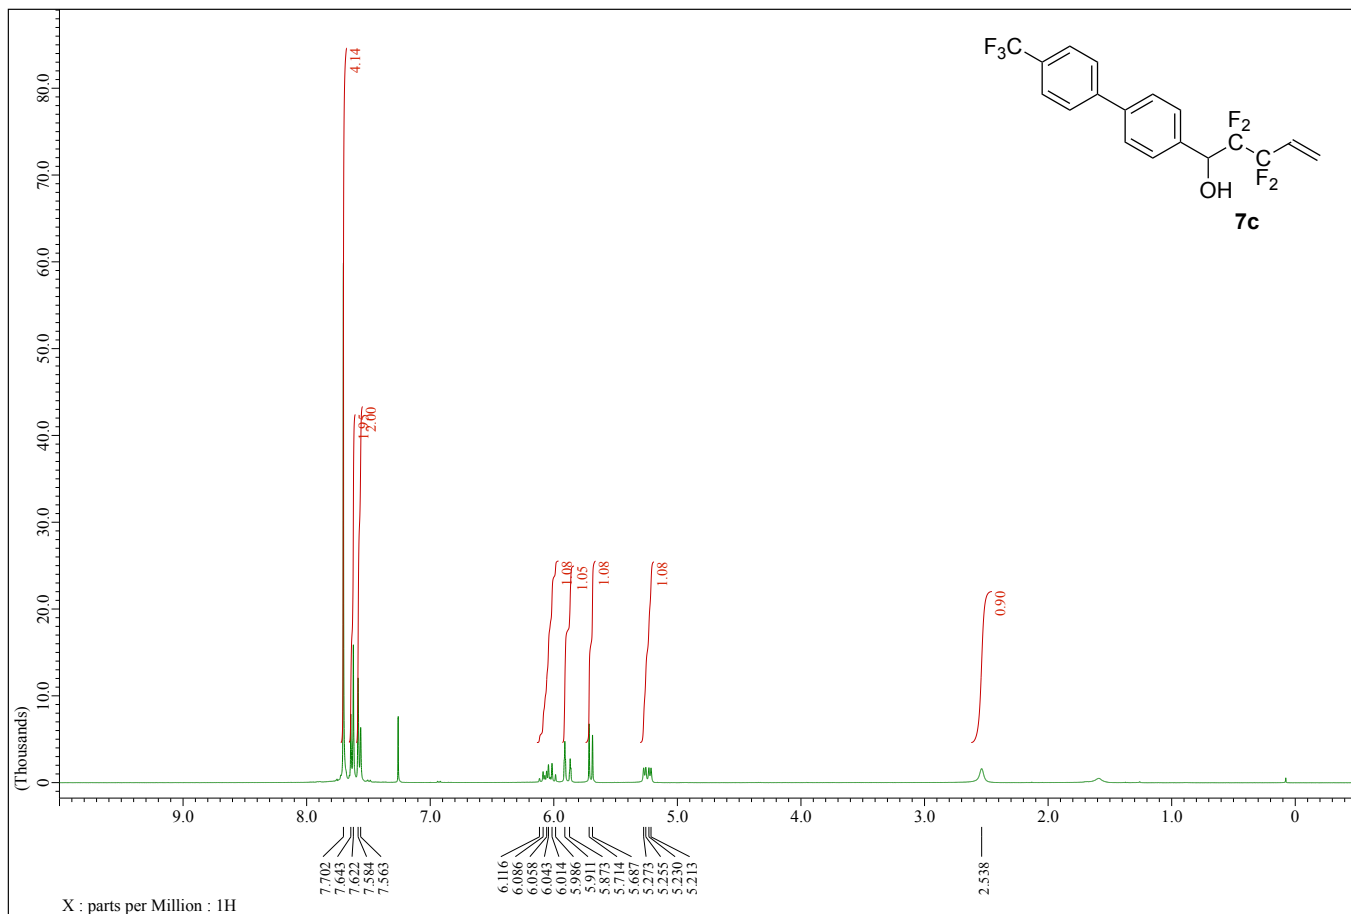

**Figure S16.** <sup>1</sup>H NMR spectrum of **7c** (CDCl<sub>3</sub>, 400 MHz).

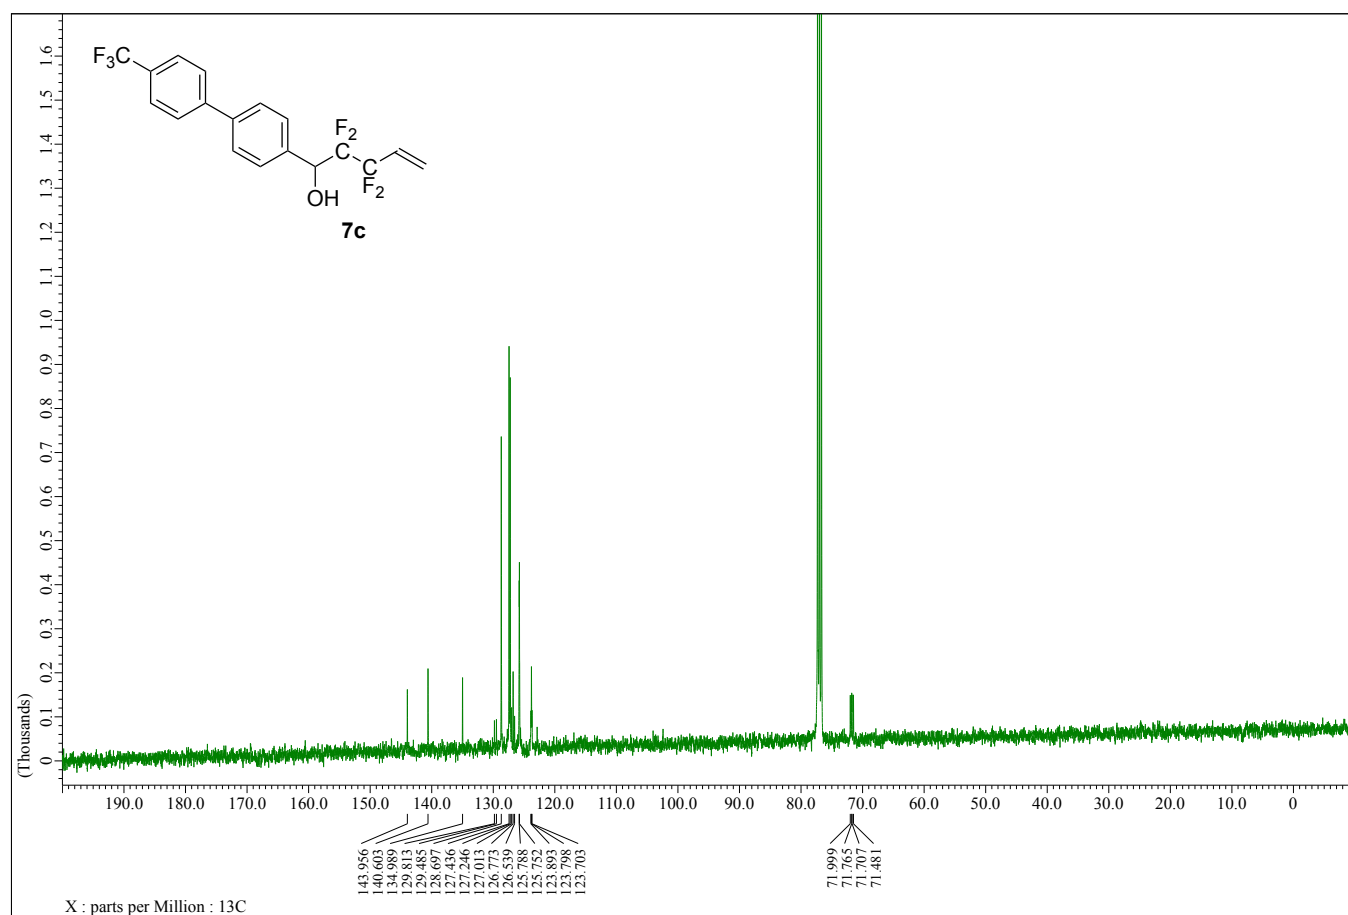

**Figure S17.** <sup>13</sup>C NMR spectrum of **7c** (CDCl<sub>3</sub>, 100 MHz).

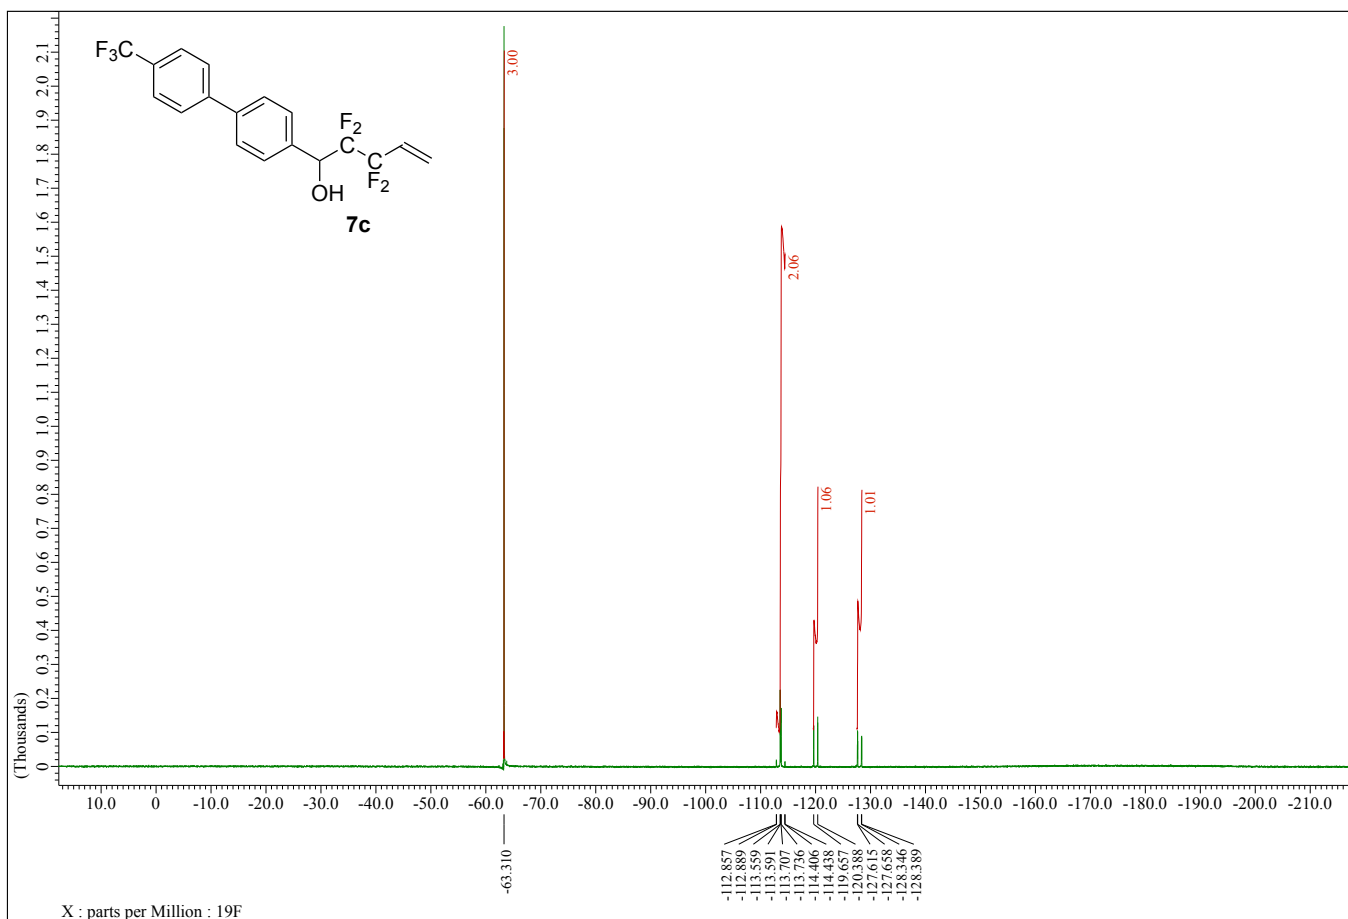

**Figure S18.** <sup>19</sup>F NMR spectrum of **7c** (CDCl<sub>3</sub>, 376 MHz).

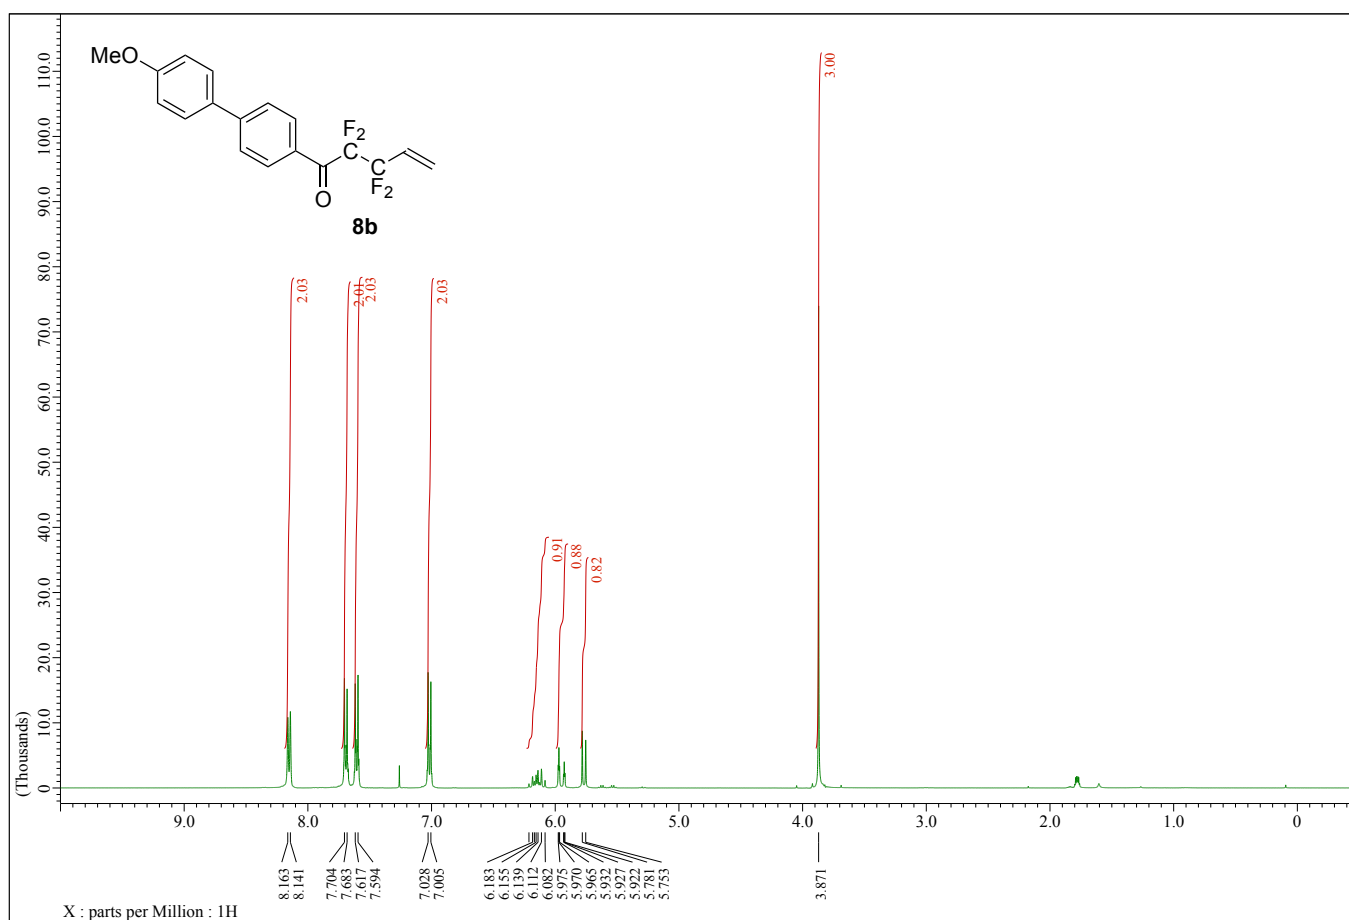

Figure S19. <sup>1</sup>H NMR spectrum of **8b** (CDCl<sub>3</sub>, 400 MHz).

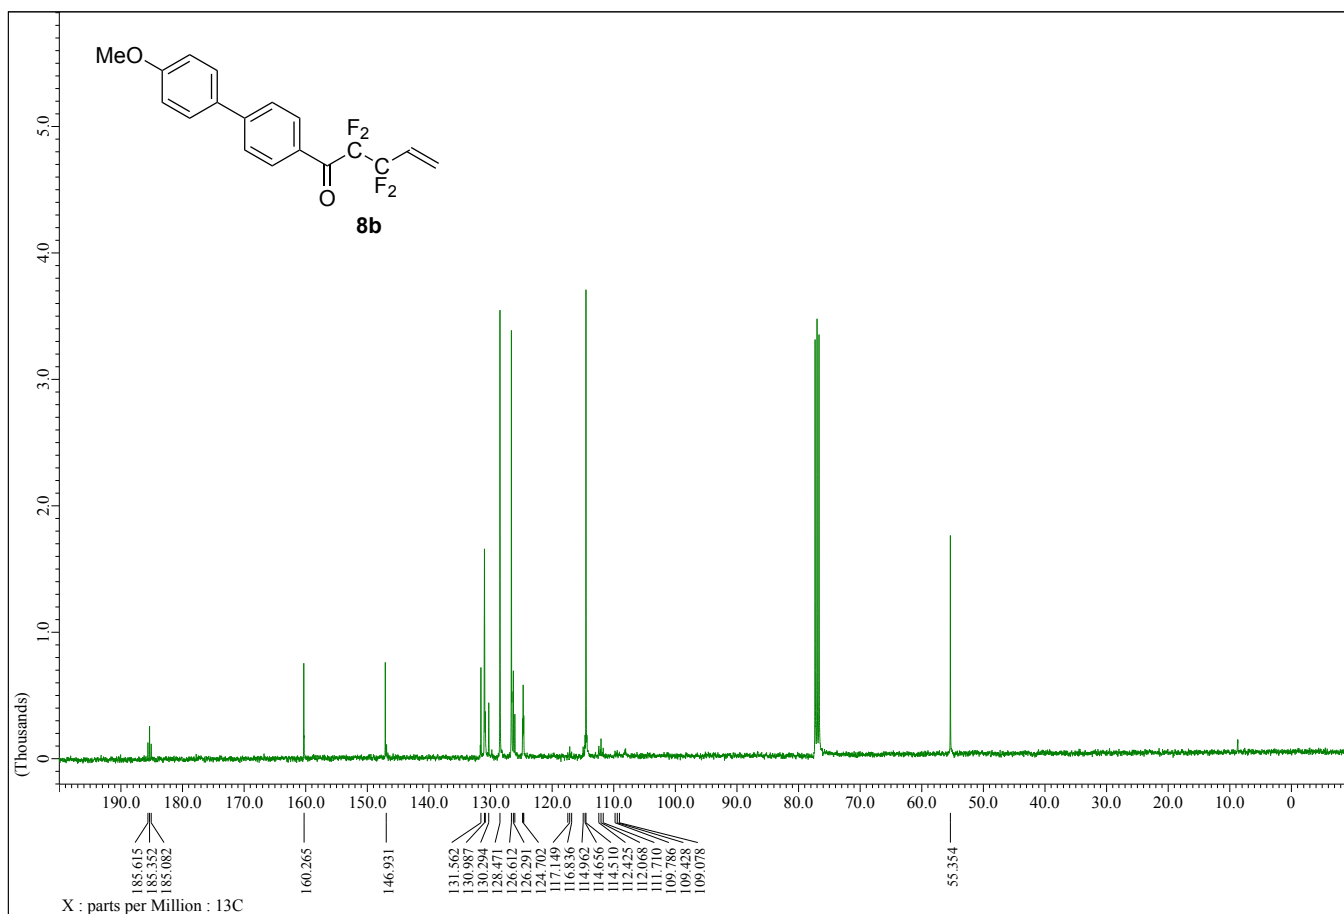

Figure S20. <sup>13</sup>C NMR spectrum of **8b** (CDCl<sub>3</sub>, 100 MHz).

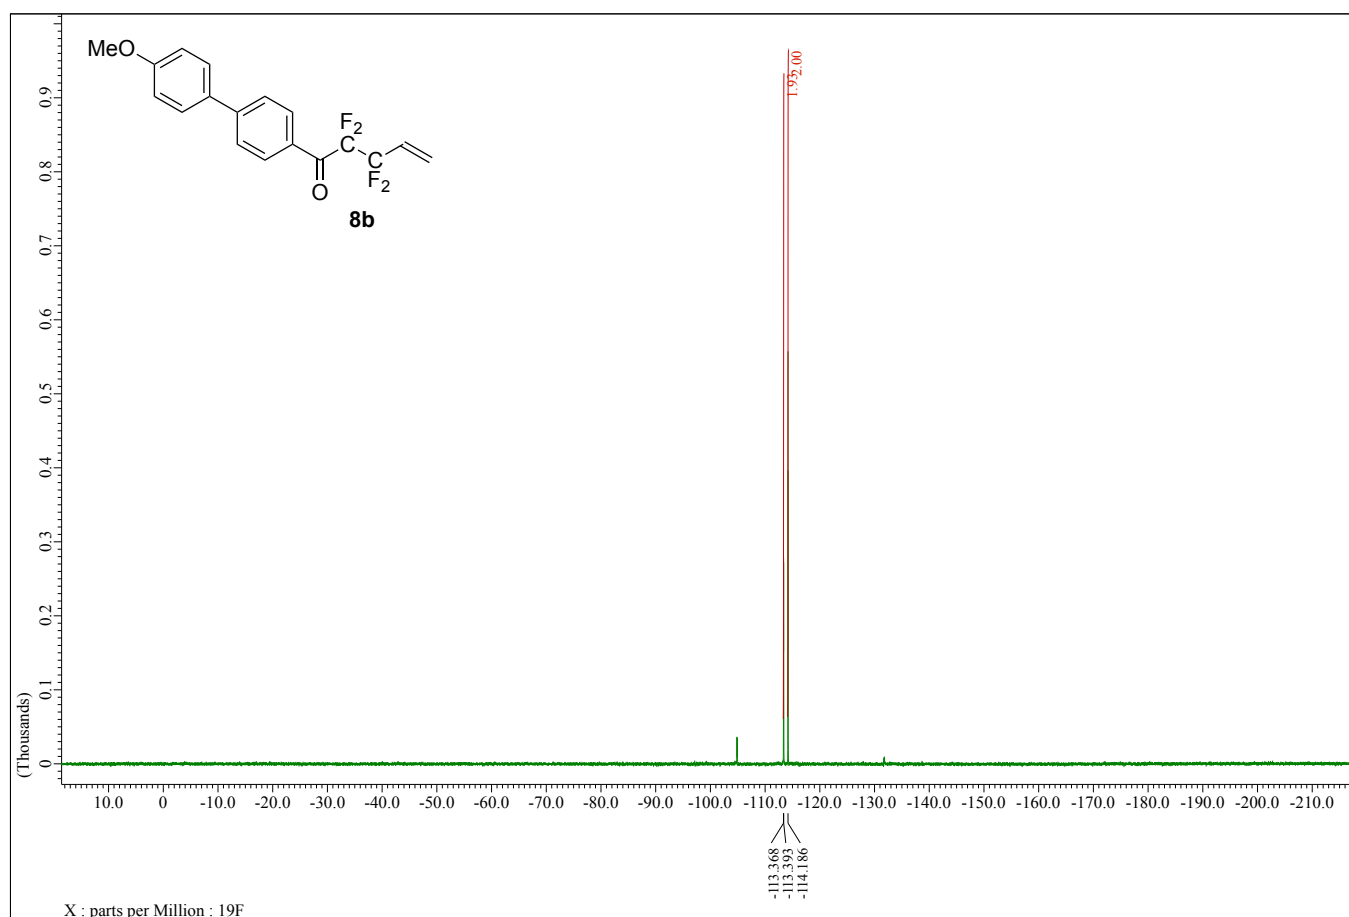

Figure S21. <sup>19</sup>F NMR spectrum of **8b** (CDCl<sub>3</sub>, 376 MHz).

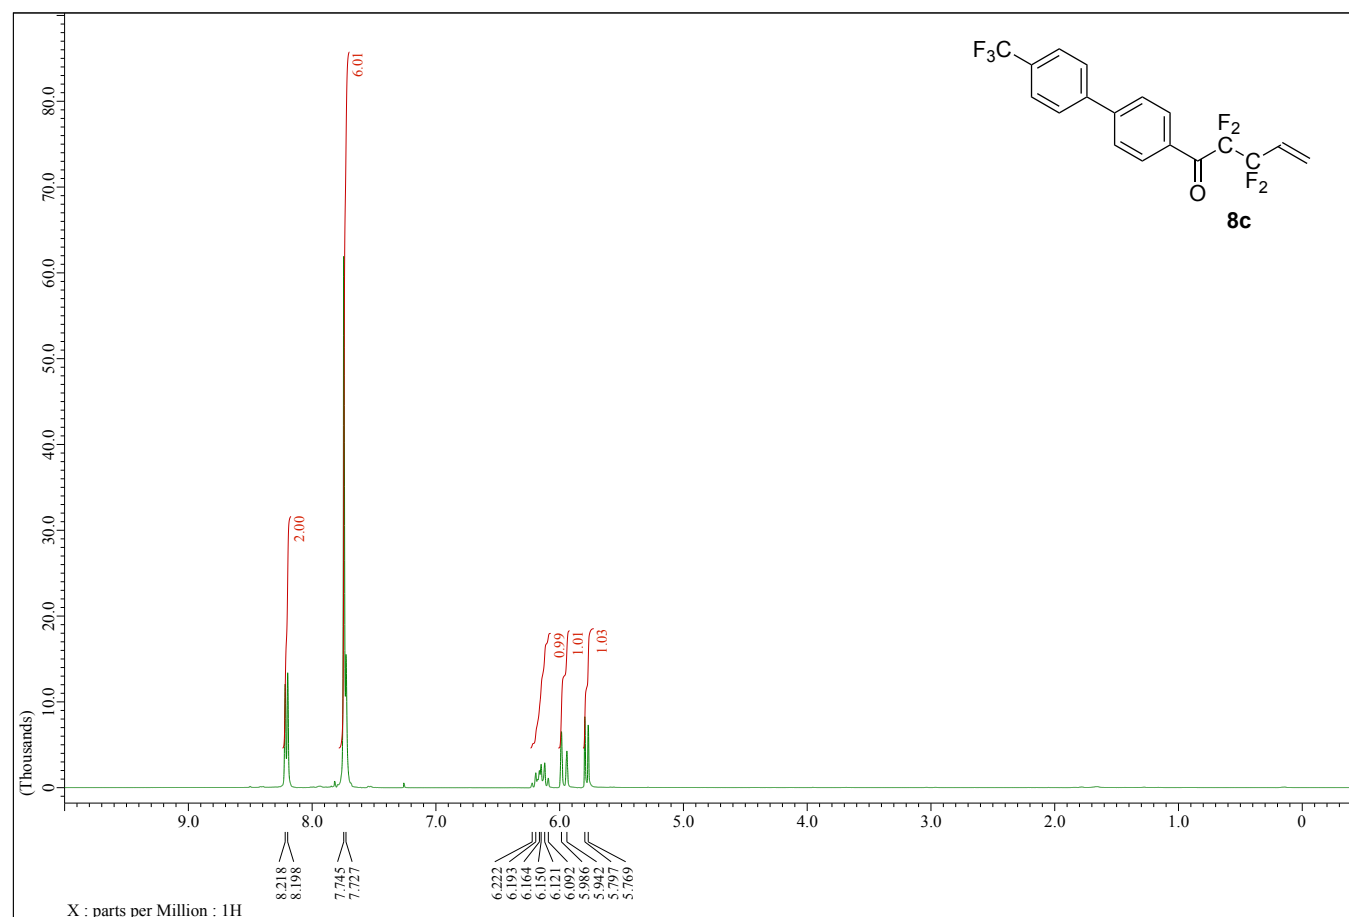

Figure S22. <sup>1</sup>H NMR spectrum of **8c** (CDCl<sub>3</sub>, 400 MHz).

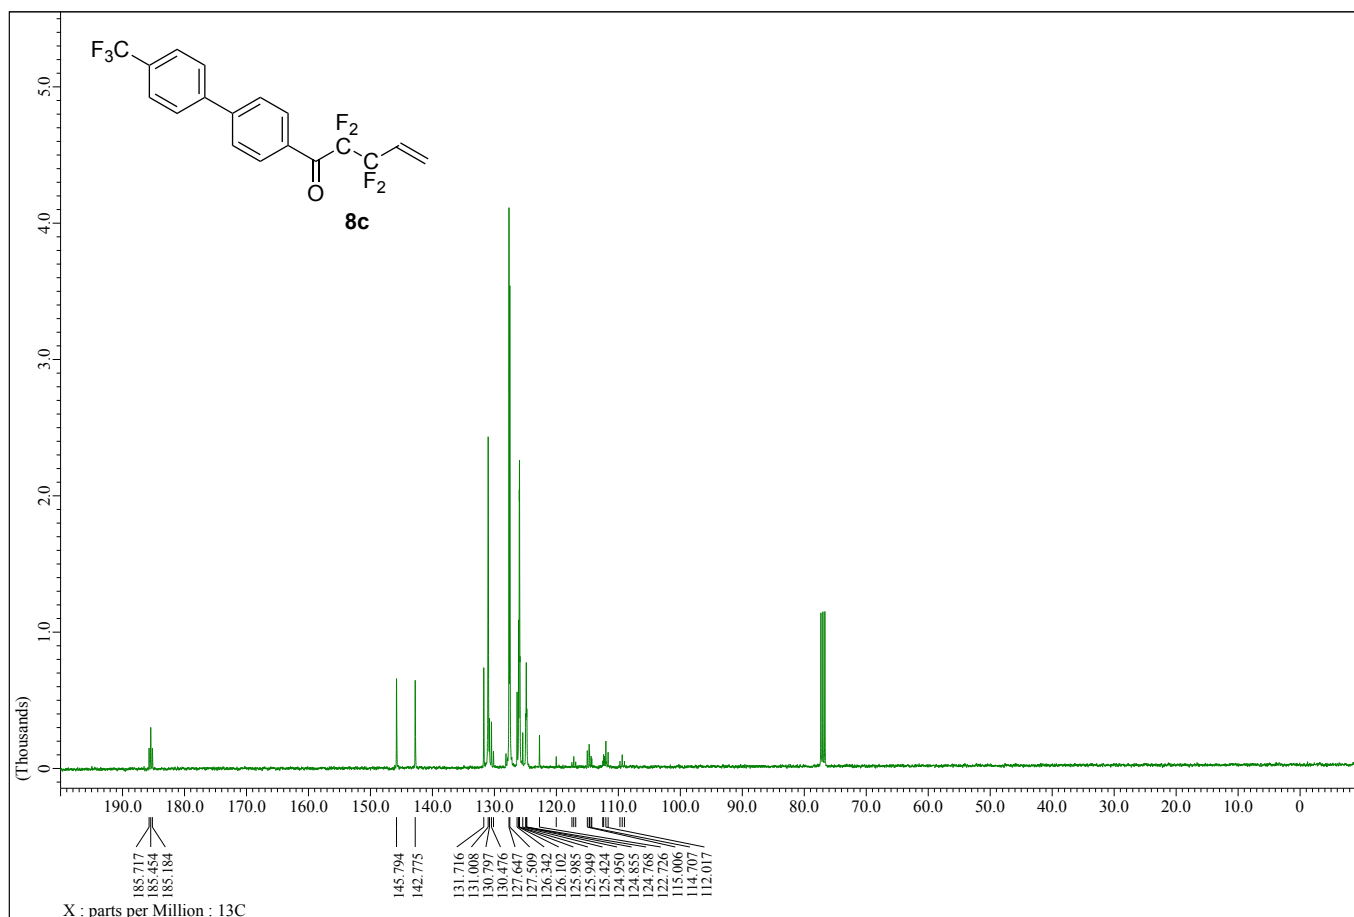

**Figure S23.** <sup>13</sup>C NMR spectrum of **8c** (CDCl<sub>3</sub>, 100 MHz).

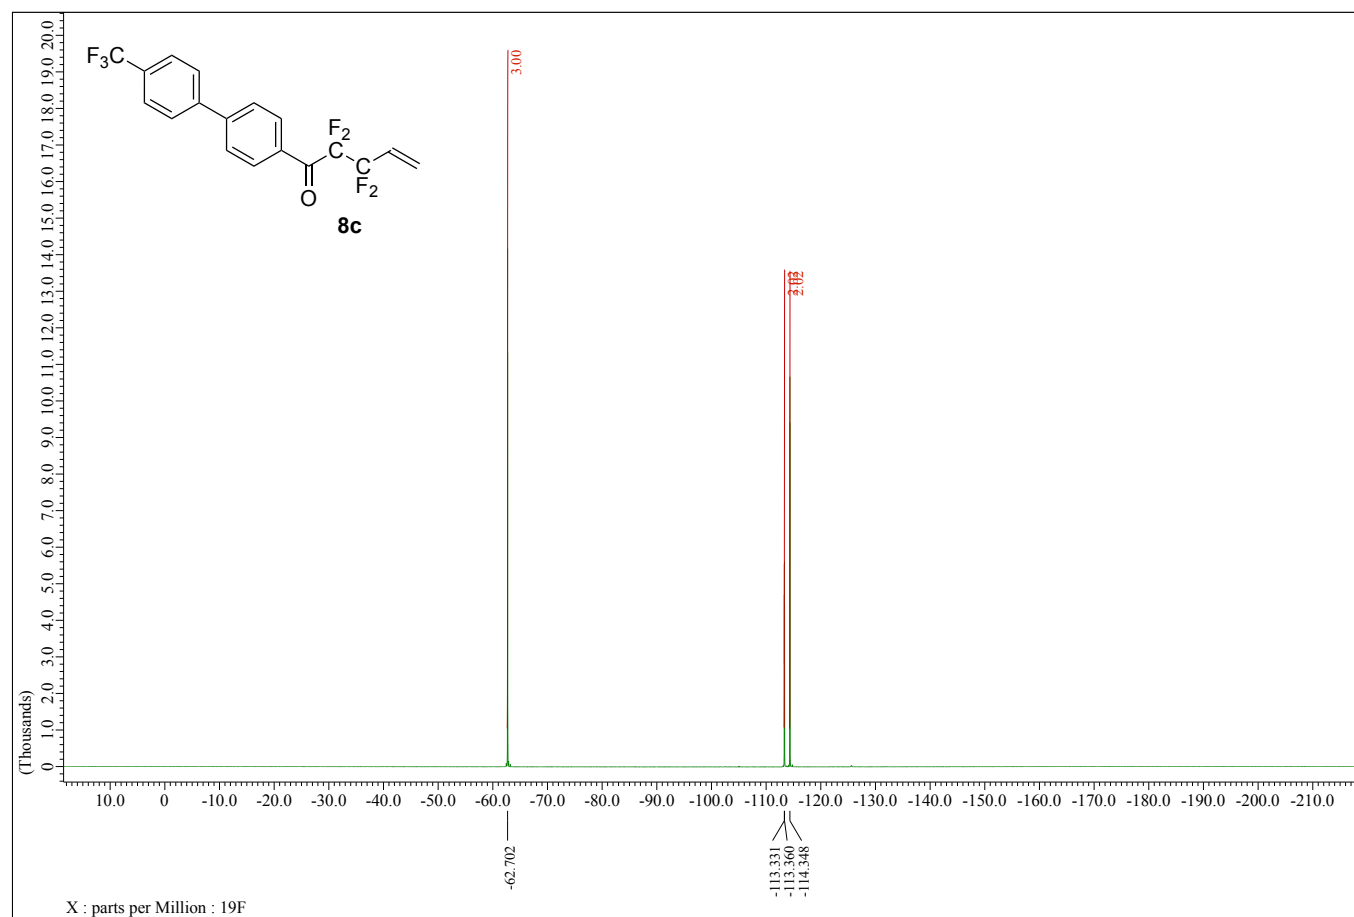

**Figure S24.** <sup>19</sup>F NMR spectrum of **8c** (CDCl<sub>3</sub>, 376 MHz).

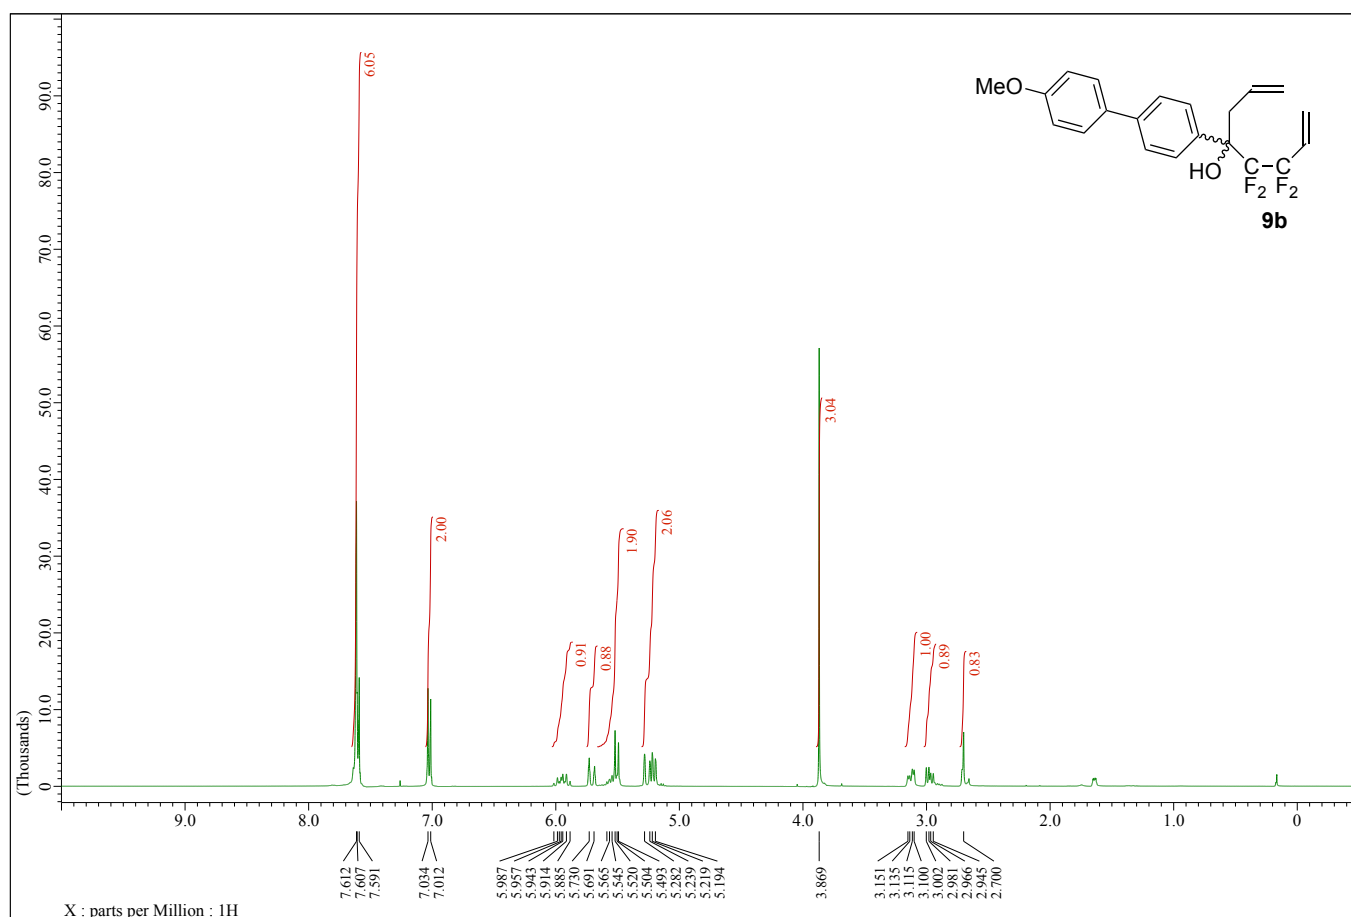

**Figure S25.** <sup>1</sup>H NMR spectrum of **9b** (CDCl<sub>3</sub>, 400 MHz).

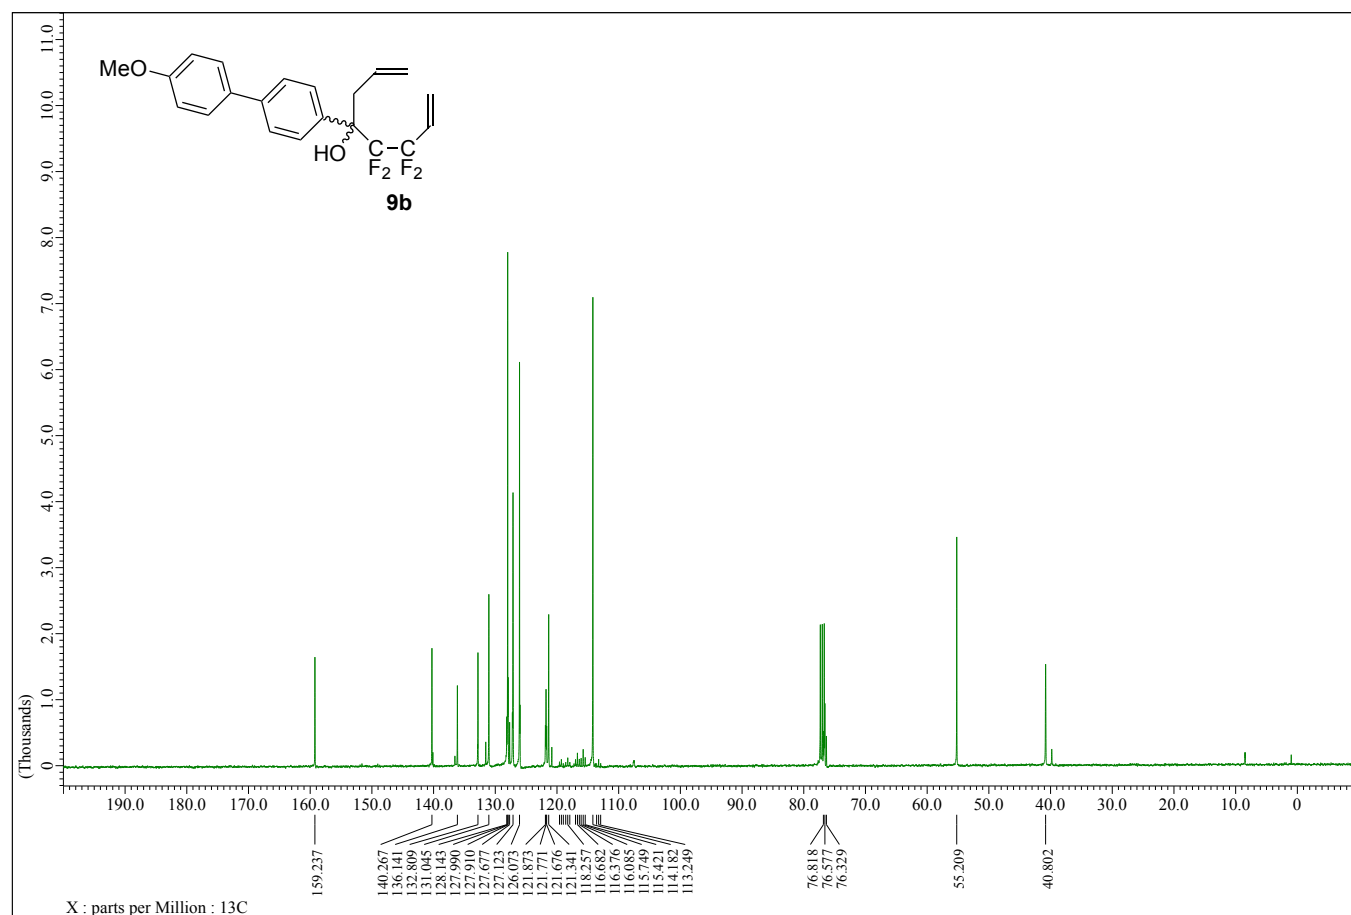

**Figure S26.** <sup>13</sup>C NMR spectrum of **9b** (CDCl<sub>3</sub>, 100 MHz).

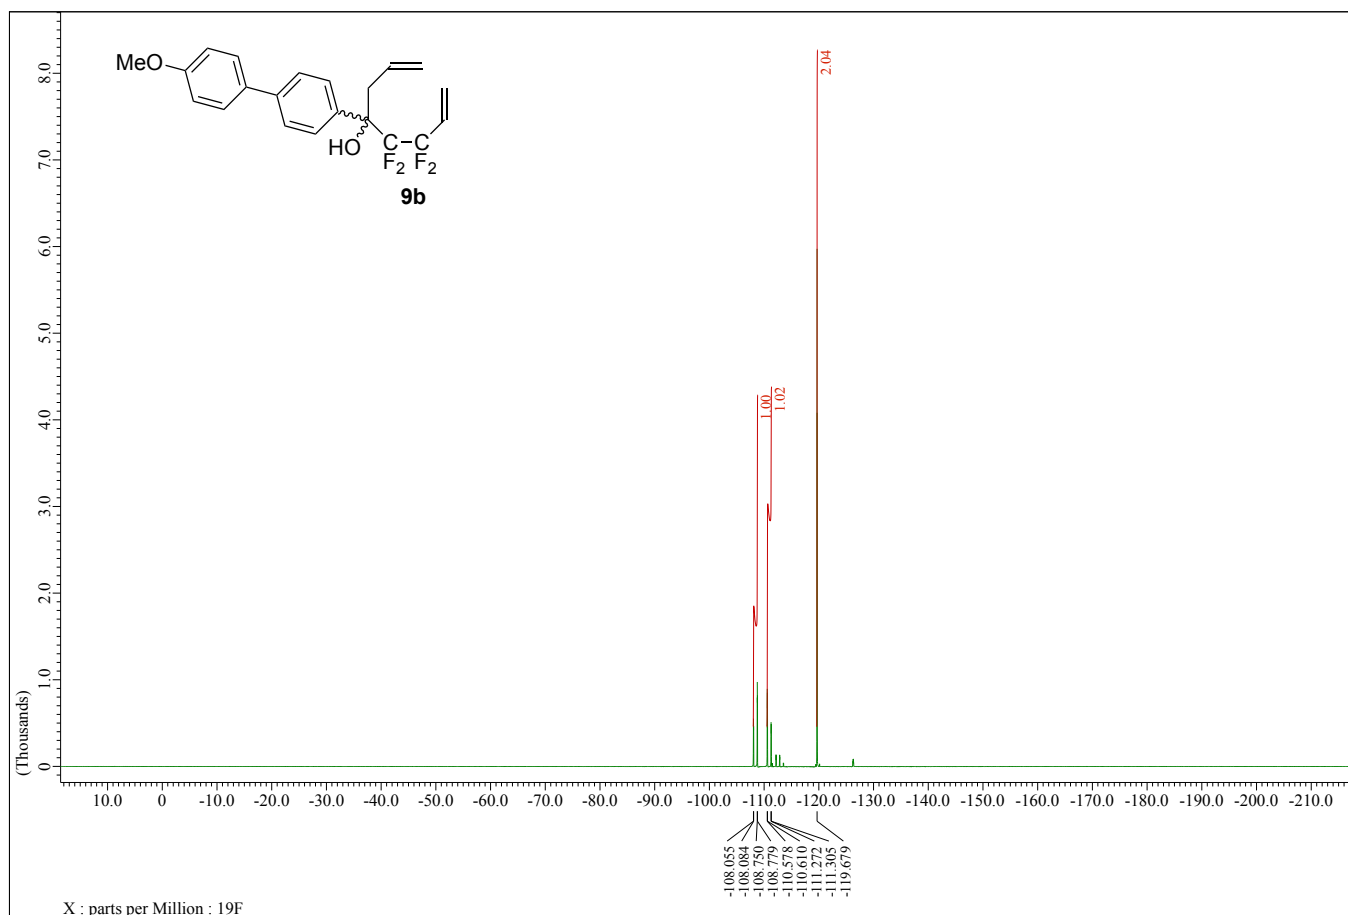

**Figure S27.** <sup>19</sup>F NMR spectrum of **9b** (CDCl<sub>3</sub>, 376 MHz).

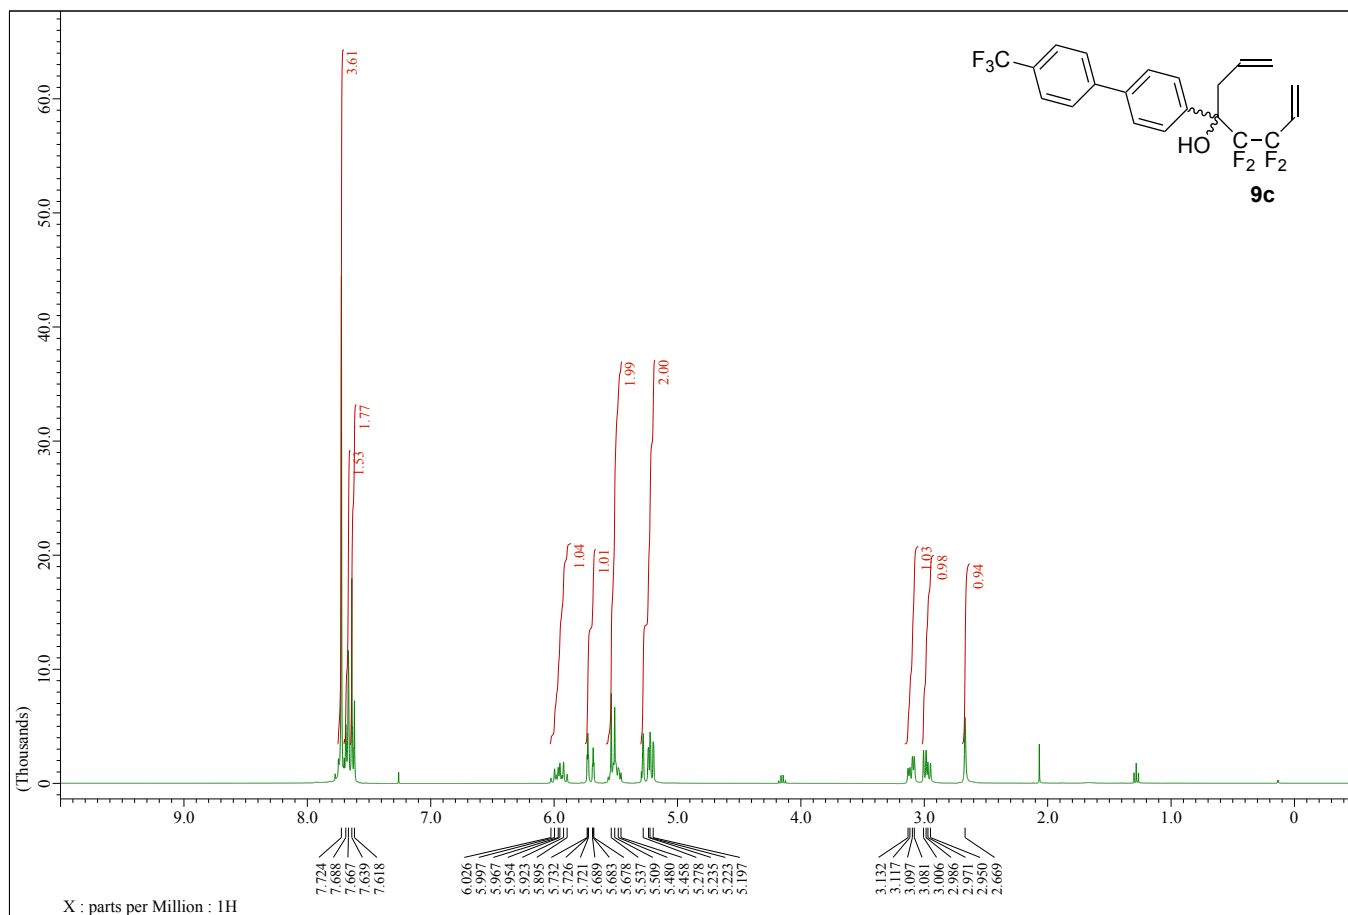

**Figure S28.** <sup>1</sup>H NMR spectrum of **9c** (CDCl<sub>3</sub>, 400 MHz).

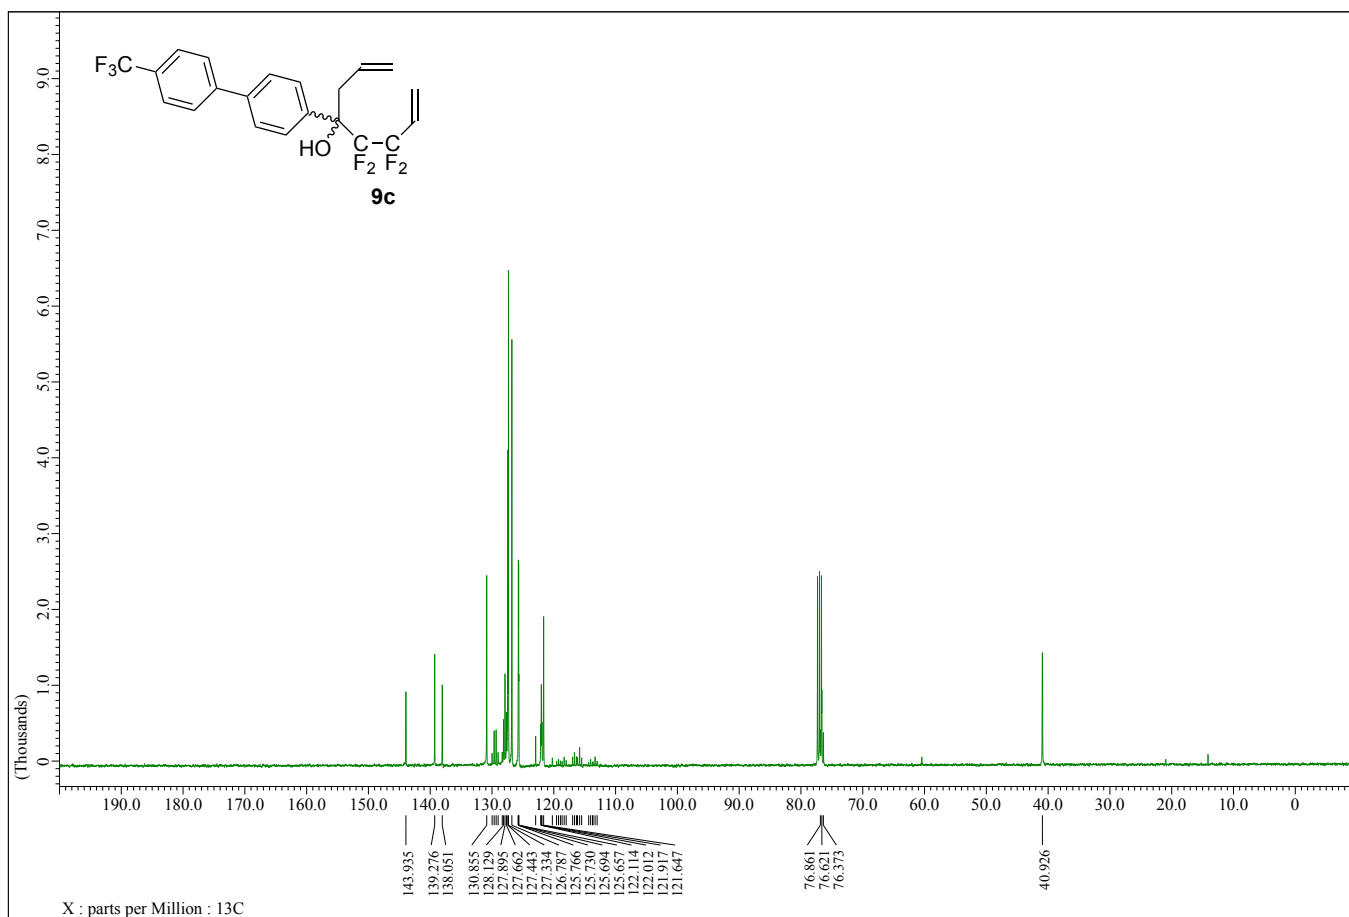

**Figure S29.** <sup>13</sup>C NMR spectrum of **9c** (CDCl<sub>3</sub>, 100 MHz).

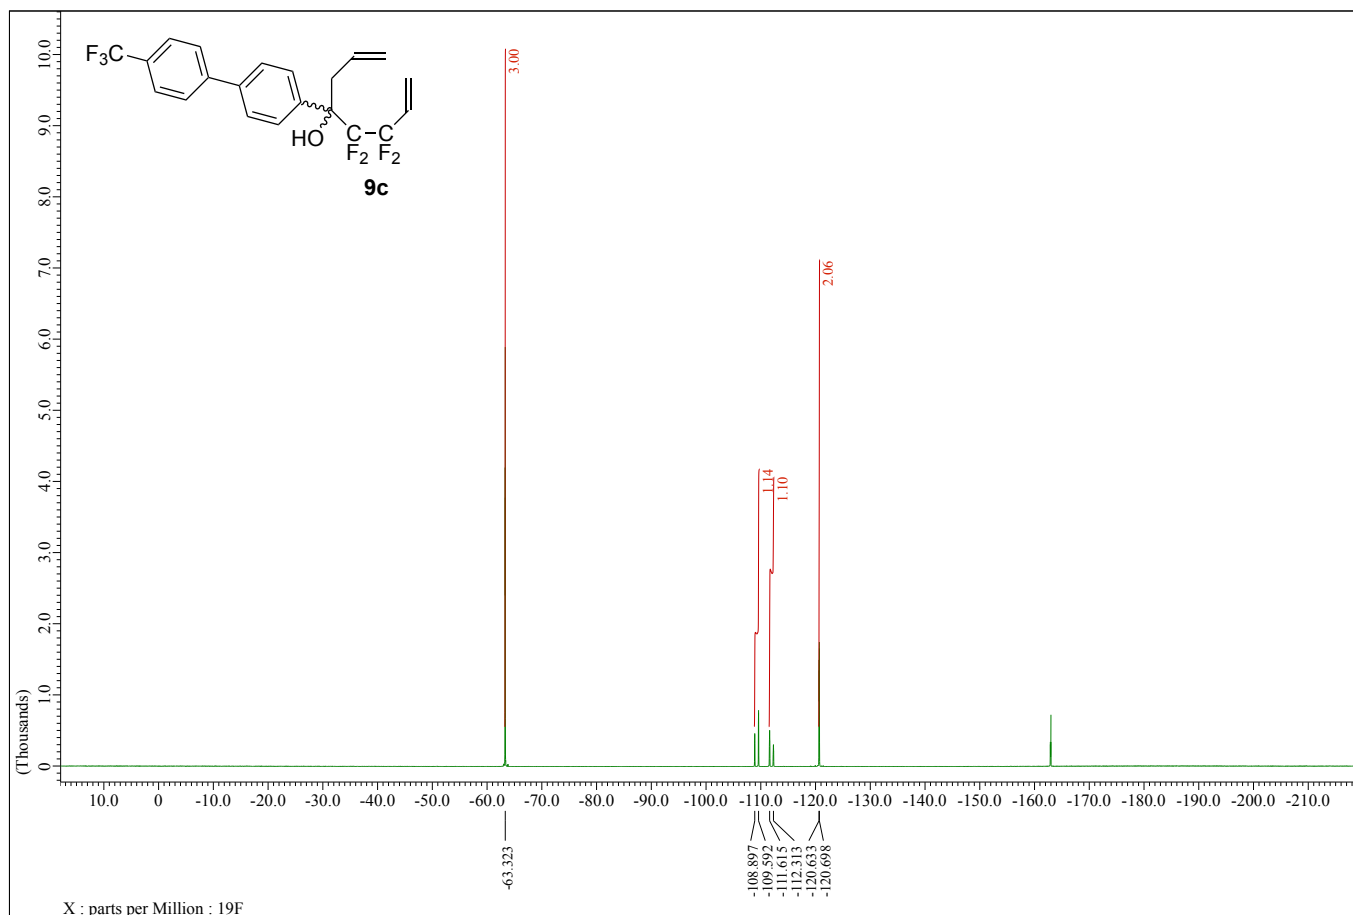

**Figure S30.** <sup>19</sup>F NMR spectrum of **9c** (CDCl<sub>3</sub>, 376 MHz).



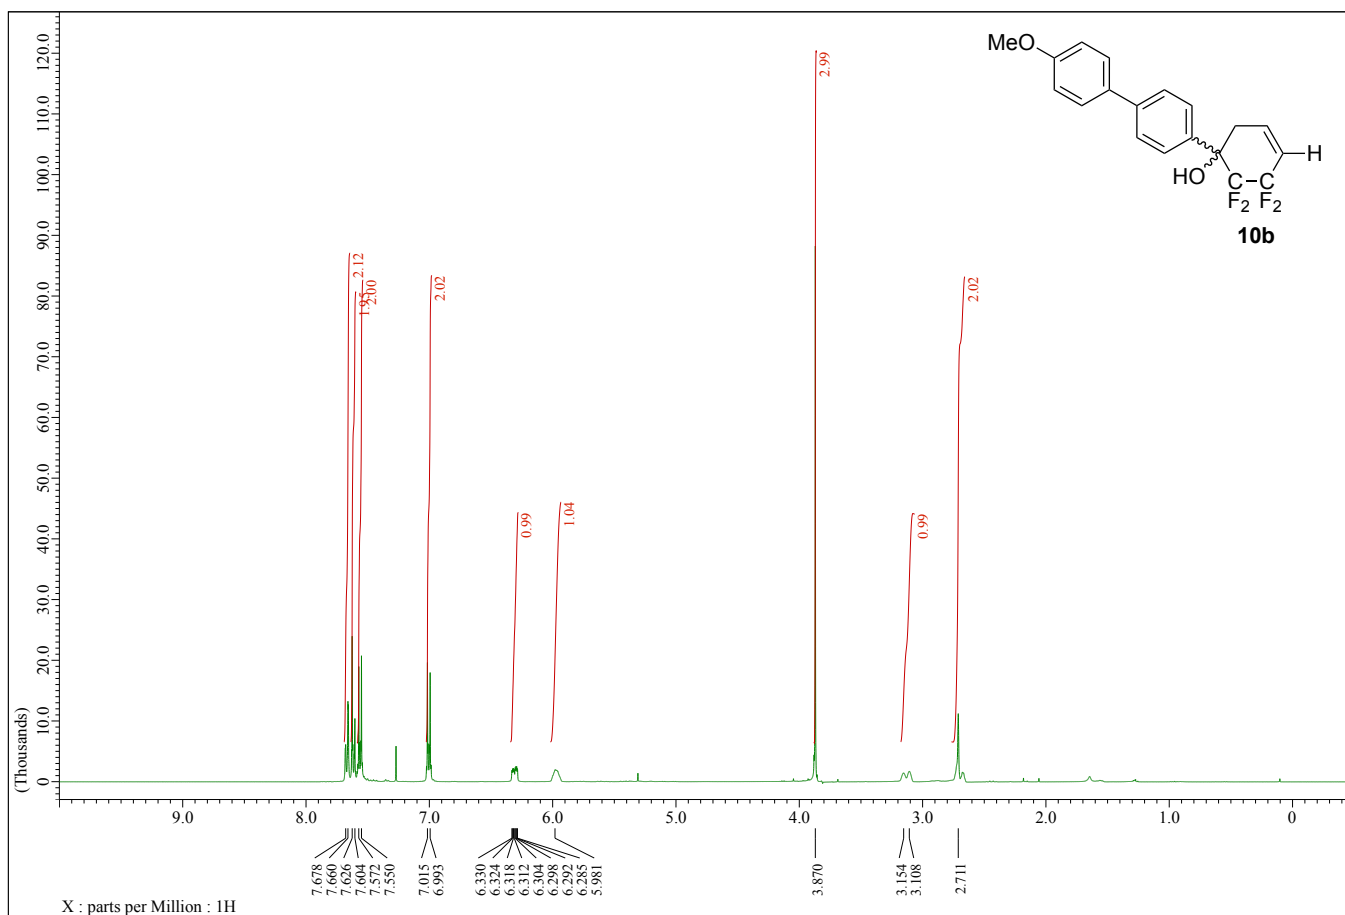

**Figure S31.** <sup>1</sup>H NMR spectrum of **10b** (CDCl<sub>3</sub>, 400 MHz).

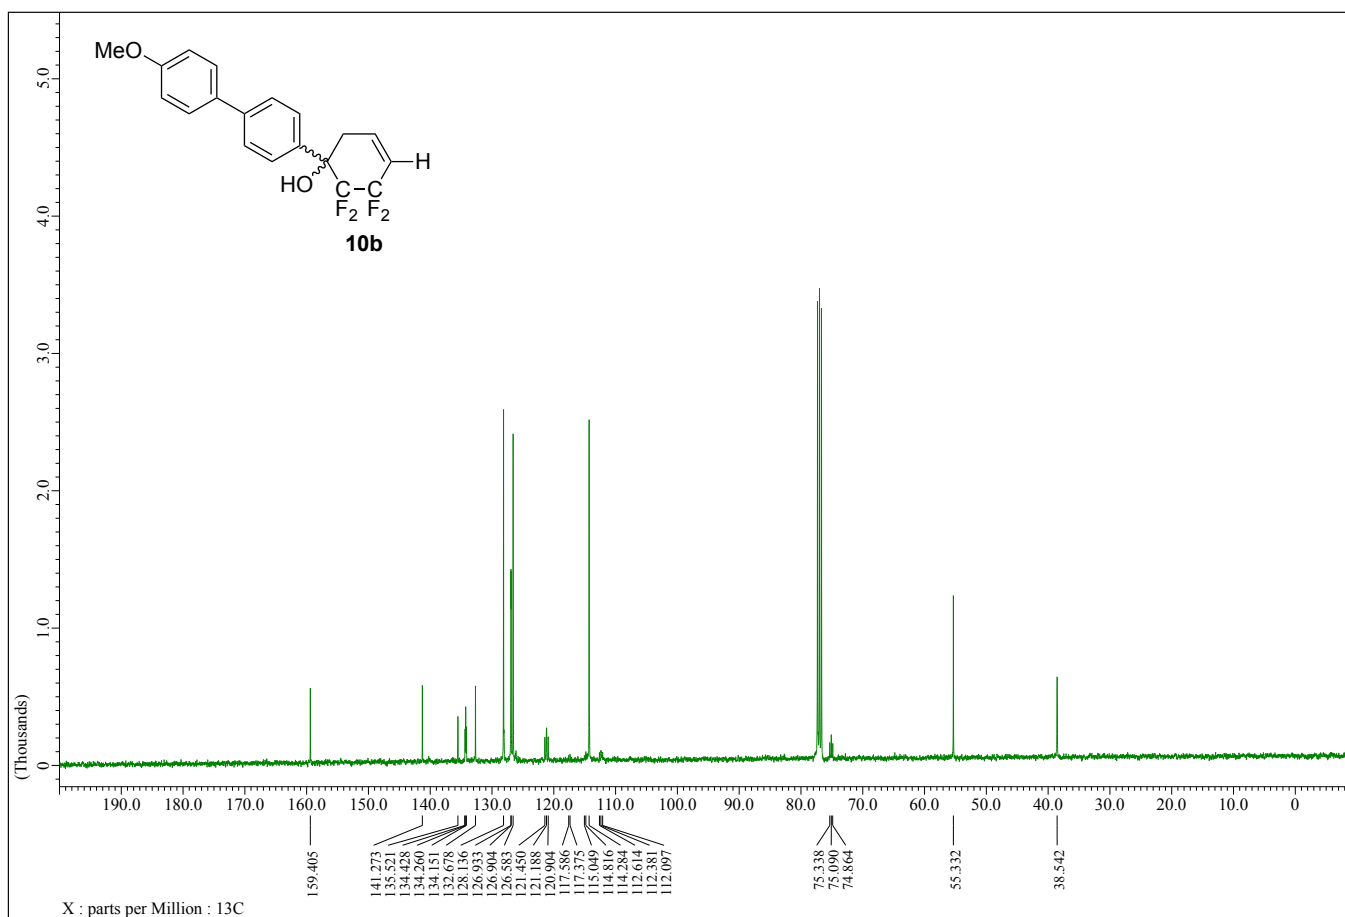

**Figure S32.** <sup>13</sup>C NMR spectrum of **10b** (CDCl<sub>3</sub>, 100 MHz).

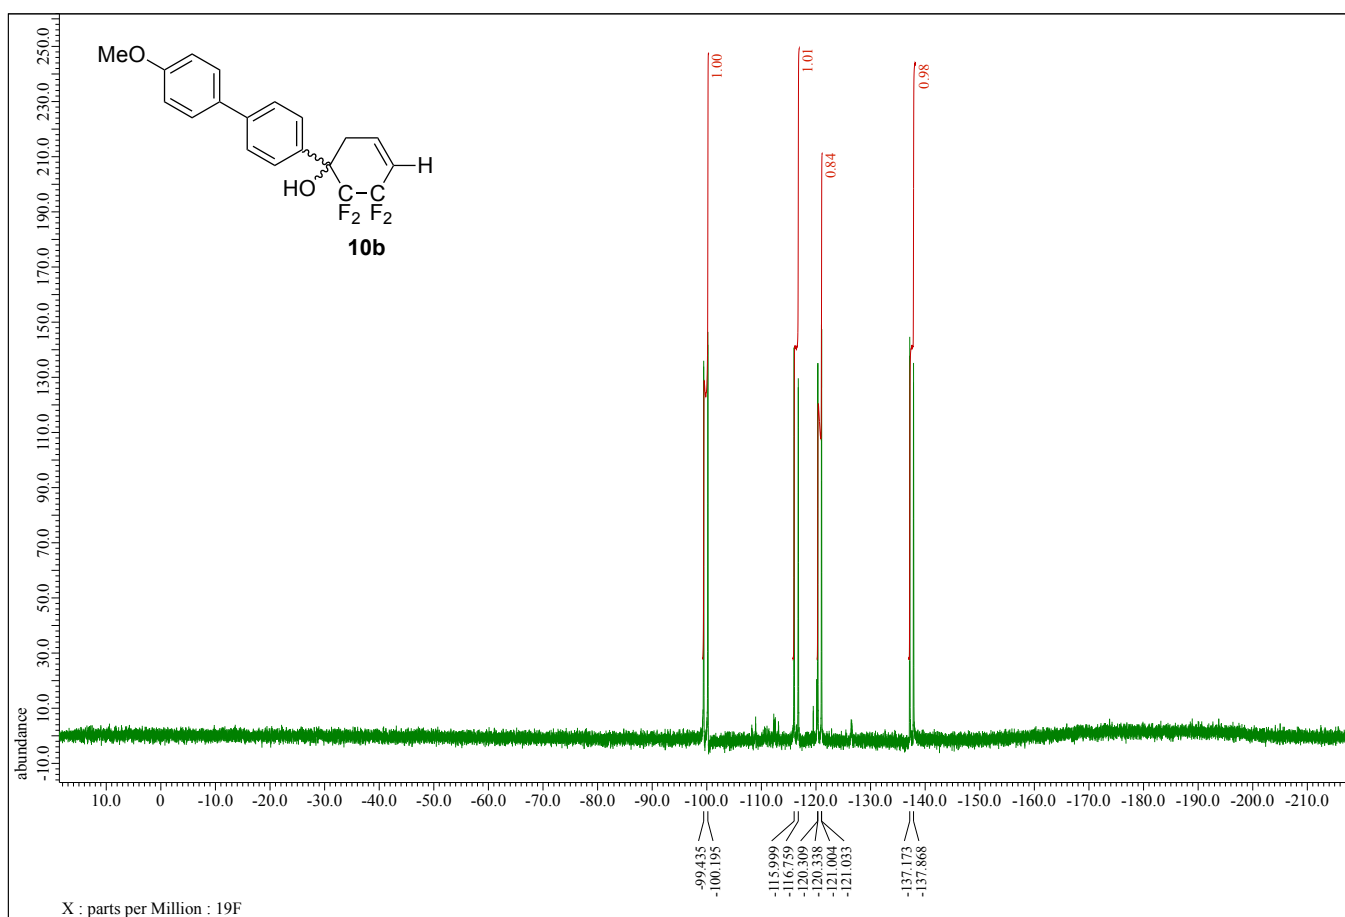

Figure S33. <sup>19</sup>F NMR spectrum of **10b** (CDCl<sub>3</sub>, 376 MHz).

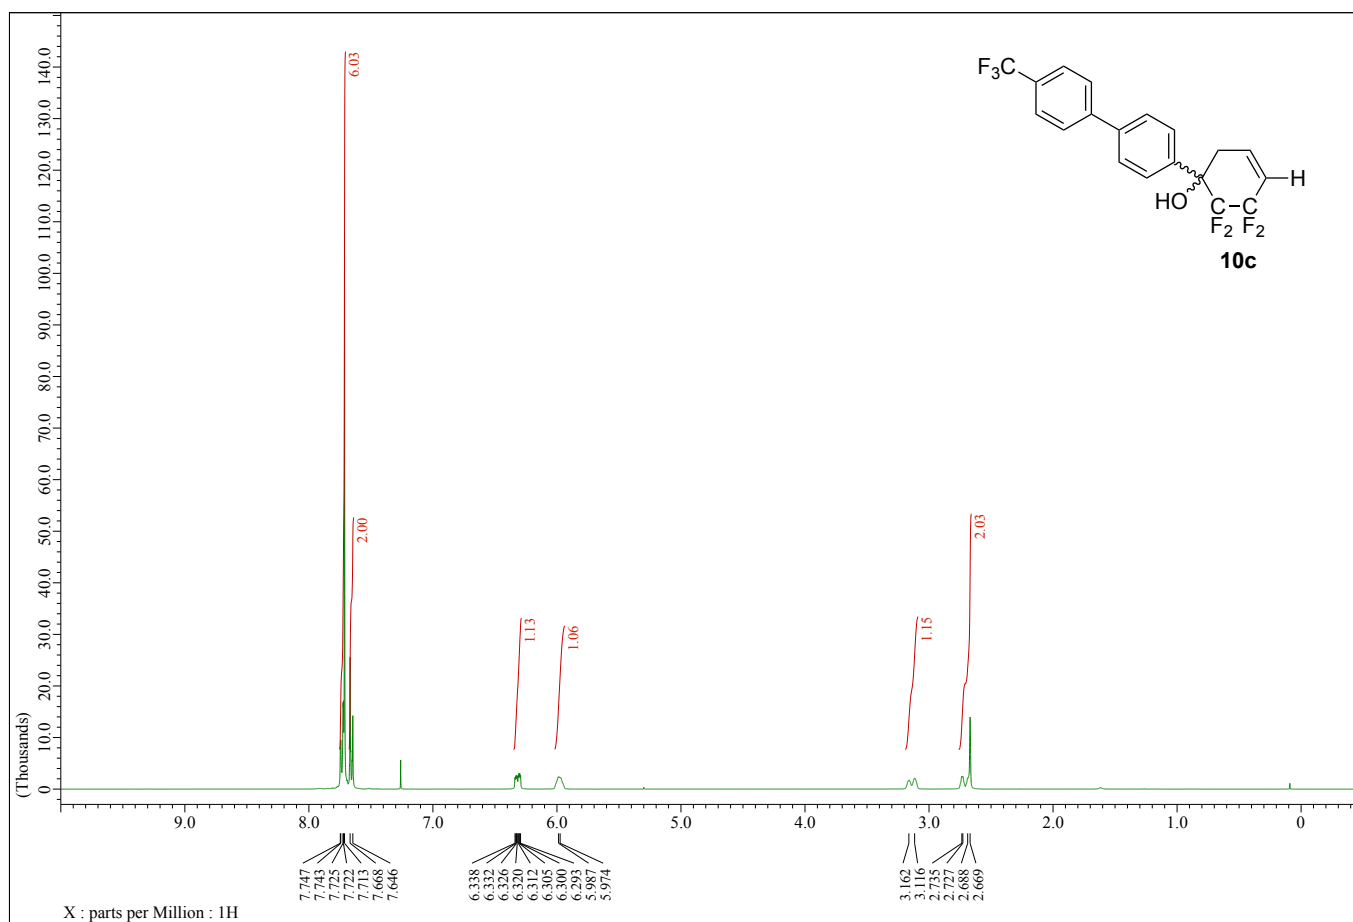

Figure S34. <sup>1</sup>H NMR spectrum of **10c** (CDCl<sub>3</sub>, 400 MHz).

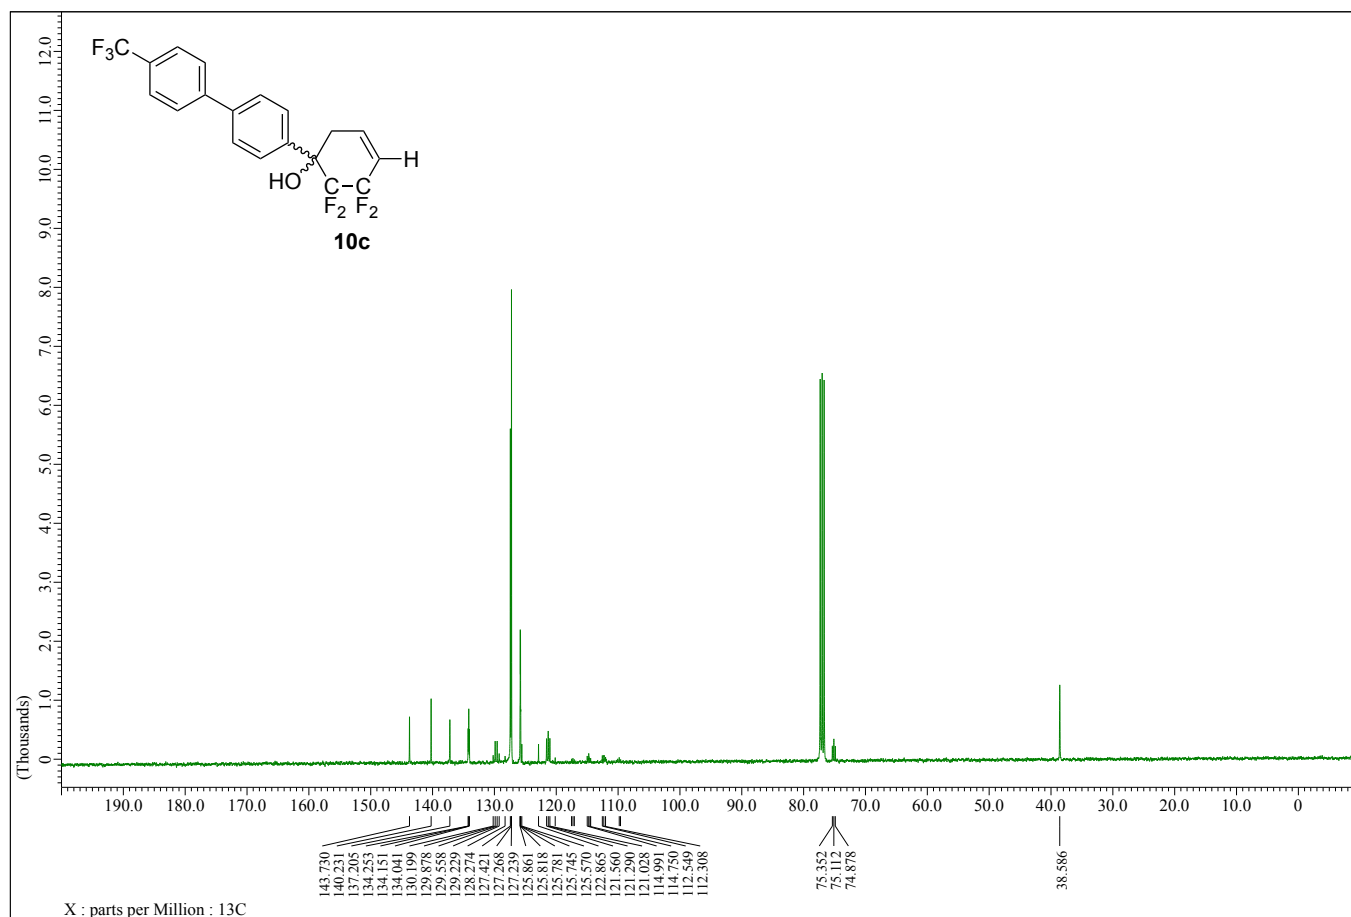

**Figure S35.** <sup>13</sup>C NMR spectrum of **10c** (CDCl<sub>3</sub>, 100 MHz).

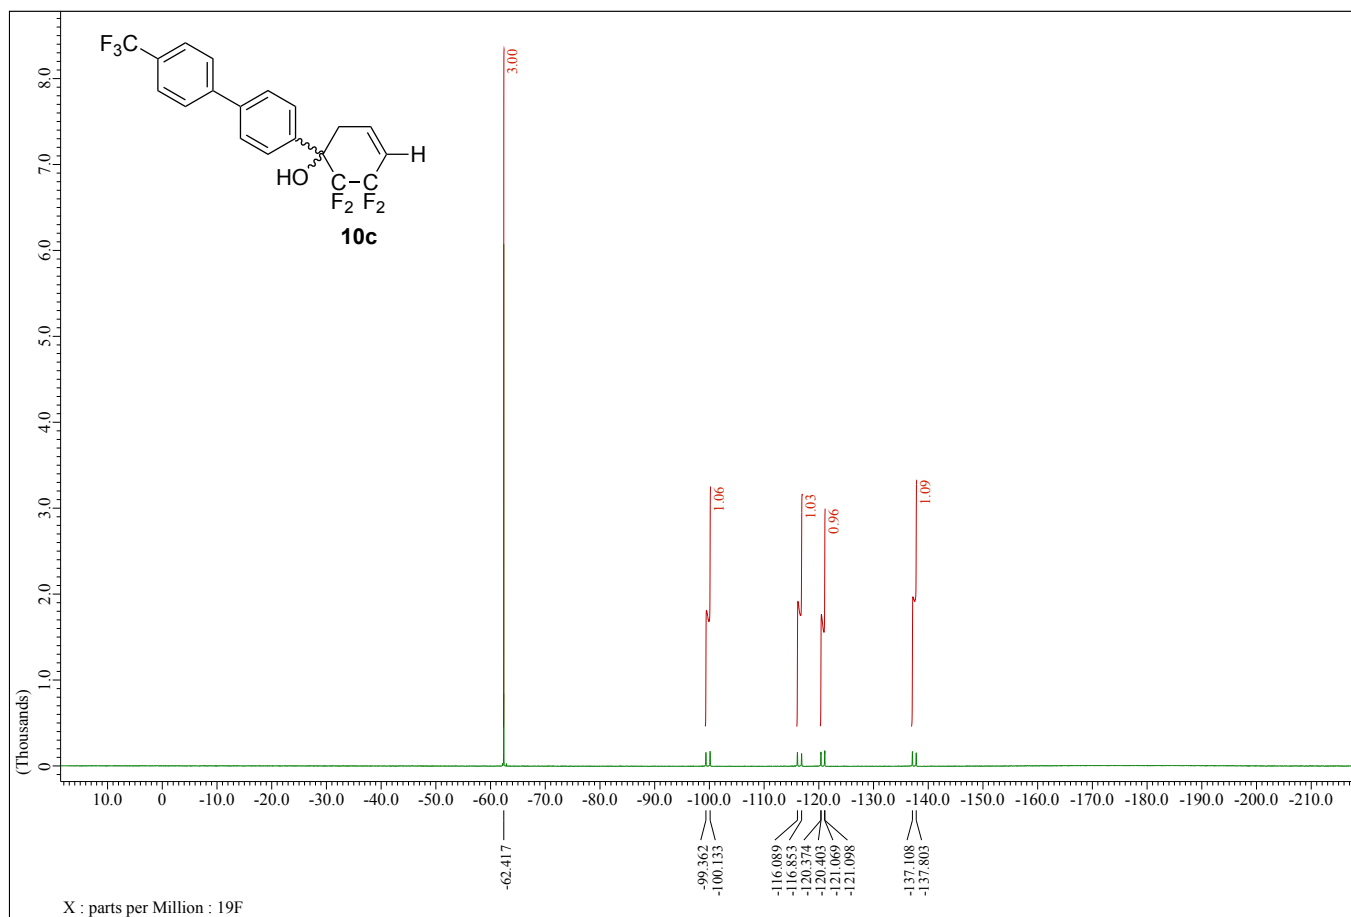

**Figure S36.** <sup>19</sup>F NMR spectrum of **10c** (CDCl<sub>3</sub>, 376 MHz).

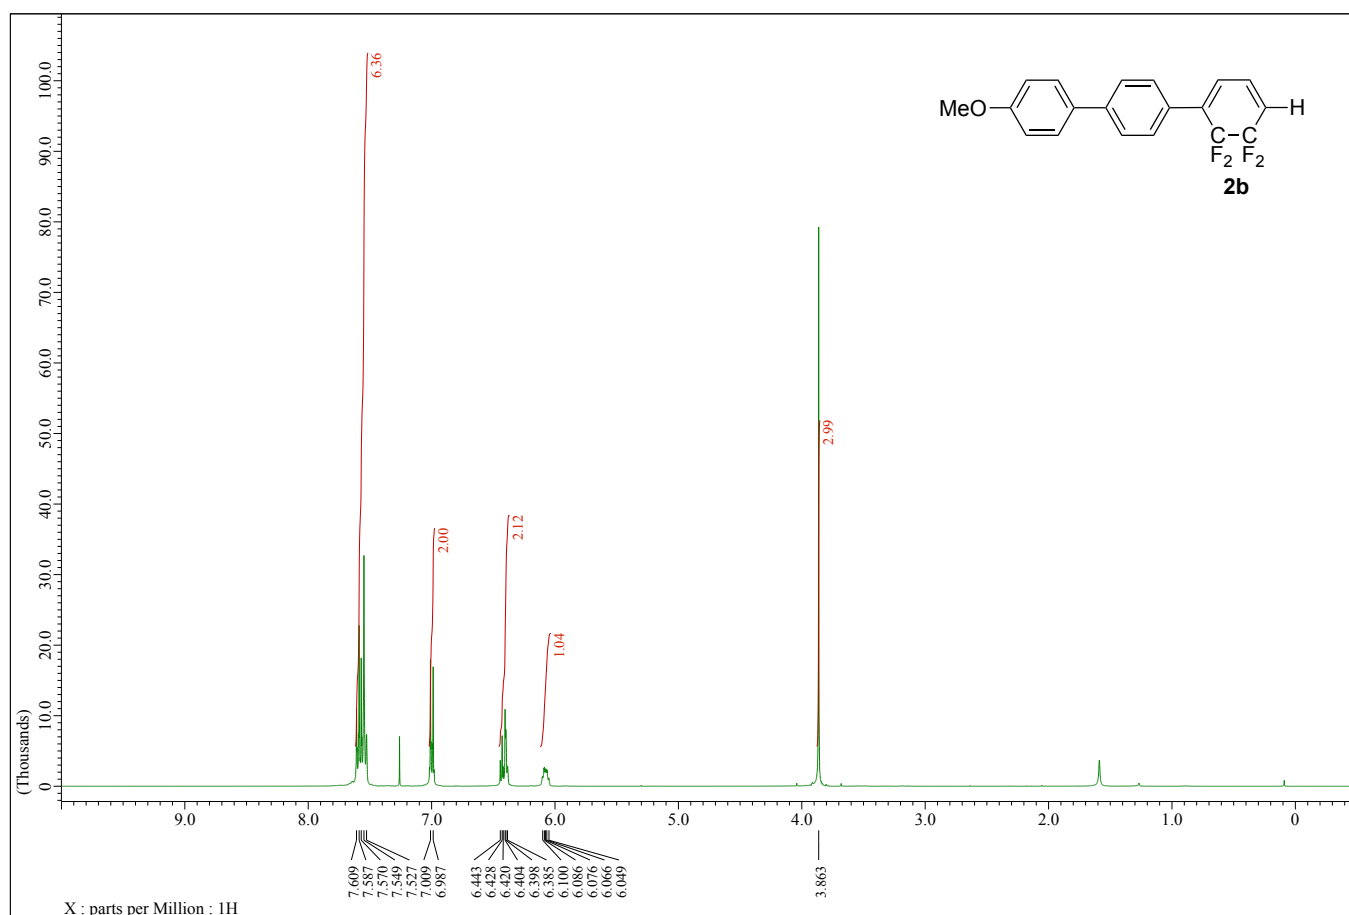

**Figure S37.** <sup>1</sup>H NMR spectrum of **2b** (CDCl<sub>3</sub>, 400 MHz).

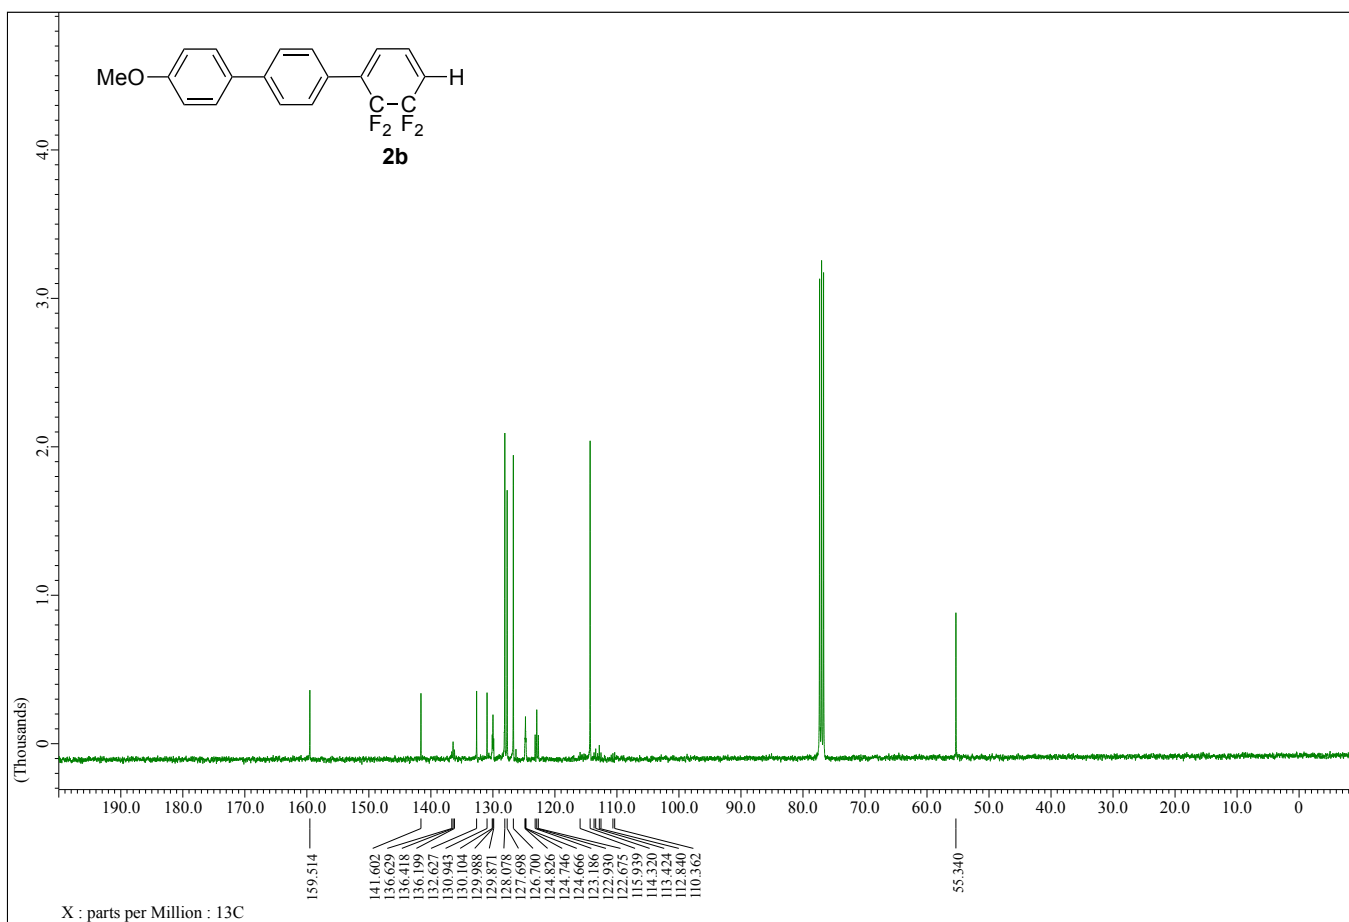

**Figure S38.** <sup>13</sup>C NMR spectrum of **2b** (CDCl<sub>3</sub>, 100 MHz).

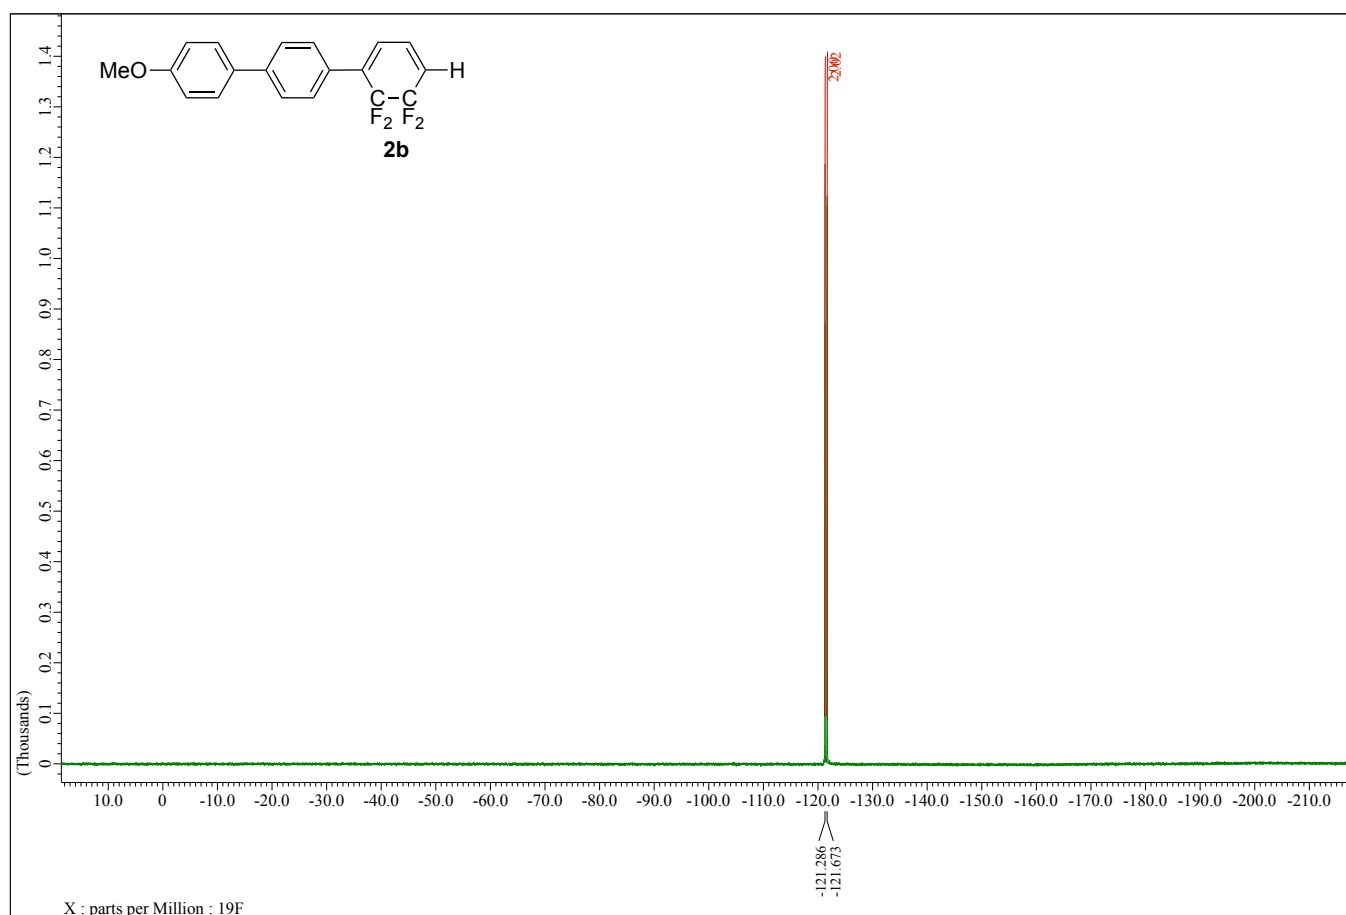

**Figure S39.** <sup>19</sup>F NMR spectrum of **2b** (CDCl<sub>3</sub>, 376 MHz).

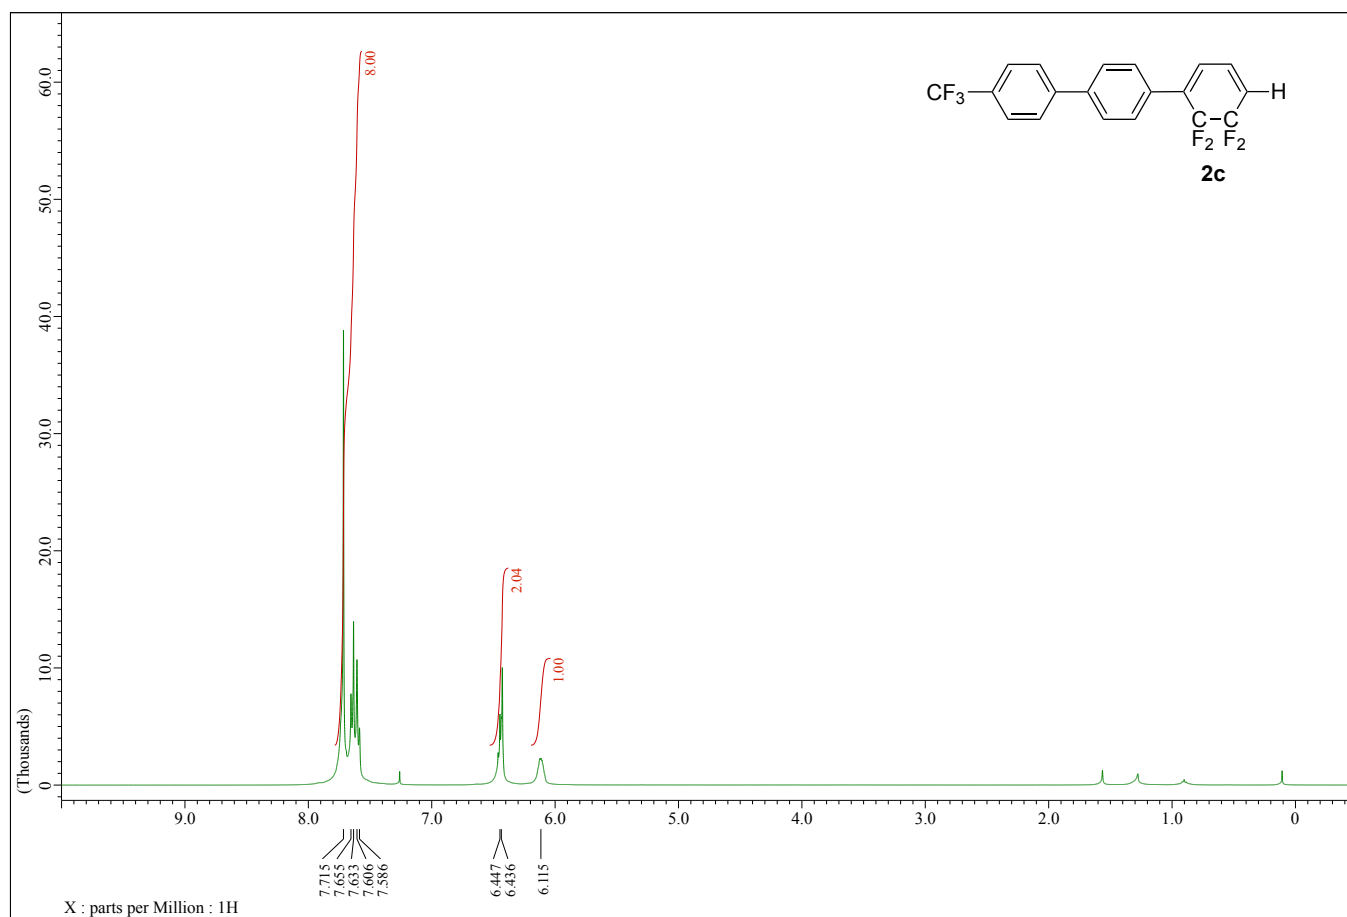

**Figure S40.** <sup>1</sup>H NMR spectrum of **2c** (CDCl<sub>3</sub>, 400 MHz).

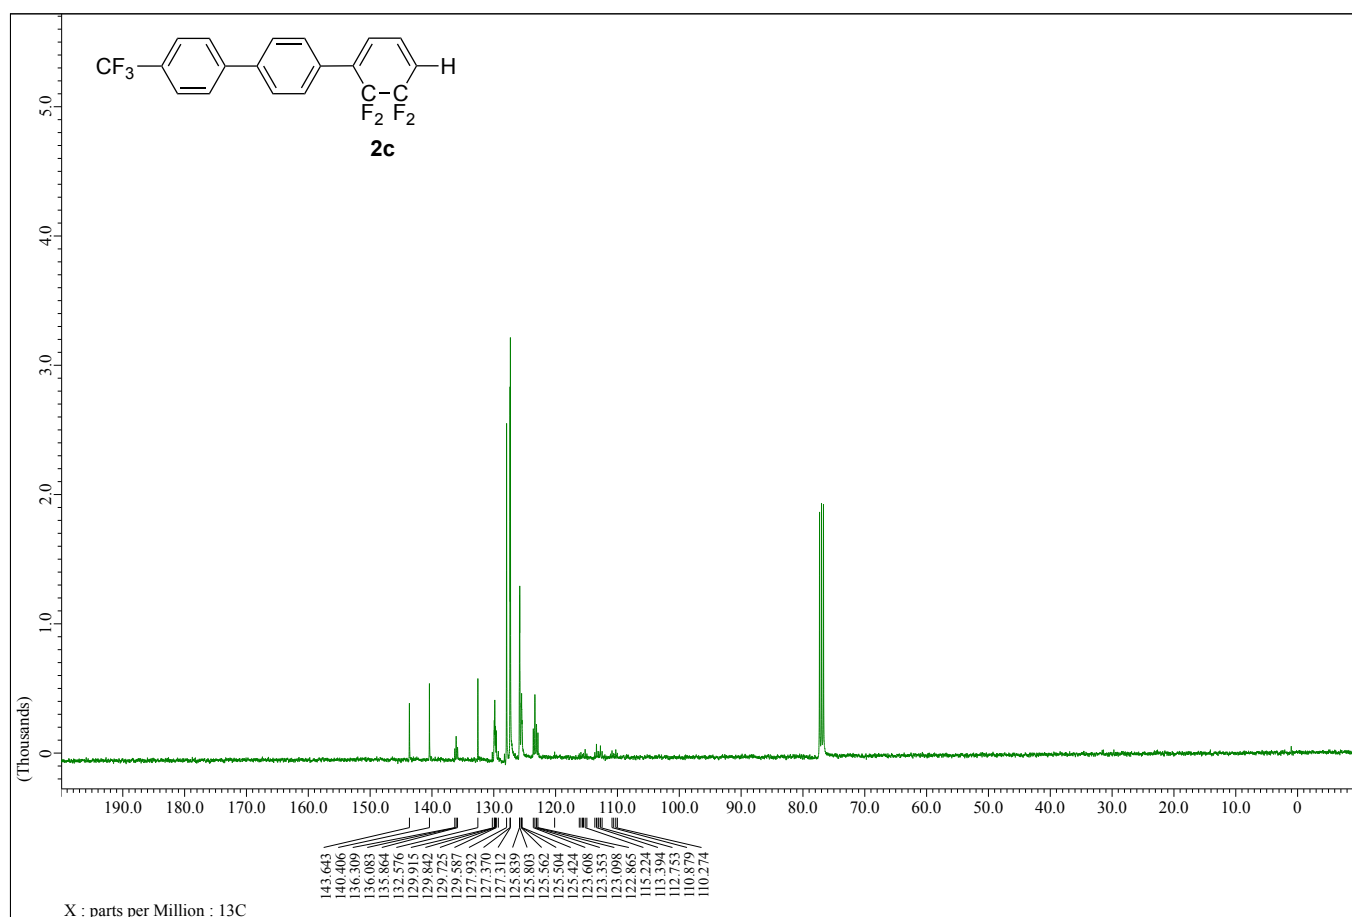

**Figure S41.** <sup>13</sup>C NMR spectrum of **2c** (CDCl<sub>3</sub>, 100 MHz).

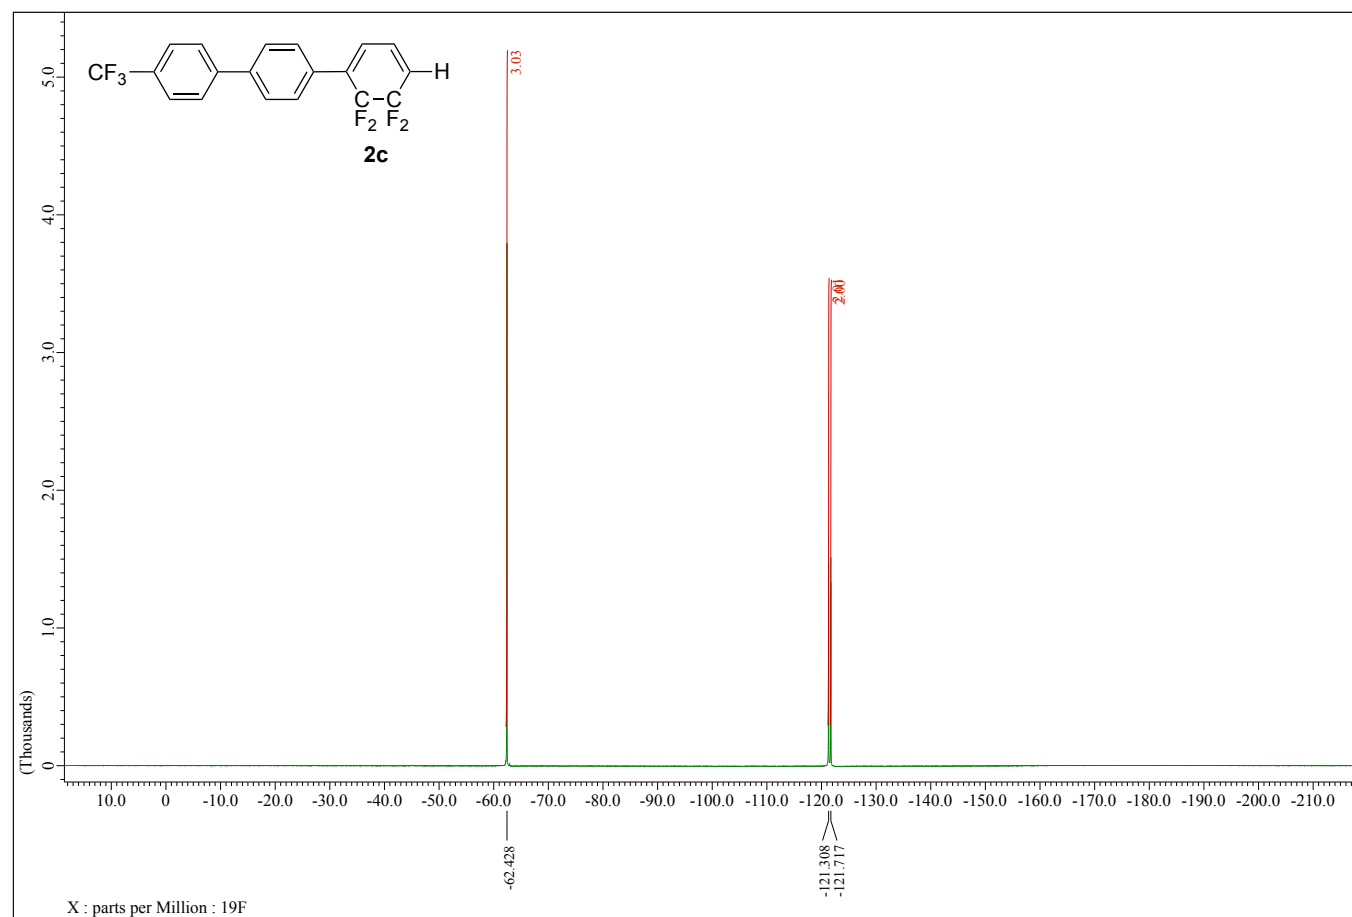

**Figure S42.** <sup>19</sup>F NMR spectrum of **2c** (CDCl<sub>3</sub>, 376 MHz).

### 3. Single crystal X-ray crystallographic analysis

Single crystal X-ray diffractions were recorded on an XtaLab AFC11 diffractometer (Rigaku). The reflection data were integrated, scaled, and averaged using CrysAlisPro (ver. 1.171.39.43a, Rigaku). Empirical absorption corrections were applied using the SCALE 3 ABSPACK scaling algorithm (CrysAlisPro). The structure was identified by a direct method (SHELXT-2018/2) and refined using a full matrix least square method (SHELXL-2014/7) visualized by Olex2. The crystallographic data were deposited into the Cambridge Crystallographic Data Centre (CCDC) database. These data can be obtained free of charge from the CCDC via [www.ccdc.cam.ac.uk/data\\_request/cif](http://www.ccdc.cam.ac.uk/data_request/cif).

**Table S1.** Crystallographic data of **2b**

|                                                                              | <b>2b</b>                                             |
|------------------------------------------------------------------------------|-------------------------------------------------------|
| CCDC #                                                                       | 2269760                                               |
| Empirical Formula                                                            | C <sub>19</sub> H <sub>14</sub> F <sub>4</sub> O      |
| Formula weight                                                               | 334.30                                                |
| Temperature [K]                                                              | 173                                                   |
| Crystal Color / Habit                                                        | Colourless / Plate                                    |
| Crystal Size [mm]                                                            | 0.305 × 0.275 × 0.153                                 |
| Crystal System                                                               | Orthorhombic                                          |
| Space Group                                                                  | <i>P</i> 2 <sub>1</sub> 2 <sub>1</sub> 2 <sub>1</sub> |
| <i>a</i> [Å]                                                                 | 5.5586(7)                                             |
| <i>b</i> [Å]                                                                 | 9.2038(15)                                            |
| <i>c</i> [Å]                                                                 | 29.282(4)                                             |
| $\alpha$ [°]                                                                 | 90                                                    |
| $\beta$ [°]                                                                  | 90                                                    |
| $\gamma$ [°]                                                                 | 90                                                    |
| <i>V</i> [Å <sup>3</sup> ]                                                   | 1498.1(4)                                             |
| <i>Z</i>                                                                     | 4                                                     |
| <i>R</i> [ <i>F</i> <sup>2</sup> > 2 <i>s</i> ( <i>F</i> <sup>2</sup> )] [a] | 0.0631                                                |
| <i>wR</i> <sub>2</sub> ( <i>F</i> <sup>2</sup> ) [b]                         | 0.1269                                                |

[a]  $R = \Sigma ||F_o| - |F_c|| / \Sigma |F_o|$ . [b]  $wR = \{[\Sigma w(|F_o| - |F_c|)] / \Sigma w|F_o|\}^{1/2}$ .

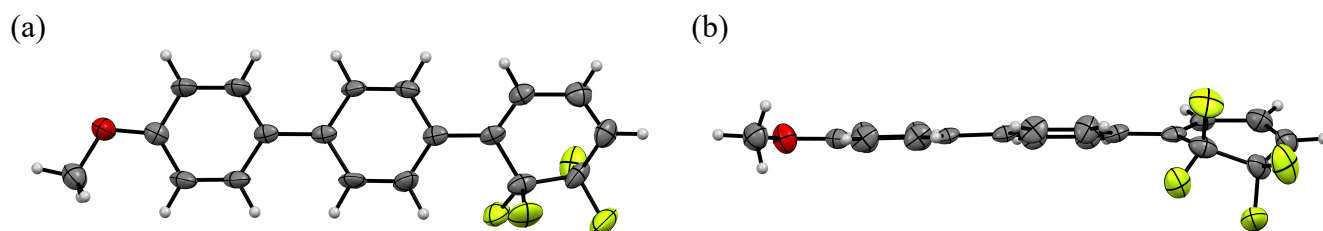

**Figure S43.** ORTEP type crystal structure of **2b** viewed from (a) top and (b) side.

#### 4. Theoretical calculations

All computations were performed using Gaussian 16 program set with the density functional theory (DFT) at the M06-2X hybrid functional and 6-31+G(d) (for all atoms) basis set with a conductor-like polarizable continuum model (CPCM) for  $\text{CHCl}_3$ . Theoretical vertical transitions were also calculated using the time-dependent DFT (TD-DFT) method at the same theory level using the same solvation model.

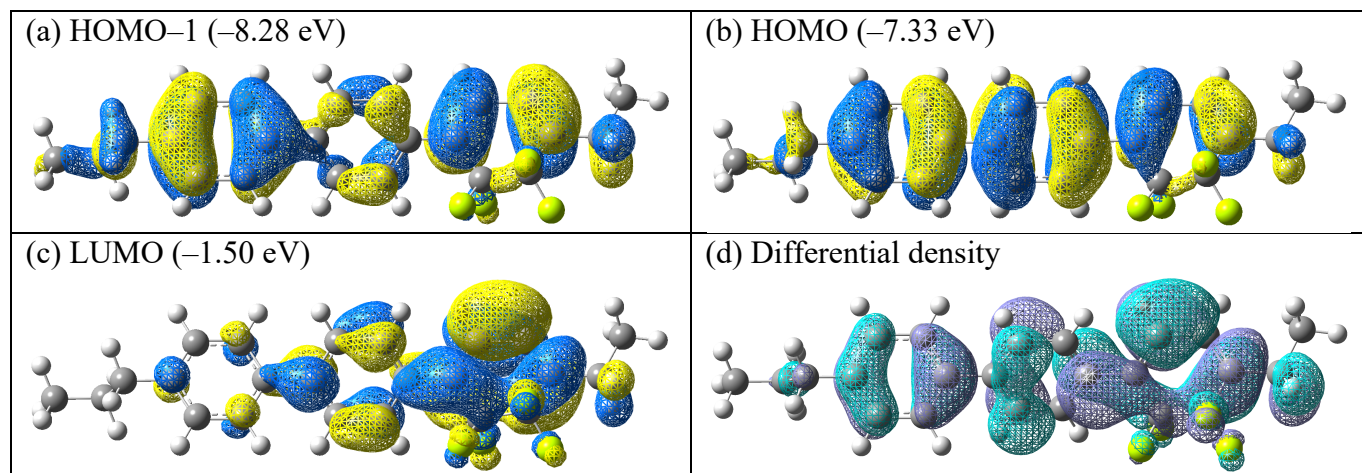

**Figure S44.** Orbital distributions for **2a** of (a) HOMO-1, (b) HOMO, (c) LUMO, and (d) differential density between HOMO and LUMO.

<Results for optimization>

SCF Done: E(RM062X) = -1288.59491896 A.U. after 9 cycles

Dipole moment (field-independent basis, Debye):

X= -0.7390 Y= 4.4663 Z= -0.9453 Tot= 4.6247

<Results for TD-SCF>

Excited State 1: Singlet-A 3.7466 eV 330.92 nm f=1.0035 <S\*\*2>=0.000

97 -> 99 0.24354

98 -> 99 0.65329

This state for optimization and/or second-order correction.

Total Energy, E(TD-HF/TD-DFT) = -1288.45723314

Copying the excited state density for this state as the 1-particle RhoCI density.



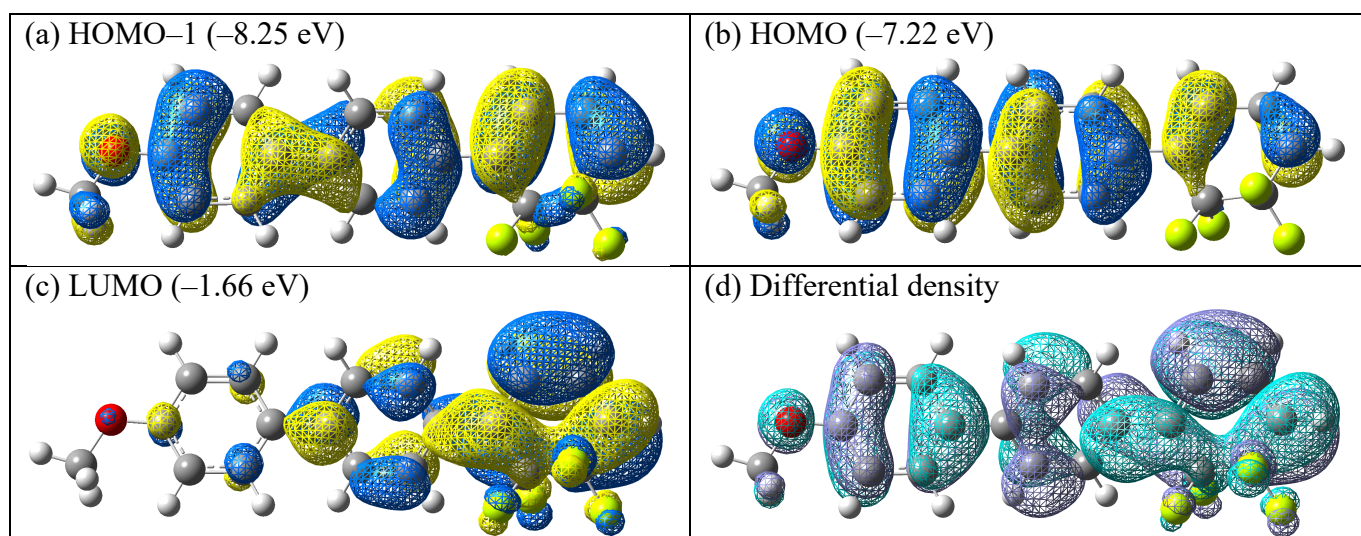

**Figure S45.** Orbital distributions for **2b** of (a) HOMO-1, (b) HOMO, (c) LUMO, and (d) differential density between HOMO and LUMO.

<Results for optimization>

SCF Done: E(RM062X) = -1206.59862518 A.U. after 9 cycles

Dipole moment (field-independent basis, Debye):

X= -2.2446 Y= 2.9557 Z= -0.6624 Tot= 3.7701

<Results for TD-SCF>

Excited State 1: Singlet-A 3.6729 eV 337.56 nm f=0.9058 <S\*\*2>=0.000

85 -> 87 0.31347

86 -> 87 0.62094

This state for optimization and/or second-order correction.

Total Energy, E(TD-HF/TD-DFT) = -1206.46364755

Copying the excited state density for this state as the 1-particle RhoCI density.

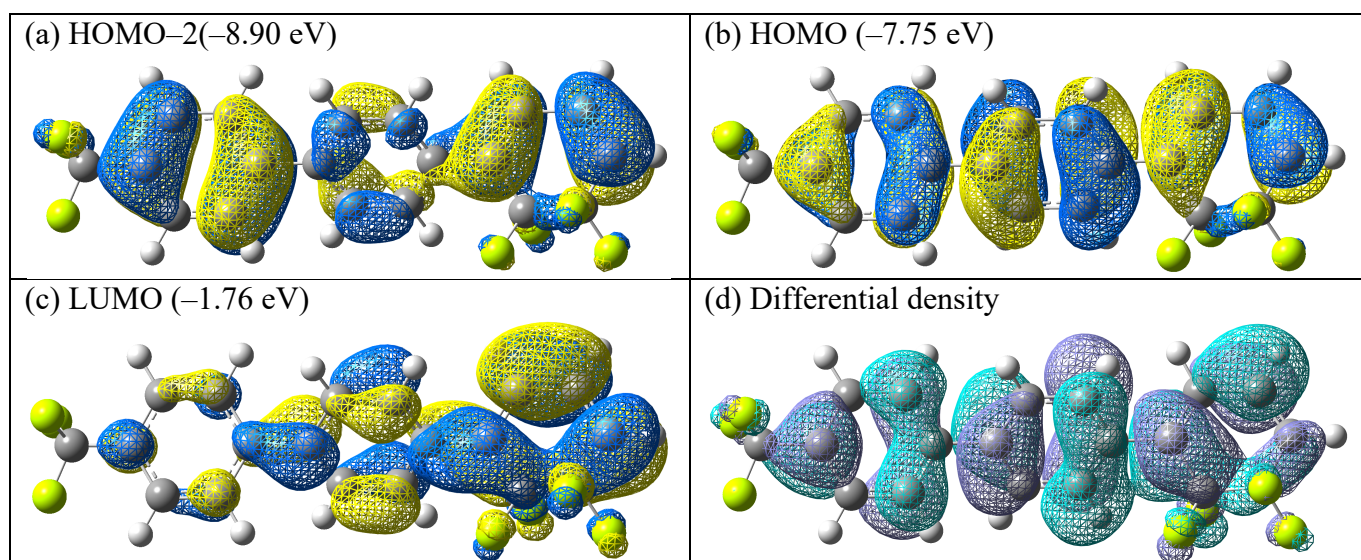

**Figure S46.** Orbital distributions for **2c** of (a) HOMO-1, (b) HOMO, (c) LUMO, and (d) differential density between HOMO and LUMO.

<Results for optimization>

SCF Done: E(RM062X) = -1429.07310820 A.U. after 9 cycles

Dipole moment (field-independent basis, Debye):

X= 2.5502 Y= 4.7785 Z= -1.0073 Tot= 5.5093

<Results for TD-SCF>

Excited State 1: Singlet-A 3.8175 eV 324.78 nm f=0.8715 <S\*\*2>=0.000

92 -> 95 0.16765

94 -> 95 0.67582

This state for optimization and/or second-order correction.

Total Energy, E(TD-HF/TD-DFT) = -1428.93281657

Copying the excited state density for this state as the 1-particle RhoCI density.

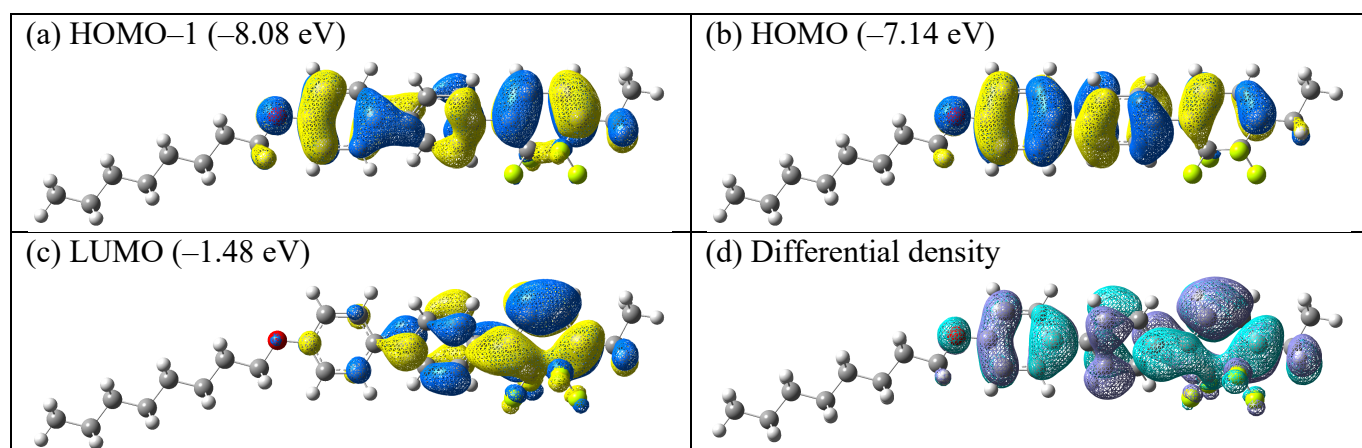

**Figure S47.** Orbital distributions for **2d** of (a) HOMO-1, (b) HOMO, (c) LUMO, and (d) differential density between HOMO and LUMO.

<Results for optimization>

SCF Done: E(RM062X) = -1560.25169787 A.U. after 8 cycles

Dipole moment (field-independent basis, Debye):

X= -0.8627 Y= 2.9669 Z= -0.4738 Tot= 3.1259

<Results for TD-SCF>

Excited State 1: Singlet-A 3.7026 eV 334.86 nm f=1.0401 <S\*\*2>=0.000

121 ->123 -0.30957

122 ->123 0.62317

This state for optimization and/or second-order correction.

Total Energy, E(TD-HF/TD-DFT) = -1560.11563017

Copying the excited state density for this state as the 1-particle RhoCI density.

**Table S2.** Cartesian coordinates of **2a**.

| No. | Atom Type |   | Coordinates (Angstroms) |           |           |    |   |   |            |           |           |
|-----|-----------|---|-------------------------|-----------|-----------|----|---|---|------------|-----------|-----------|
|     | No.       |   | x                       | y         | z         |    |   |   |            |           |           |
| 1   | 6         | 0 | -5.440033               | 1.331344  | 0.238184  | 25 | 6 | 0 | 5.421513   | 0.500706  | -0.171628 |
| 2   | 6         | 0 | -4.050677               | 1.367674  | 0.153628  | 26 | 1 | 0 | 5.074371   | 2.517716  | -0.668207 |
| 3   | 6         | 0 | -3.29405                | 0.193146  | 0.261131  | 27 | 6 | 0 | 6.920671   | 0.453699  | -0.251032 |
| 4   | 6         | 0 | -3.974887               | -1.016202 | 0.456332  | 28 | 1 | 0 | 7.303591   | 0.078162  | 0.70798   |
| 5   | 6         | 0 | -5.36415                | -1.046345 | 0.541669  | 29 | 1 | 0 | 7.204134   | -0.301905 | -0.994858 |
| 6   | 6         | 0 | -6.121125               | 0.125342  | 0.434305  | 30 | 6 | 0 | 7.57336    | 1.789305  | -0.588077 |
| 7   | 1         | 0 | -6.006759               | 2.255621  | 0.145341  | 31 | 1 | 0 | 7.337409   | 2.548843  | 0.164191  |
| 8   | 1         | 0 | -3.549568               | 2.317107  | -0.017272 | 32 | 1 | 0 | 8.659699   | 1.675482  | -0.623904 |
| 9   | 1         | 0 | -3.411521               | -1.938906 | 0.569688  | 33 | 1 | 0 | 7.242432   | 2.158781  | -1.564032 |
| 10  | 1         | 0 | -5.870257               | -1.995636 | 0.705313  | 34 | 6 | 0 | -7.62815   | 0.080846  | 0.472208  |
| 11  | 6         | 0 | -1.813436               | 0.229986  | 0.174557  | 35 | 1 | 0 | -7.958586  | -0.723146 | 1.142127  |
| 12  | 6         | 0 | -1.102343               | -0.792029 | -0.468956 | 36 | 1 | 0 | -8.017012  | 1.021039  | 0.883307  |
| 13  | 6         | 0 | -1.083668               | 1.28446   | 0.741252  | 37 | 6 | 0 | -8.236459  | -0.146541 | -0.919175 |
| 14  | 6         | 0 | 0.285338                | -0.763292 | -0.54806  | 38 | 1 | 0 | -7.842918  | -1.084646 | -1.330911 |
| 15  | 1         | 0 | -1.642499               | -1.610832 | -0.936157 | 39 | 1 | 0 | -7.900966  | 0.654849  | -1.58973  |
| 16  | 6         | 0 | 0.303278                | 1.317808  | 0.663307  | 40 | 6 | 0 | 3.278002   | -0.90645  | -0.163103 |
| 17  | 1         | 0 | -1.604947               | 2.070704  | 1.280423  | 41 | 6 | 0 | 4.735072   | -0.749901 | 0.310831  |
| 18  | 6         | 0 | 1.011325                | 0.300203  | 0.00827   | 42 | 9 | 0 | 2.712375   | -1.896783 | 0.574128  |
| 19  | 1         | 0 | 0.802627                | -1.562829 | -1.069518 | 43 | 9 | 0 | 4.716721   | -0.752198 | 1.68017   |
| 20  | 1         | 0 | 0.845925                | 2.126908  | 1.144349  | 44 | 9 | 0 | 5.413842   | -1.868176 | -0.05891  |
| 21  | 6         | 0 | 2.480217                | 0.373096  | -0.105776 | 45 | 9 | 0 | 3.320874   | -1.366321 | -1.453373 |
| 22  | 6         | 0 | 3.174387                | 1.516052  | -0.255268 | 46 | 6 | 0 | -9.762026  | -0.191909 | -0.880055 |
| 23  | 6         | 0 | 4.635352                | 1.564601  | -0.38968  | 47 | 1 | 0 | -10.181702 | -0.355165 | -1.877437 |
| 24  | 1         | 0 | 2.639578                | 2.459804  | -0.315798 | 48 | 1 | 0 | -10.111749 | -1.002045 | -0.230343 |
|     |           |   |                         |           |           | 49 | 1 | 0 | -10.170649 | 0.747814  | -0.491871 |

**Table S3.** Cartesian coordinates of **2b**.

| No. | Atom | Type | Coordinates (Angstroms) |           |           |    |   |   |           |           |           |
|-----|------|------|-------------------------|-----------|-----------|----|---|---|-----------|-----------|-----------|
|     | No.  |      | x                       | y         | z         |    |   |   |           |           |           |
| 1   | 6    | 0    | -5.270113               | 1.315999  | -0.140799 | 19 | 1 | 0 | 1.109691  | -1.387045 | -1.185198 |
| 2   | 6    | 0    | -3.886559               | 1.390381  | -0.168061 | 20 | 1 | 0 | 0.940137  | 2.318392  | 0.997641  |
| 3   | 6    | 0    | -3.092506               | 0.239076  | -0.031783 | 21 | 6 | 0 | 2.681254  | 0.613139  | -0.170581 |
| 4   | 6    | 0    | -3.74325                | -0.986146 | 0.134215  | 22 | 6 | 0 | 3.335428  | 1.781218  | -0.306876 |
| 5   | 6    | 0    | -5.135429               | -1.079363 | 0.166242  | 23 | 6 | 0 | 4.800072  | 1.871758  | -0.382082 |
| 6   | 6    | 0    | -5.904863               | 0.078338  | 0.027536  | 24 | 1 | 0 | 2.77037   | 2.703655  | -0.403012 |
| 7   | 1    | 0    | -5.882313               | 2.205055  | -0.257402 | 25 | 6 | 0 | 5.590646  | 0.828006  | -0.112096 |
| 8   | 1    | 0    | -3.412975               | 2.35655   | -0.321229 | 26 | 1 | 0 | 5.232788  | 2.826363  | -0.664211 |
| 9   | 1    | 0    | -3.15833                | -1.892609 | 0.266405  | 27 | 6 | 0 | 3.520898  | -0.646056 | -0.178752 |
| 10  | 1    | 0    | -5.598565               | -2.048915 | 0.307996  | 28 | 6 | 0 | 4.955911  | -0.443983 | 0.348757  |
| 11  | 6    | 0    | -1.612934               | 0.324757  | -0.061176 | 29 | 9 | 0 | 2.951878  | -1.640768 | 0.547886  |
| 12  | 6    | 0    | -0.841936               | -0.675888 | -0.66907  | 30 | 9 | 0 | 4.886311  | -0.461781 | 1.715661  |
| 13  | 6    | 0    | -0.941672               | 1.406729  | 0.526651  | 31 | 9 | 0 | 5.694625  | -1.526609 | -0.008667 |
| 14  | 6    | 0    | 0.545975                | -0.602097 | -0.690564 | 32 | 9 | 0 | 3.621794  | -1.11466  | -1.461226 |
| 15  | 1    | 0    | -1.334556               | -1.514198 | -1.153818 | 33 | 8 | 0 | -7.26321  | 0.102715  | 0.042567  |
| 16  | 6    | 0    | 0.445065                | 1.48754   | 0.502544  | 34 | 6 | 0 | -7.944028 | -1.130688 | 0.203905  |
| 17  | 1    | 0    | -1.509509               | 2.177942  | 1.039844  | 35 | 1 | 0 | -7.69157  | -1.595393 | 1.163342  |
| 18  | 6    | 0    | 1.21252                 | 0.489421  | -0.114449 | 36 | 1 | 0 | -9.006447 | -0.891613 | 0.182307  |
|     |      |      |                         |           |           | 37 | 1 | 0 | -7.705616 | -1.819847 | -0.613729 |
|     |      |      |                         |           |           | 38 | 1 | 0 | 6.674227  | 0.861445  | -0.143736 |

**Table S4.** Cartesian coordinates of **2c**.

| No. | Atom | Type | Coordinates (Angstroms) |           |           |    |   |   |           |           |           |
|-----|------|------|-------------------------|-----------|-----------|----|---|---|-----------|-----------|-----------|
|     | No.  |      | x                       | y         | z         |    |   |   |           |           |           |
| 1   | 6    | 0    | -4.611513               | 1.161191  | -0.169042 | 19 | 1 | 0 | 1.811235  | -1.412039 | -1.187403 |
| 2   | 6    | 0    | -3.227119               | 1.266254  | -0.199091 | 20 | 1 | 0 | 1.571158  | 2.295831  | 0.985828  |
| 3   | 6    | 0    | -2.418198               | 0.131977  | -0.030615 | 21 | 6 | 0 | 3.342655  | 0.620475  | -0.17908  |
| 4   | 6    | 0    | -3.033135               | -1.109838 | 0.168622  | 22 | 6 | 0 | 3.97289   | 1.79972   | -0.327466 |
| 5   | 6    | 0    | -4.420745               | -1.22344  | 0.199985  | 23 | 6 | 0 | 5.43582   | 1.918147  | -0.40437  |
| 6   | 6    | 0    | -5.205163               | -0.086268 | 0.030827  | 24 | 1 | 0 | 3.389707  | 2.709962  | -0.431827 |
| 7   | 1    | 0    | -5.229372               | 2.04374   | -0.309167 | 25 | 6 | 0 | 6.245574  | 0.892834  | -0.121568 |
| 8   | 1    | 0    | -2.768567               | 2.234424  | -0.377786 | 26 | 1 | 0 | 5.84998   | 2.87762   | -0.697338 |
| 9   | 1    | 0    | -2.423714               | -1.995239 | 0.323879  | 27 | 6 | 0 | 4.205701  | -0.622412 | -0.173644 |
| 10  | 1    | 0    | -4.884732               | -2.19042  | 0.362708  | 28 | 6 | 0 | 5.635447  | -0.386375 | 0.353501  |
| 11  | 6    | 0    | -0.939391               | 0.248479  | -0.062957 | 29 | 9 | 0 | 3.6537    | -1.619395 | 0.562792  |
| 12  | 6    | 0    | -0.153722               | -0.741282 | -0.667441 | 30 | 9 | 0 | 5.564171  | -0.389104 | 1.720119  |
| 13  | 6    | 0    | -0.29377                | 1.347792  | 0.518572  | 31 | 9 | 0 | 6.39552   | -1.457902 | 0.009153  |
| 14  | 6    | 0    | 1.232091                | -0.637382 | -0.694706 | 32 | 9 | 0 | 4.317529  | -1.102552 | -1.450674 |
| 15  | 1    | 0    | -0.630966               | -1.592446 | -1.144975 | 33 | 1 | 0 | 7.328361  | 0.946795  | -0.152806 |
| 16  | 6    | 0    | 1.091321                | 1.454337  | 0.494131  | 34 | 6 | 0 | -6.702801 | -0.167211 | 0.06315   |
| 17  | 1    | 0    | -0.877263               | 2.110281  | 1.027146  | 35 | 9 | 0 | -7.225109 | 0.569234  | 1.066253  |
| 18  | 6    | 0    | 1.875814                | 0.469385  | -0.122149 | 36 | 9 | 0 | -7.256553 | 0.305493  | -1.07274  |
|     |      |      |                         |           |           | 37 | 9 | 0 | -7.152187 | -1.422087 | 0.225297  |

**Table S5.** Cartesian coordinates of **2d**.

| No. | Atom | Type | Coordinates (Angstroms) |           |           | 33 | 1 | 0 | 10.319724  | 1.485171  | -1.171892 |
|-----|------|------|-------------------------|-----------|-----------|----|---|---|------------|-----------|-----------|
|     | No.  | x    | y                       | z         | 34        |    |   |   |            |           |           |
| 1   | 6    | 0    | -2.454075               | 2.279396  | -0.115227 | 35 | 6 | 0 | 7.334831   | -1.14715  | 0.385332  |
| 2   | 6    | 0    | -1.076261               | 2.129284  | -0.121481 | 36 | 9 | 0 | 5.166495   | -2.024002 | 0.463916  |
| 3   | 6    | 0    | -0.481722               | 0.857394  | -0.064422 | 37 | 9 | 0 | 7.225738   | -1.210652 | 1.74901   |
| 4   | 6    | 0    | -1.326196               | -0.253965 | 0.00074   | 38 | 9 | 0 | 7.884759   | -2.32785  | -0.003791 |
| 5   | 6    | 0    | -2.71545                | -0.121408 | 0.00939   | 39 | 9 | 0 | 5.972499   | -1.485905 | -1.491334 |
| 6   | 6    | 0    | -3.285318               | 1.153203  | -0.048912 | 40 | 8 | 0 | -4.621587  | 1.397558  | -0.047028 |
| 7   | 1    | 0    | -2.911455               | 3.262621  | -0.170163 | 41 | 6 | 0 | -5.508419  | 0.285243  | 0.00957   |
| 8   | 1    | 0    | -0.449532               | 3.014159  | -0.195375 | 42 | 1 | 0 | -5.32226   | -0.2866   | 0.929203  |
| 9   | 1    | 0    | -0.899033               | -1.25094  | 0.07049   | 43 | 1 | 0 | -5.325961  | -0.373721 | -0.850606 |
| 10  | 1    | 0    | -3.33202                | -1.010512 | 0.07137   | 44 | 6 | 0 | -6.928569  | 0.81599   | -0.013628 |
| 11  | 6    | 0    | 0.992626                | 0.702309  | -0.070131 | 45 | 1 | 0 | -7.069371  | 1.492835  | 0.838327  |
| 12  | 6    | 0    | 1.605451                | -0.367461 | -0.737489 | 46 | 1 | 0 | -7.071152  | 1.408706  | -0.92585  |
| 13  | 6    | 0    | 1.81702                 | 1.617199  | 0.600675  | 47 | 6 | 0 | -7.956061  | -0.313796 | 0.041152  |
| 14  | 6    | 0    | 2.987134                | -0.520609 | -0.736246 | 48 | 1 | 0 | -7.800164  | -0.908582 | 0.952187  |
| 15  | 1    | 0    | 0.995009                | -1.079094 | -1.286549 | 49 | 1 | 0 | -7.798451  | -0.994661 | -0.807192 |
| 16  | 6    | 0    | 3.198788                | 1.47039   | 0.60062   | 50 | 6 | 0 | -9.395756  | 0.197324  | 0.014458  |
| 17  | 1    | 0    | 1.370321                | 2.434815  | 1.159853  | 51 | 1 | 0 | -9.555268  | 0.877261  | 0.863406  |
| 18  | 6    | 0    | 3.808899                | 0.404337  | -0.075383 | 52 | 1 | 0 | -9.551663  | 0.79415   | -0.895468 |
| 19  | 1    | 0    | 3.427824                | -1.352302 | -1.277519 | 53 | 6 | 0 | -10.42943  | -0.926413 | 0.065269  |
| 20  | 1    | 0    | 3.810471                | 2.172864  | 1.16011   | 54 | 1 | 0 | -10.267391 | -1.606837 | -0.783218 |
| 21  | 6    | 0    | 5.278849                | 0.285757  | -0.101695 | 55 | 1 | 0 | -10.272565 | -1.52311  | 0.975487  |
| 22  | 6    | 0    | 6.124694                | 1.331344  | -0.146035 | 56 | 6 | 0 | -11.870279 | -0.419538 | 0.036841  |
| 23  | 6    | 0    | 7.585173                | 1.190028  | -0.191332 | 57 | 1 | 0 | -12.033514 | 0.260613  | 0.885511  |
| 24  | 1    | 0    | 5.722327                | 2.339789  | -0.18426  | 58 | 1 | 0 | -12.027615 | 0.177911  | -0.87299  |
| 25  | 6    | 0    | 8.209287                | 0.021258  | 0.013833  | 59 | 6 | 0 | -12.905226 | -1.542655 | 0.086235  |
| 26  | 1    | 0    | 8.162482                | 2.087644  | -0.390916 | 60 | 1 | 0 | -12.740927 | -2.221418 | -0.761376 |
| 27  | 6    | 0    | 9.691345                | -0.222885 | 0.02059   | 61 | 1 | 0 | -12.747634 | -2.138186 | 0.995442  |
| 28  | 1    | 0    | 9.957655                | -0.69263  | 0.977518  | 62 | 6 | 0 | -14.340663 | -1.020953 | 0.056108  |
| 29  | 1    | 0    | 9.922053                | -0.972657 | -0.747006 | 63 | 1 | 0 | -15.06759  | -1.838475 | 0.092651  |
| 30  | 6    | 0    | 10.534208               | 1.027675  | -0.200736 | 64 | 1 | 0 | -14.533404 | -0.361114 | 0.909684  |
| 31  | 1    | 0    | 10.350568               | 1.774602  | 0.578273  | 65 | 1 | 0 | -14.527025 | -0.445666 | -0.8579   |
| 32  | 1    | 0    | 11.596273               | 0.770927  | -0.178775 |    |   |   |            |           |           |

## Photophysical properties

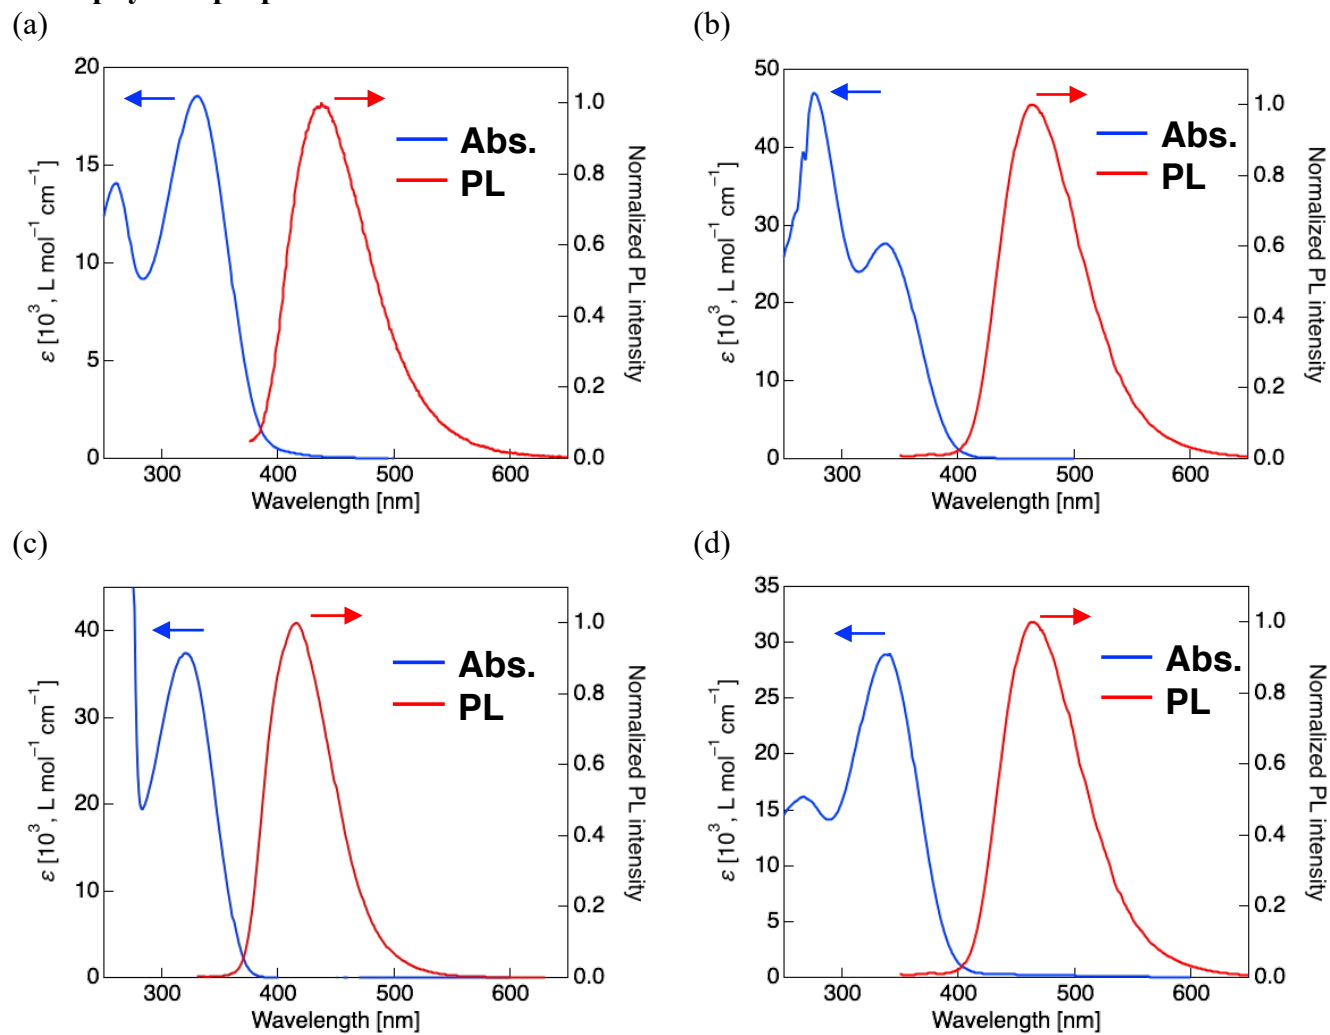

**Figure S48.** UV-vis absorption and PL spectra of (a) **2a**, (b) **2b**, (c) **2c**, and (d) **2d** in  $\text{CHCl}_3$  solution. Concentration:  $1.0 \times 10^{-5} \text{ mol L}^{-1}$  for Abs. and  $1.0 \times 10^{-6} \text{ mol L}^{-1}$  for PL measurement.



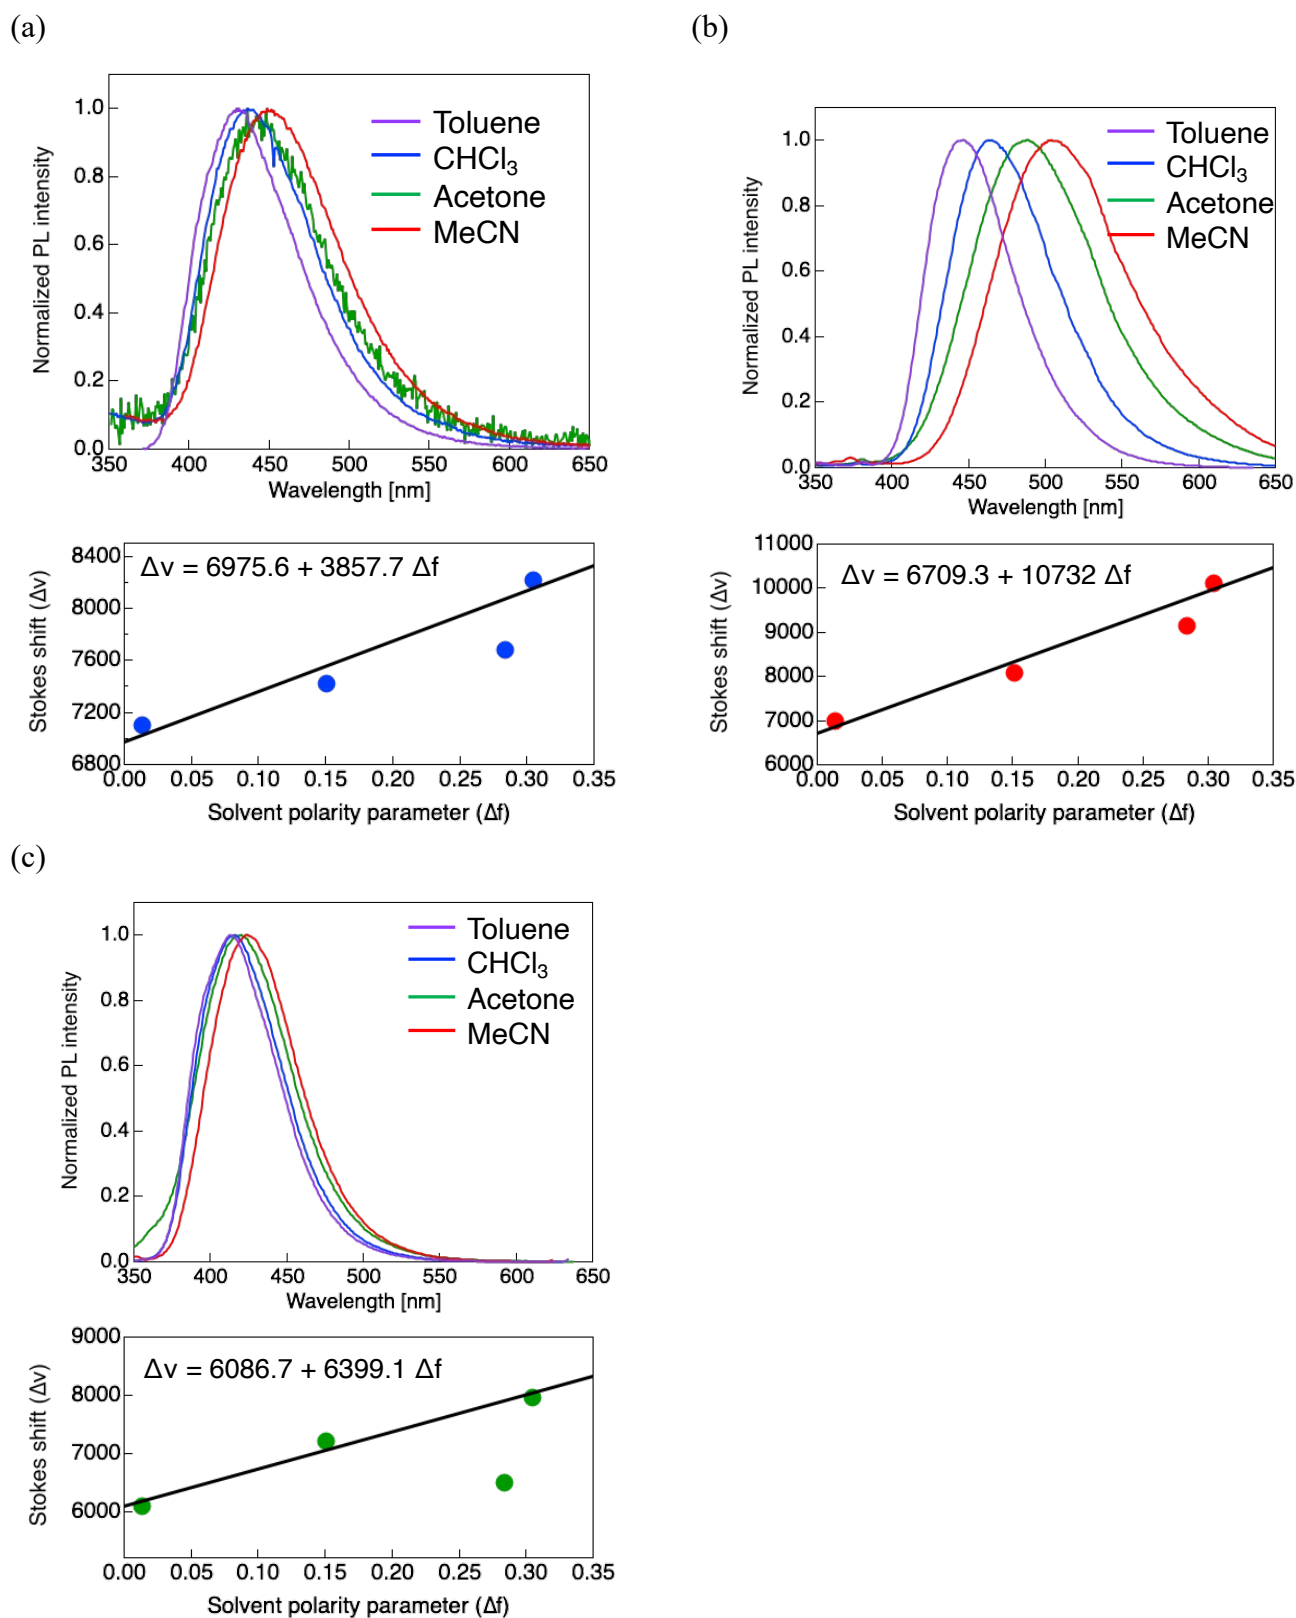

**Figure S49.** PL spectra of (a) **2a**, (b) **2b**, and (c) **2c** in a different solvent. Lippert-Mataga plot obtained from Stokes shift and solvent polarity parameter ( $\Delta f$ ).

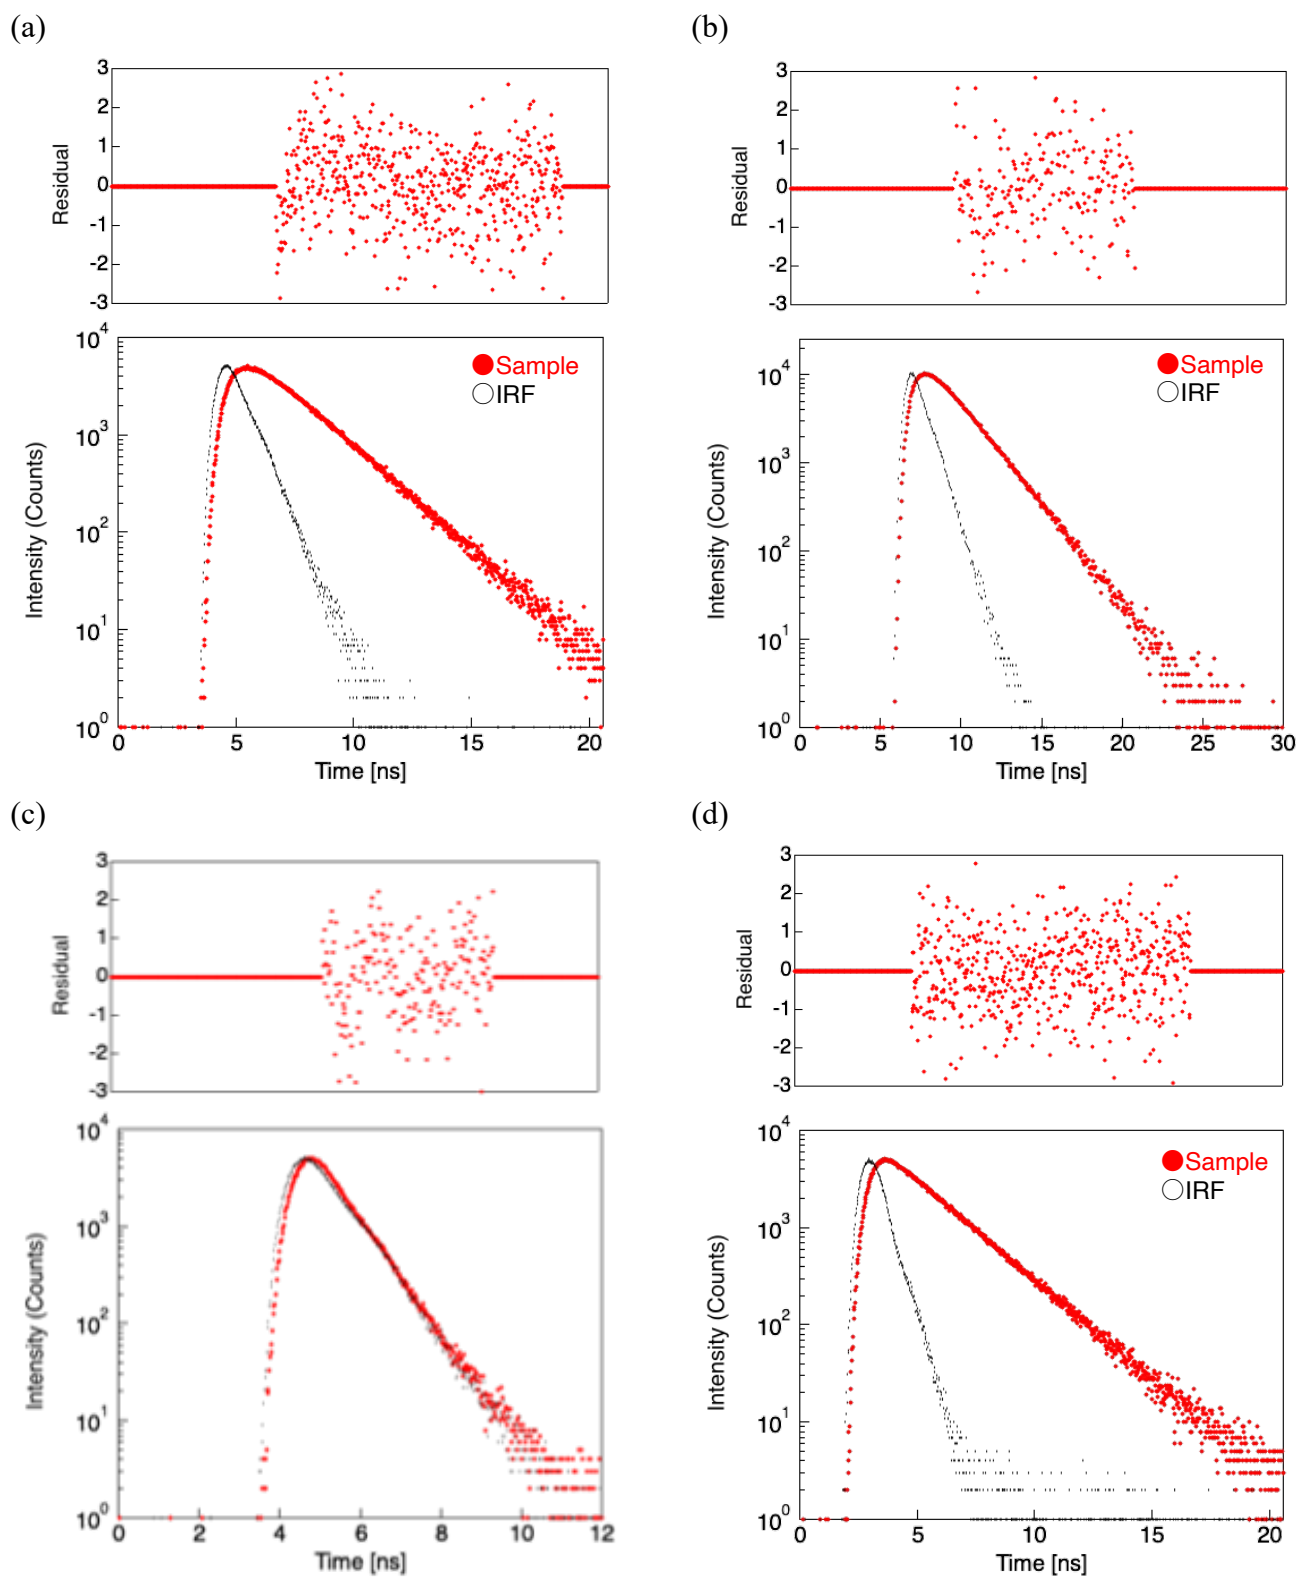

**Figure S50.** PL decay profiles of (a) **2a** ( $\lambda_{\text{ex}} = 340$  nm,  $\lambda_{\text{PL}} = 450$  nm), (b) **2b** ( $\lambda_{\text{ex}} = 340$  nm,  $\lambda_{\text{PL}} = 470$  nm), (c) **2c** ( $\lambda_{\text{ex}} = 340$  nm,  $\lambda_{\text{PL}} = 416$  nm), and (d) **2d** ( $\lambda_{\text{ex}} = 365$  nm,  $\lambda_{\text{PL}} = 460$  nm) in  $\text{CHCl}_3$  solution.

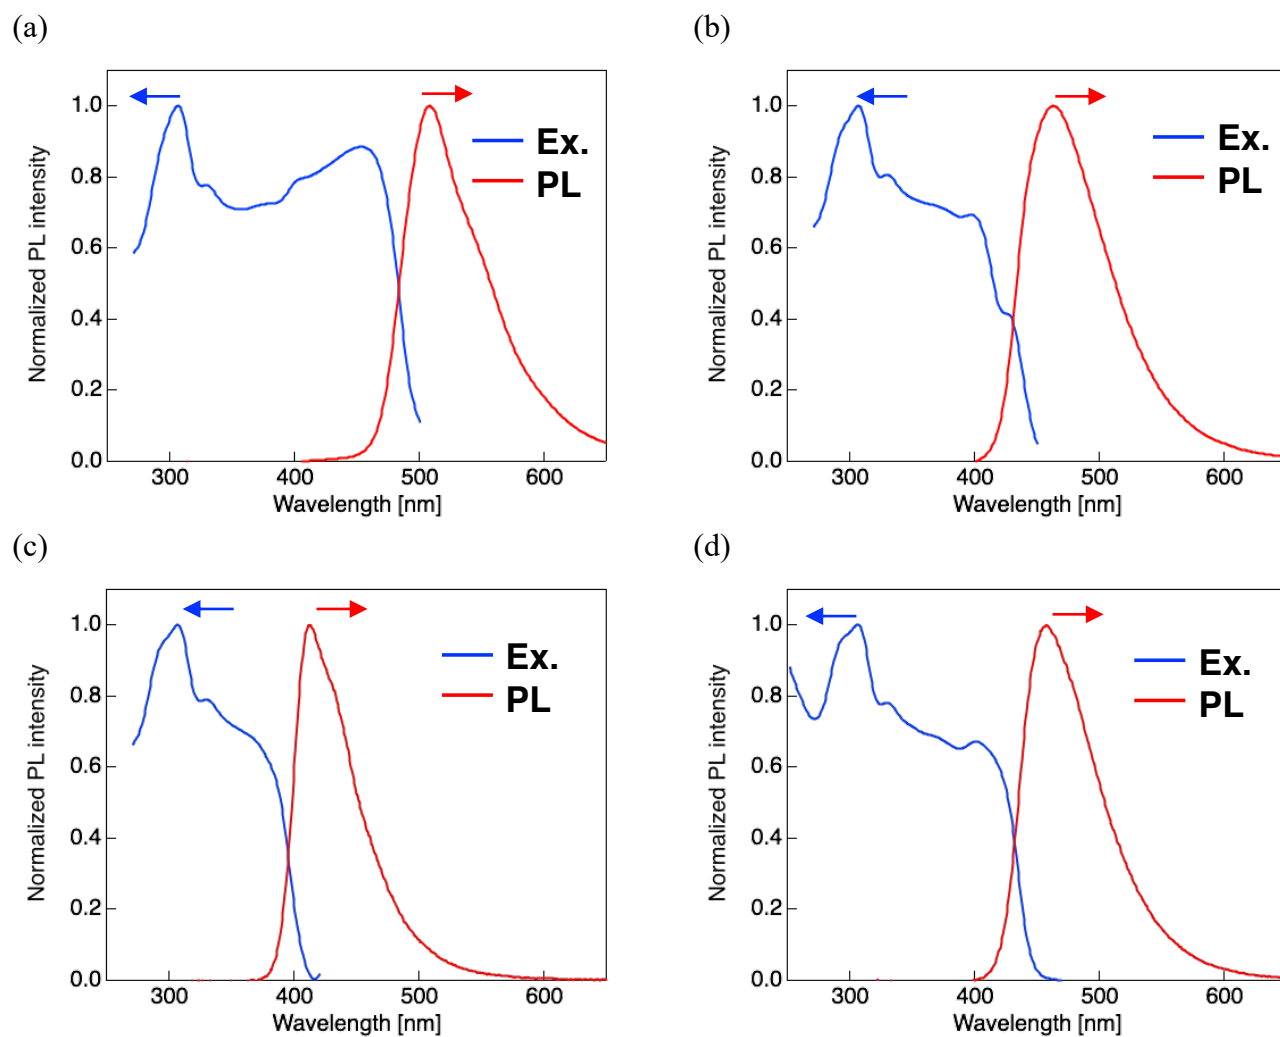

**Figure S51.** Excitation and PL spectra of (a) **2a**, (b) **2b**, (c) **2c**, and (d) **2d** in crystalline states. Detected IPL for excitation spectra was 307 nm for **2a–c**, and 306 nm for **2d**.

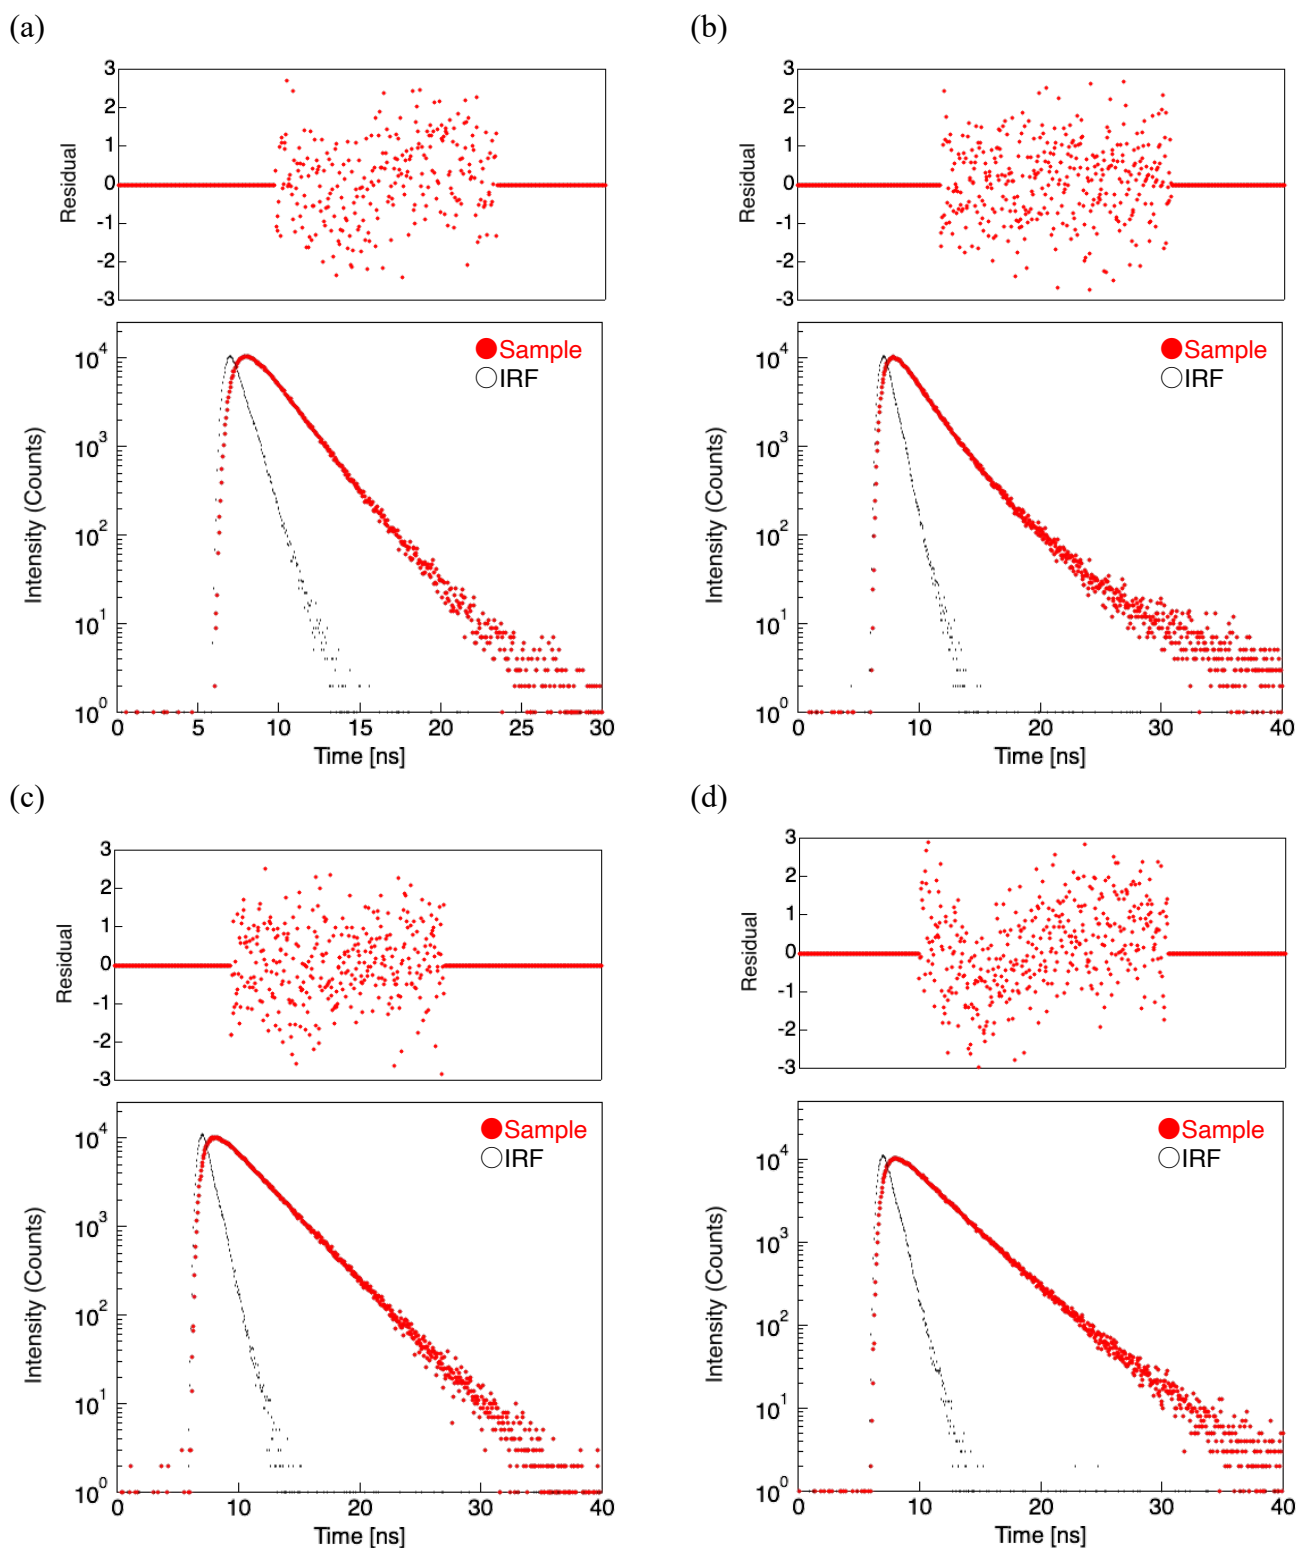

**Figure S52.** PL decay profiles of (a) **2a** ( $\lambda_{\text{ex}} = 340$  nm,  $\lambda_{\text{PL}} = 500$  nm), (b) **2b** ( $\lambda_{\text{ex}} = 340$  nm,  $\lambda_{\text{PL}} = 445$  nm), (c) **2c** ( $\lambda_{\text{ex}} = 340$  nm,  $\lambda_{\text{PL}} = 415$  nm), and (d) **2d** ( $\lambda_{\text{ex}} = 340$  nm,  $\lambda_{\text{PL}} = 450$  nm) in crystalline states.

## Phase transition properties

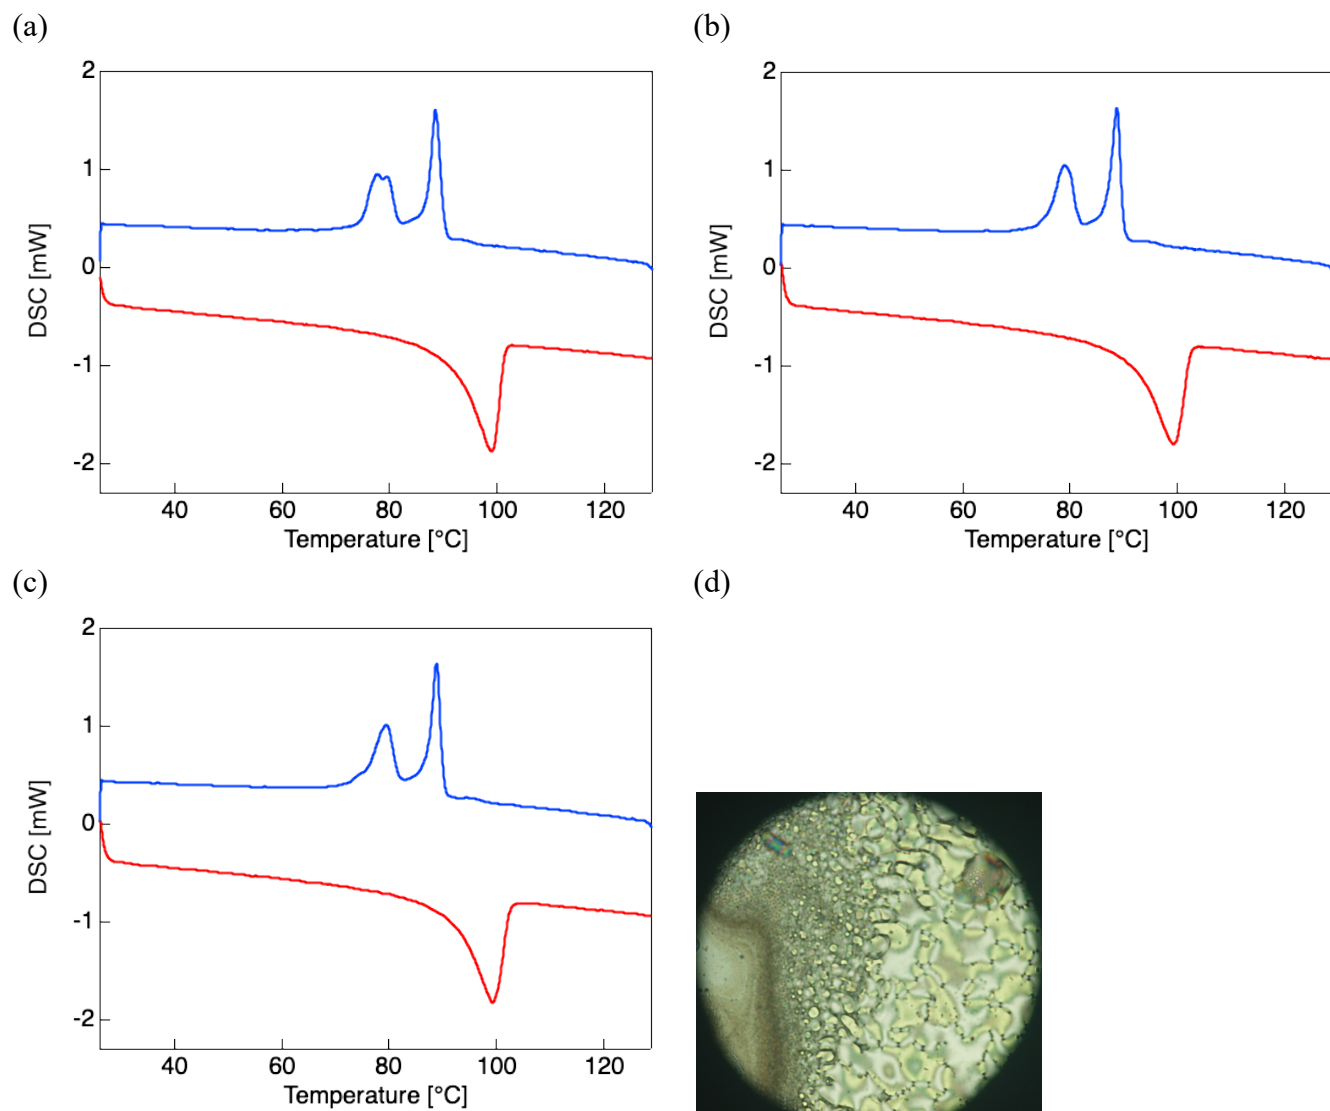

**Figure S53.** DSC thermograms for **2a** in (a) 1<sup>st</sup> cycle, (b) 2<sup>nd</sup> cycle, and (c) 3<sup>rd</sup> cycle. (d) Optical texture image observed by POM at 93 °C (N phase).

**Table S6.** Phase transition behavior of **2a** observed by DSC measurement.

| Molecule  | Phase sequence          |         | Temperature [°C] | Enthalpy ( $\Delta H$ ) [kJ mol <sup>-1</sup> ] | Entropy ( $\Delta S$ ) [J mol <sup>-1</sup> K <sup>-1</sup> ] |
|-----------|-------------------------|---------|------------------|-------------------------------------------------|---------------------------------------------------------------|
| <b>2a</b> | 1 <sup>st</sup> Heating | Cry-Iso | 92               | 17.1                                            | 46.8                                                          |
|           | 1 <sup>st</sup> Cooling | Iso-N   | 90               | -6.2                                            | -17.1                                                         |
|           |                         | N-Cry   | 81               | -4.9                                            | -13.9                                                         |
|           | 2 <sup>nd</sup> Heating | Cry-Iso | 91               | 17.2                                            | 47.3                                                          |
|           | 2 <sup>nd</sup> Cooling | Iso-N   | 90               | -6.4                                            | -17.6                                                         |
|           |                         | N-Iso   | 81               | -5.1                                            | -14.5                                                         |
|           | 3 <sup>rd</sup> Heating | Cry-Iso | 92               | 17.2                                            | 47.2                                                          |
|           | 3 <sup>rd</sup> Cooling | Iso-N   | 90               | -6.0                                            | -16.5                                                         |
|           |                         | N-Cry   | 81               | -4.82                                           | -13.6                                                         |

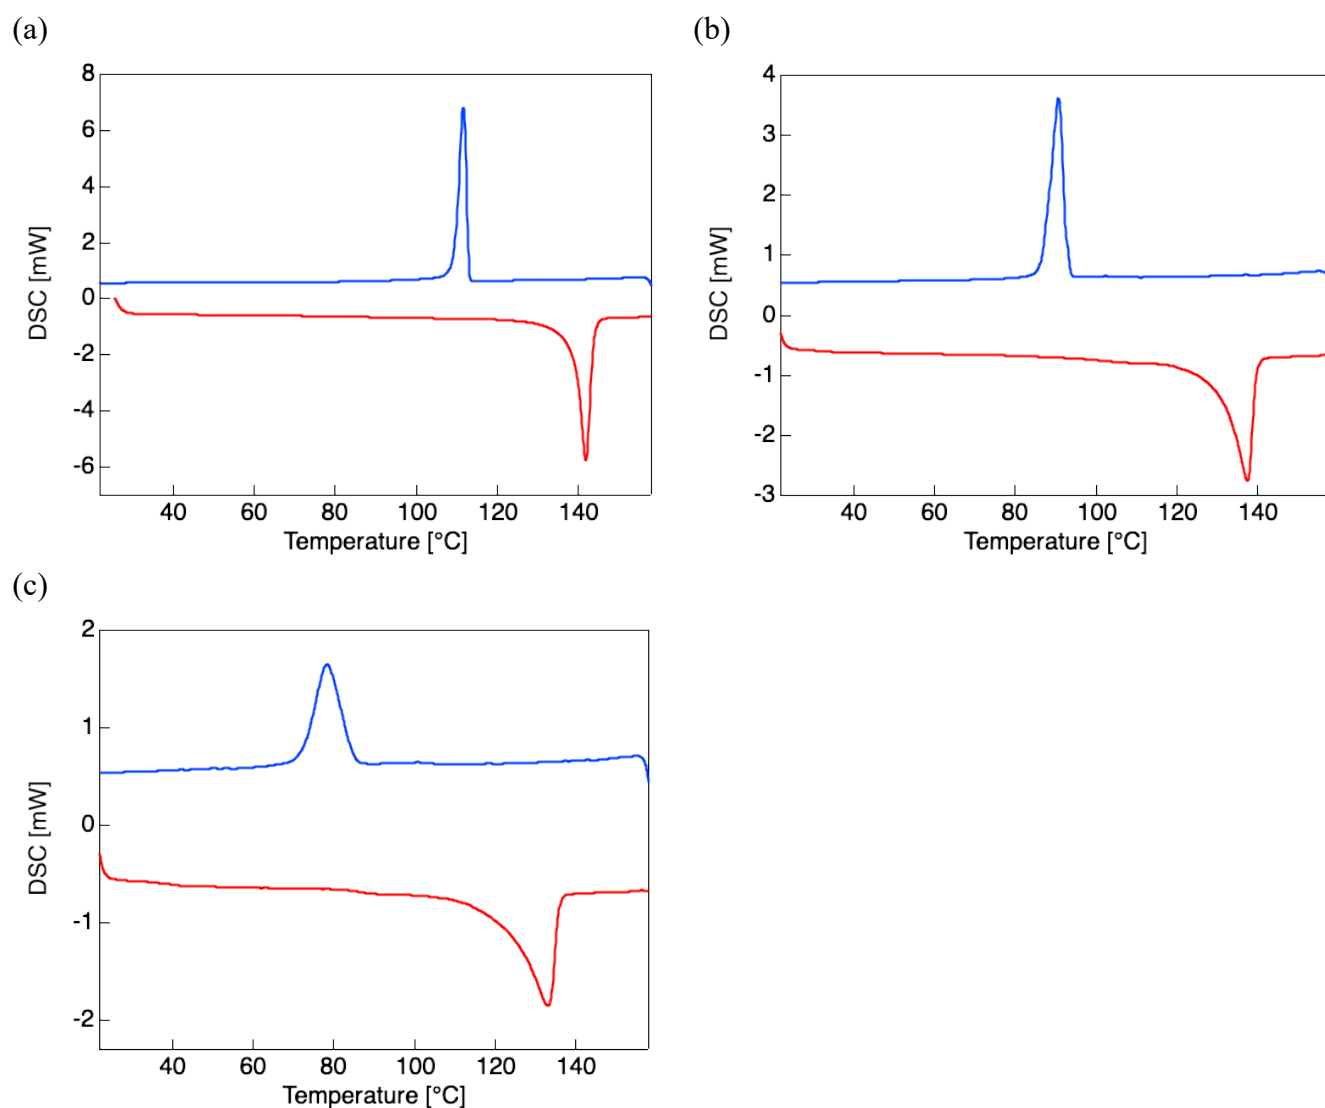

**Figure S54.** DSC thermograms for **2b** in (a) 1<sup>st</sup> cycle, (b) 2<sup>nd</sup> cycle, and (c) 3<sup>rd</sup> cycle.

**Table S7.** Phase transition behavior of **2b** observed by DSC measurement.

| Molecule  | Phase sequence          |         | Temperature<br>[°C] | Enthalpy ( $\Delta H$ )<br>[kJ mol <sup>-1</sup> ] | Entropy ( $\Delta S$ )<br>[J mol <sup>-1</sup> K <sup>-1</sup> ] |
|-----------|-------------------------|---------|---------------------|----------------------------------------------------|------------------------------------------------------------------|
| <b>2b</b> | 1 <sup>st</sup> Heating | Cry-Iso | 139                 | 23.6                                               | 57.3                                                             |
|           | 1 <sup>st</sup> Cooling | Iso-Cry | 113                 | -15.5                                              | -40.1                                                            |
|           | 2 <sup>nd</sup> Heating | Cry-Iso | 130                 | 16.4                                               | 40.6                                                             |
|           | 2 <sup>nd</sup> Cooling | Iso-Cry | 93                  | -12.1                                              | -33.0                                                            |
|           | 3 <sup>rd</sup> Heating | Cry-Iso | 122                 | 13.3                                               | 33.7                                                             |
|           | 3 <sup>rd</sup> Cooling | Iso-Cry | 85                  | -8.6                                               | -23.9                                                            |

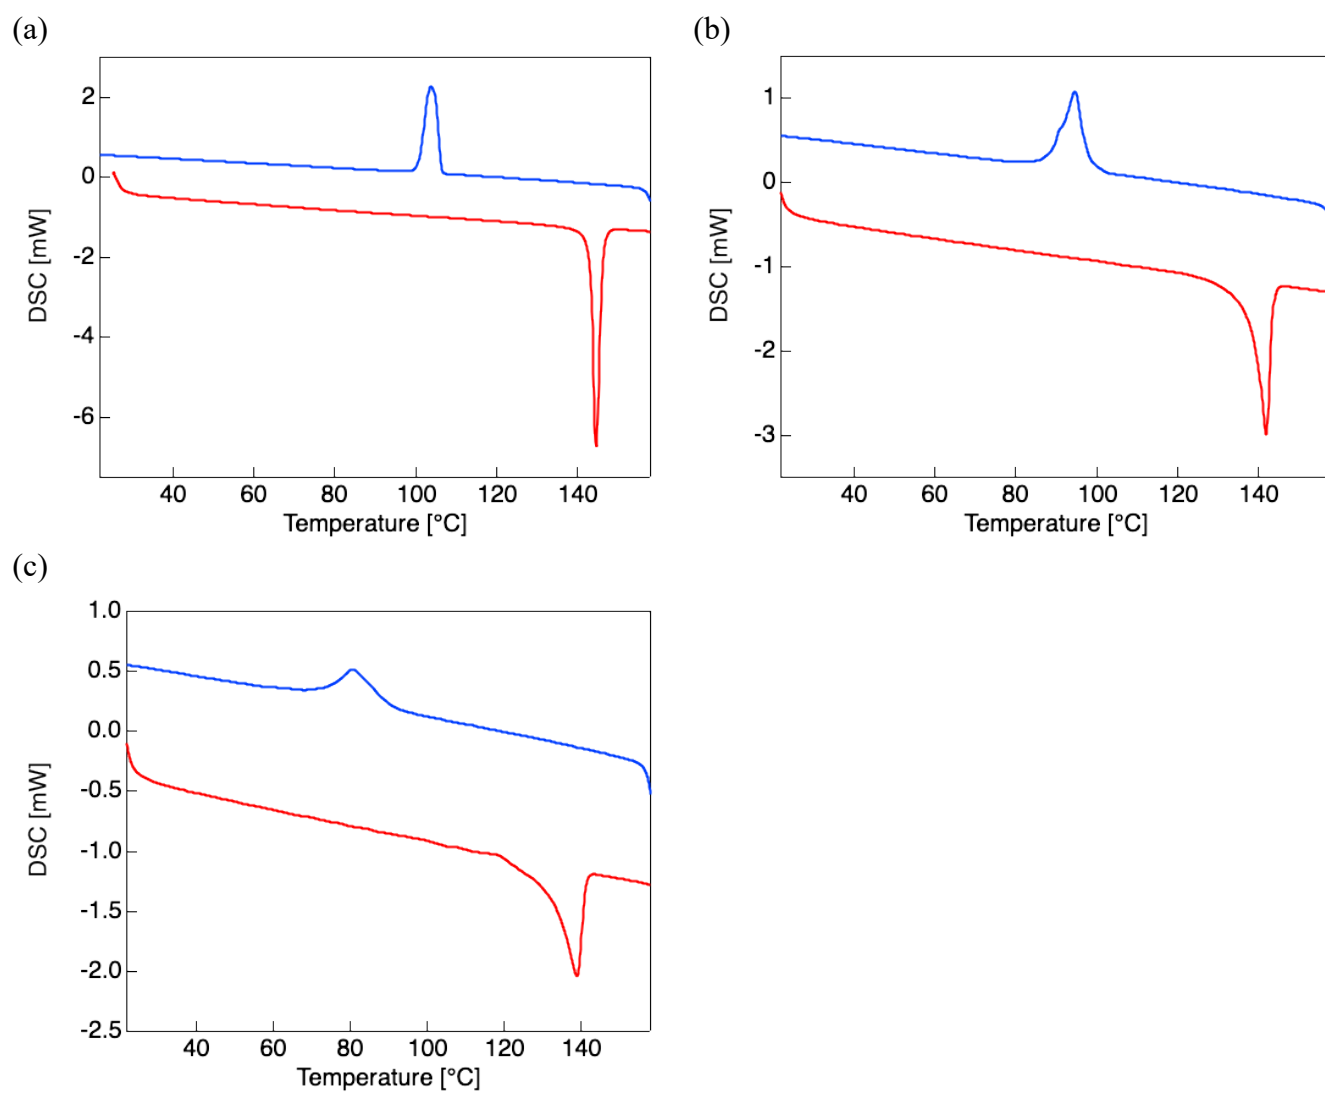

**Figure S55.** DSC thermograms for **2c** in (a) 1<sup>st</sup> cycle, (b) 2<sup>nd</sup> cycle, and (c) 3<sup>rd</sup> cycle.

**Table S8.** Phase transition behavior of **2c** observed by DSC measurement.

| Molecule  | Phase sequence          |         | Temperature<br>[°C] | Enthalpy ( $\Delta H$ )<br>[kJ mol <sup>-1</sup> ] | Entropy ( $\Delta S$ )<br>[J mol <sup>-1</sup> K <sup>-1</sup> ] |
|-----------|-------------------------|---------|---------------------|----------------------------------------------------|------------------------------------------------------------------|
| <b>2c</b> | 1 <sup>st</sup> Heating | Cry-Iso | 143                 | 16.3                                               | 39.2                                                             |
|           | 1 <sup>st</sup> Cooling | Iso-Cry | 106                 | -11.4                                              | -30.2                                                            |
|           | 2 <sup>nd</sup> Heating | Cry-Iso | 138                 | 11.8                                               | 28.6                                                             |
|           | 2 <sup>nd</sup> Cooling | Iso-Cry | 98                  | -8.16                                              | -22.0                                                            |
|           | 3 <sup>rd</sup> Heating | Cry-Iso | 132                 | 9.70                                               | 23.9                                                             |
|           | 3 <sup>rd</sup> Cooling | Iso-Cry | 90                  | -4.22                                              | -11.6                                                            |

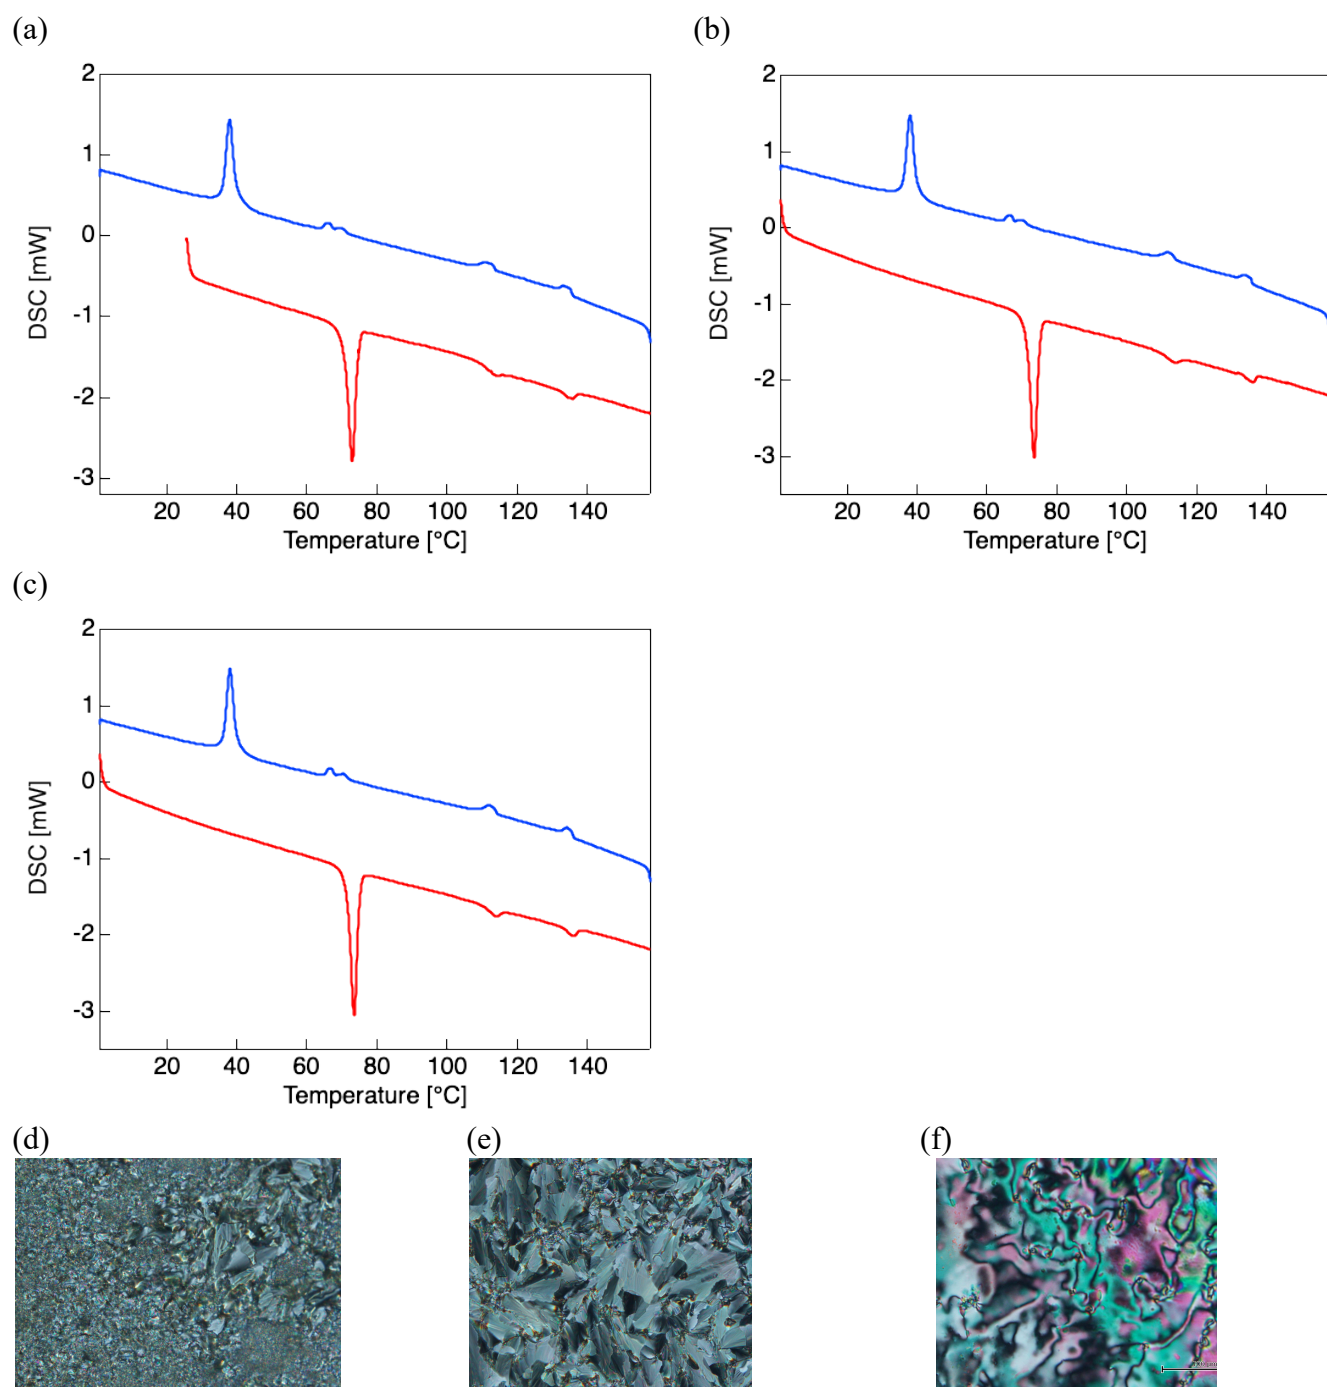

**Figure S56.** DSC thermograms for **2d** in (a) 1<sup>st</sup> cycle, (b) 2<sup>nd</sup> cycle, and (c) 3<sup>rd</sup> cycle. Optical texture images observed by POM at (d) 73 °C (SmC phase), (e) 110 °C (SmA phase), and (f) 133 °C (N phase).



**Table S9.** Phase transition behavior of **2d** observed by DSC measurement.

| Molecule  | Phase sequence          |         | Temperature<br>[°C] | Enthalpy ( $\Delta H$ )<br>[kJ mol <sup>-1</sup> ] | Entropy ( $\Delta S$ )<br>[J mol <sup>-1</sup> K <sup>-1</sup> ] |
|-----------|-------------------------|---------|---------------------|----------------------------------------------------|------------------------------------------------------------------|
|           |                         |         |                     |                                                    |                                                                  |
| <b>2d</b> | 1 <sup>st</sup> Heating | Cry-SmA | 71                  | 12.3                                               | 35.8                                                             |
|           |                         | SmA-N   | 111                 | 0.93                                               | 2.43                                                             |
|           |                         | N-Iso   | 133                 | 0.58                                               | 1.24                                                             |
|           | 1 <sup>st</sup> Cooling | Iso-N   | 136                 | -0.78                                              | -1.91                                                            |
|           |                         | N-SmA   | 114                 | -1.06                                              | -2.74                                                            |
|           |                         | SmA-SmC | 68                  | -1.14                                              | -3.35                                                            |
|           |                         | SmC-Cry | 40                  | -8.23                                              | -26.30                                                           |
|           | 2 <sup>nd</sup> Heating | Cry-SmA | 71                  | 12.6                                               | 36.5                                                             |
|           |                         | SmA-N   | 110                 | 0.88                                               | 2.28                                                             |
|           |                         | N-Iso   | 133                 | 0.72                                               | 1.77                                                             |
|           | 2 <sup>nd</sup> Cooling | Iso-N   | 136                 | -0.85                                              | -2.08                                                            |
|           |                         | N-SmA   | 114                 | -1.02                                              | -2.63                                                            |
|           |                         | SmA-SmC | 68                  | -1.12                                              | -3.28                                                            |
|           |                         | SmC-Cry | 40                  | -8.09                                              | -25.84                                                           |
|           | 3 <sup>rd</sup> Heating | Cry-SmA | 71                  | 12.49                                              | 36.26                                                            |
|           |                         | SmA-N   | 110                 | 0.94                                               | 2.45                                                             |
|           |                         | N-Iso   | 134                 | 0.70                                               | 1.72                                                             |
|           | 3 <sup>rd</sup> Cooling | Iso-N   | 136                 | -0.76                                              | -1.84                                                            |
|           |                         | N-SmA   | 114                 | -0.98                                              | -2.53                                                            |
|           |                         | SmA-SmC | 68                  | -1.13                                              | -3.32                                                            |
|           |                         | SmC-Cry | 40                  | -7.69                                              | -24.57                                                           |

# VT-PXRD measurements of 2a and 2d

(a)

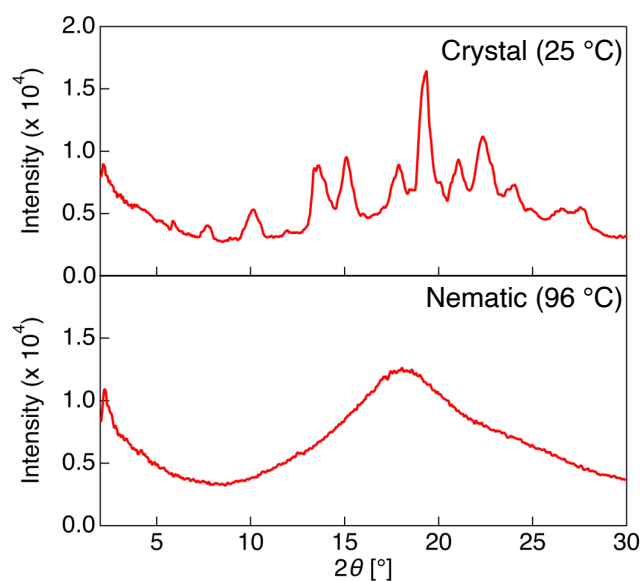

(b)

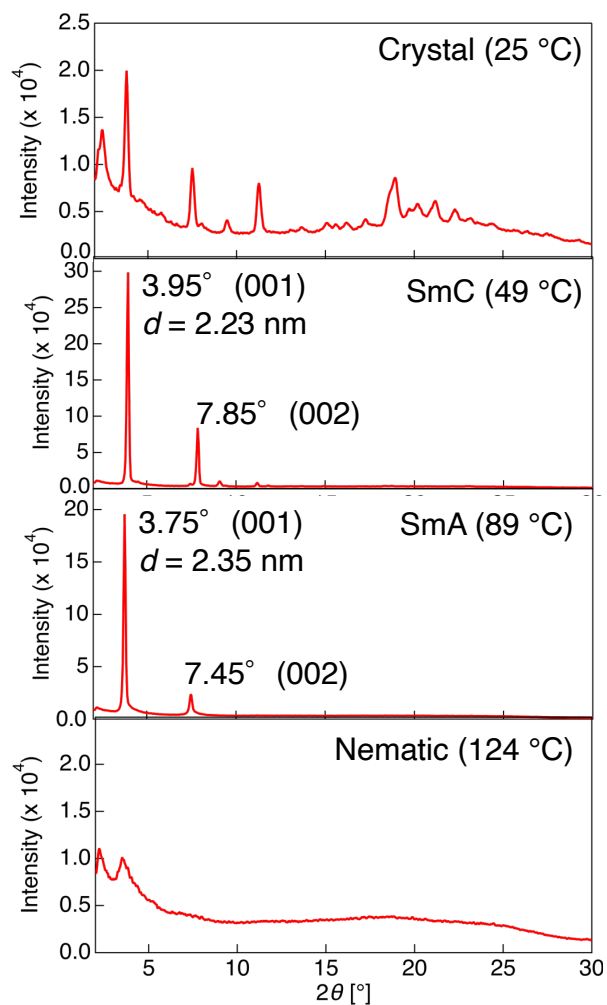

**Figure S57.** (a) Diffraction patterns of **2a** measured in crystalline and N phases. (b) Diffraction patterns of **2d** measured in crystalline, SmC, SmA, and N phases.
